# Supplementary material for: Prolyl 4‐hydroxylase subunit alpha 1 (P4HA1) is a biomarker of poor prognosis in primary melanomas, and its depletion inhibits melanoma cell invasion and disrupts tumor blood vessel walls
Source: PubMed Central journal article supplement (PMC7138405; doi:10.1002/1878-0261.12649), 2020-02-28
Supplement: MOL2-14-742-s001.pdf [file MOL2-14-742-s001.pdf]

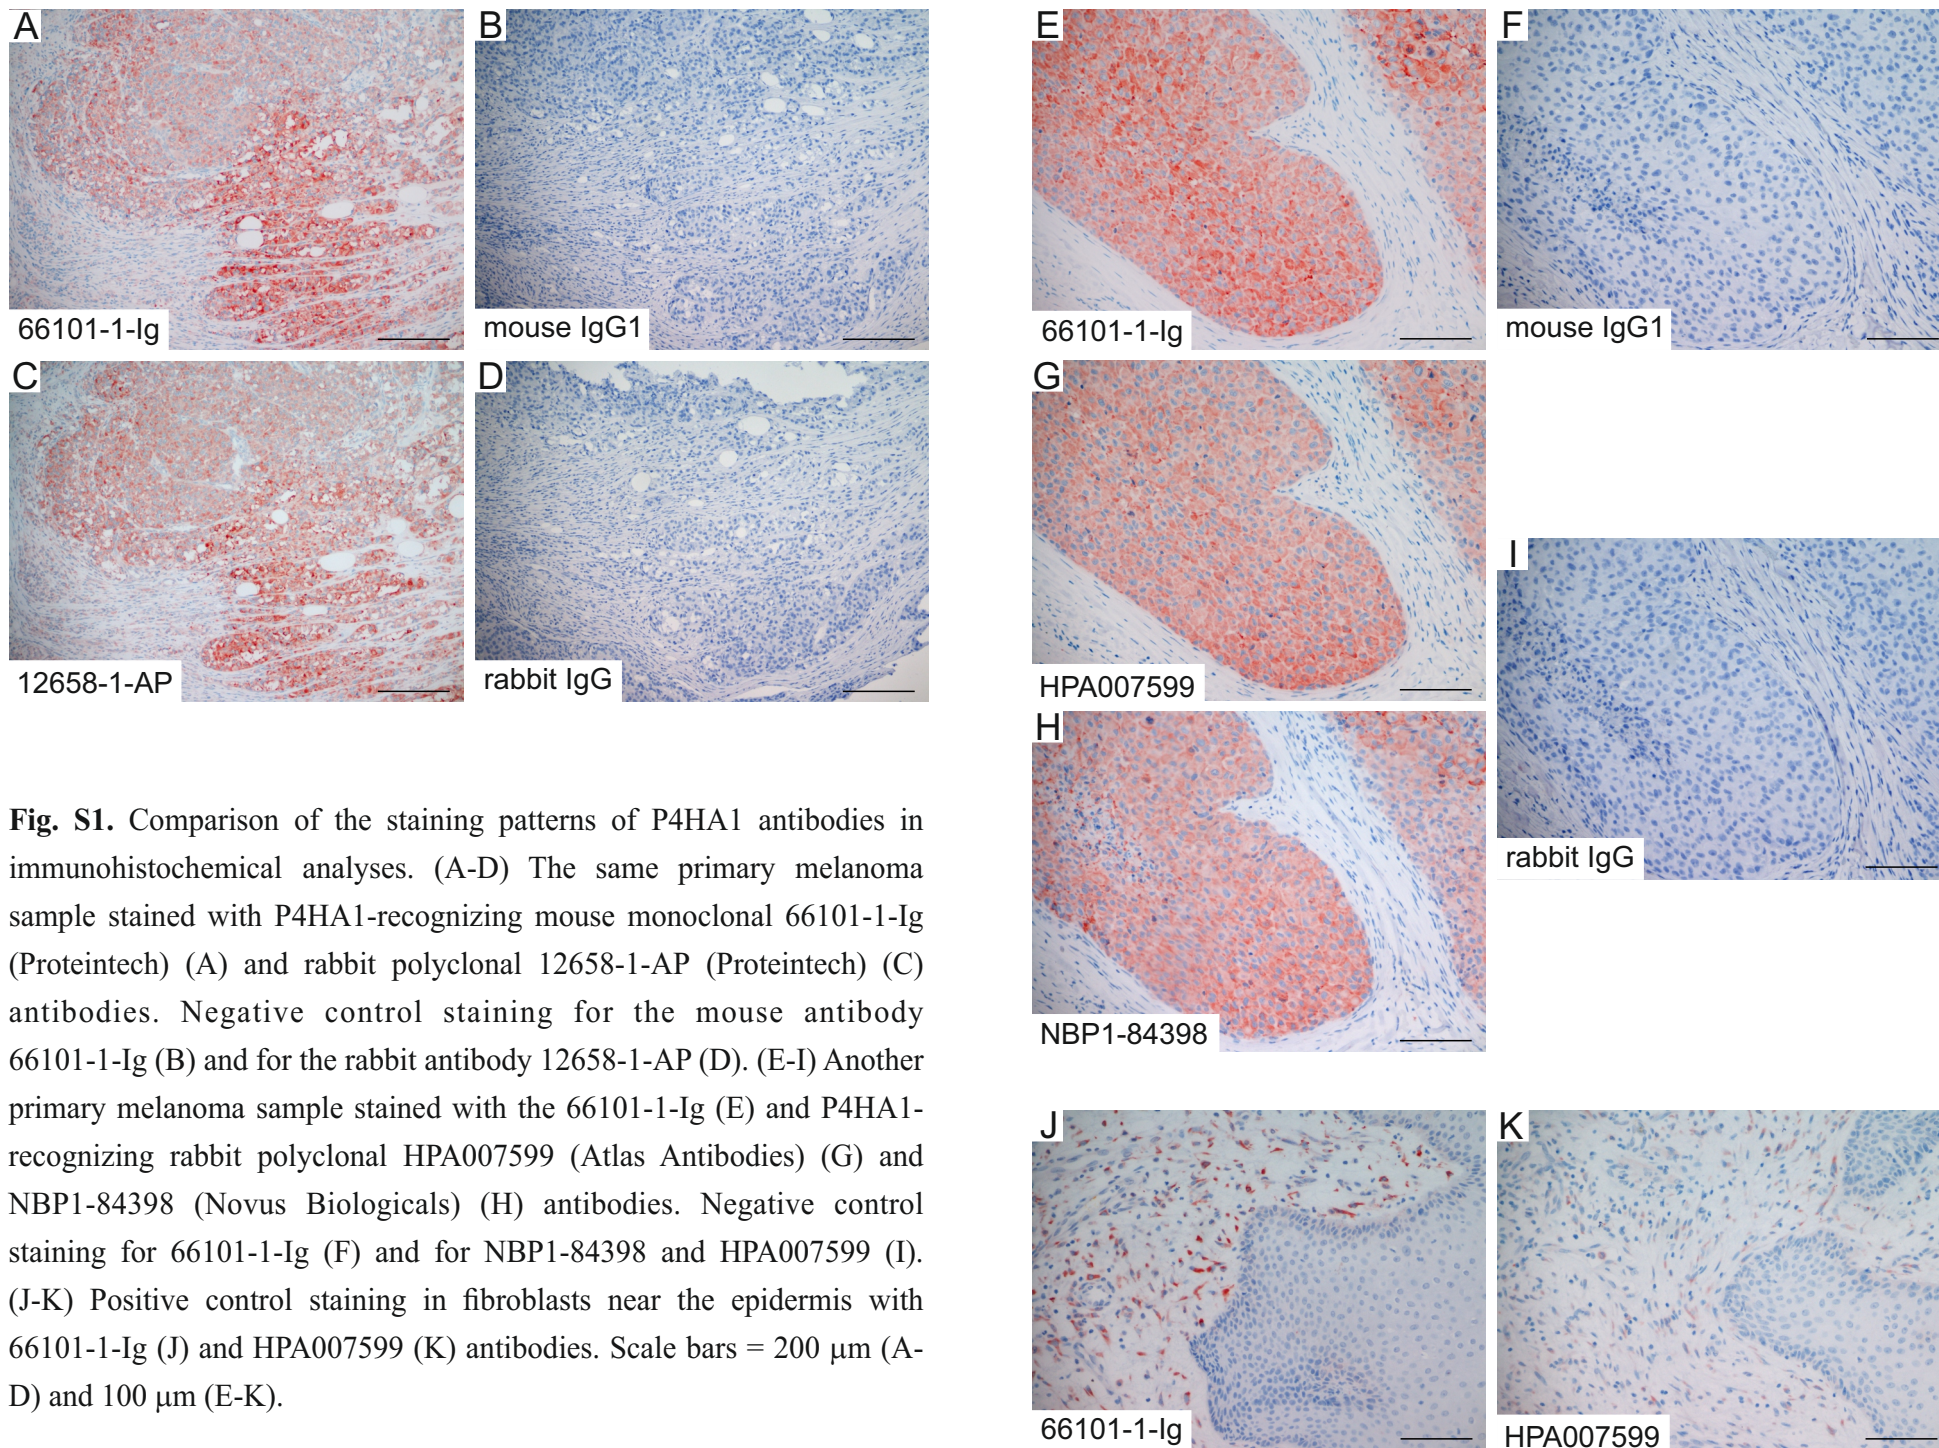

**Fig. S1.** Comparison of the staining patterns of P4HA1 antibodies in immunohistochemical analyses. (A-D) The same primary melanoma sample stained with P4HA1-recognizing mouse monoclonal 66101-1-Ig (Proteintech) (A) and rabbit polyclonal 12658-1-AP (Proteintech) (C) antibodies. Negative control staining for the mouse antibody 66101-1-Ig (B) and for the rabbit antibody 12658-1-AP (D). (E-I) Another primary melanoma sample stained with the 66101-1-Ig (E) and P4HA1-recognizing rabbit polyclonal HPA007599 (Atlas Antibodies) (G) and NBP1-84398 (Novus Biologicals) (H) antibodies. Negative control staining for 66101-1-Ig (F) and for NBP1-84398 and HPA007599 (I). (J-K) Positive control staining in fibroblasts near the epidermis with 66101-1-Ig (J) and HPA007599 (K) antibodies. Scale bars = 200  $\mu$ m (A-D) and 100  $\mu$ m (E-K).
