# Supplementary material for: Prolyl 4‐hydroxylase subunit alpha 1 (P4HA1) is a biomarker of poor prognosis in primary melanomas, and its depletion inhibits melanoma cell invasion and disrupts tumor blood vessel walls
Source: PubMed Central journal article supplement (PMC7138405; doi:10.1002/1878-0261.12649), 2020-02-28
Supplement: MOL2-14-742-s003.pdf [file MOL2-14-742-s003.pdf]

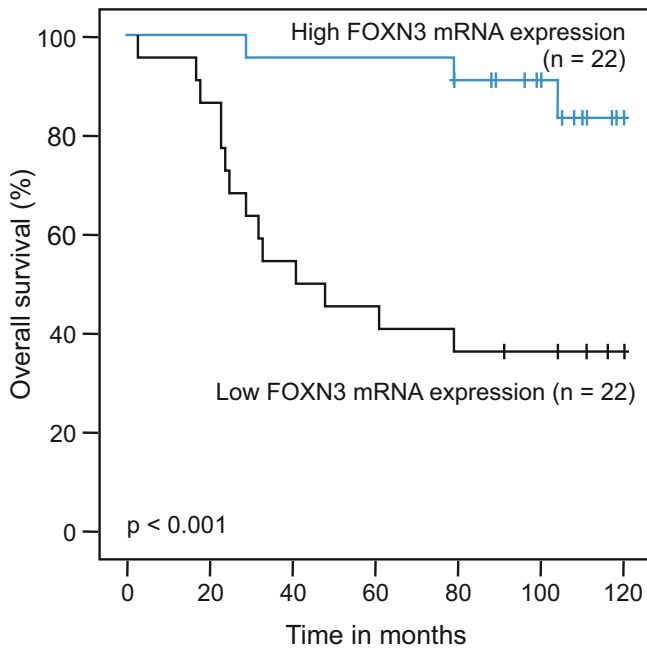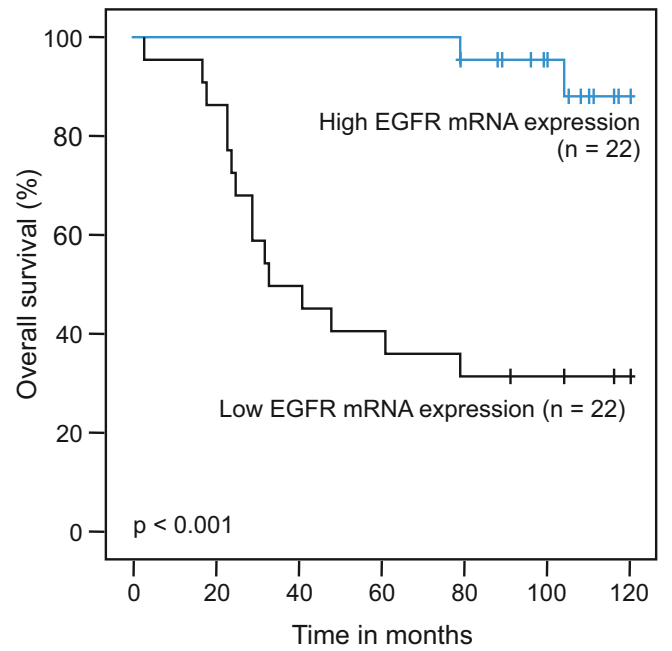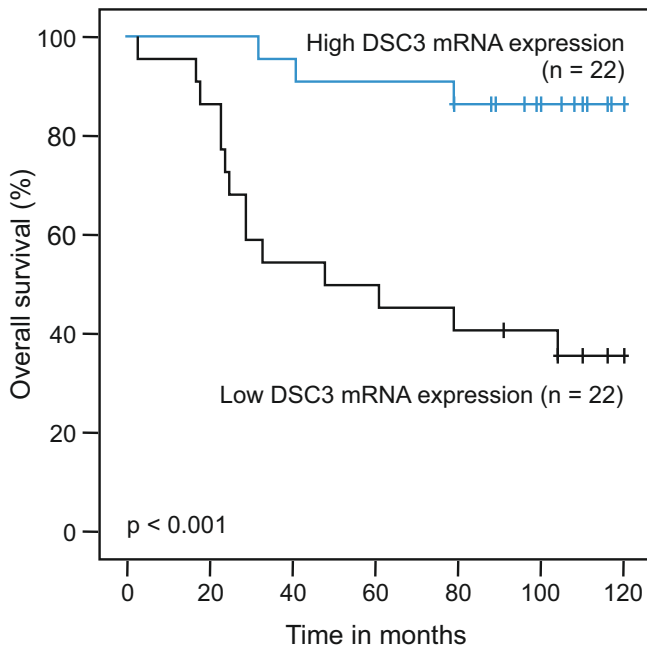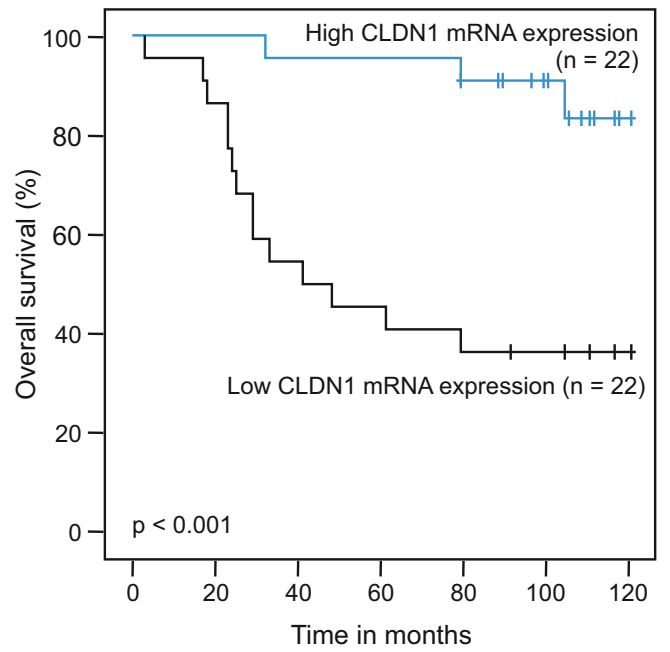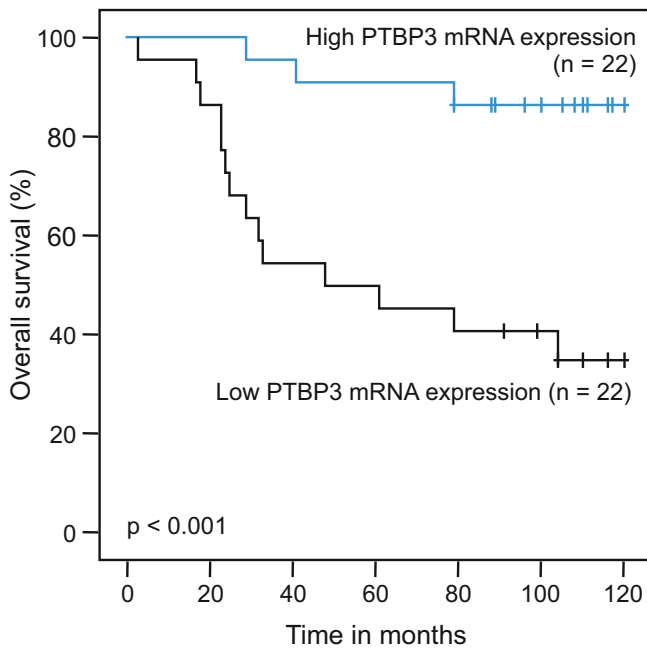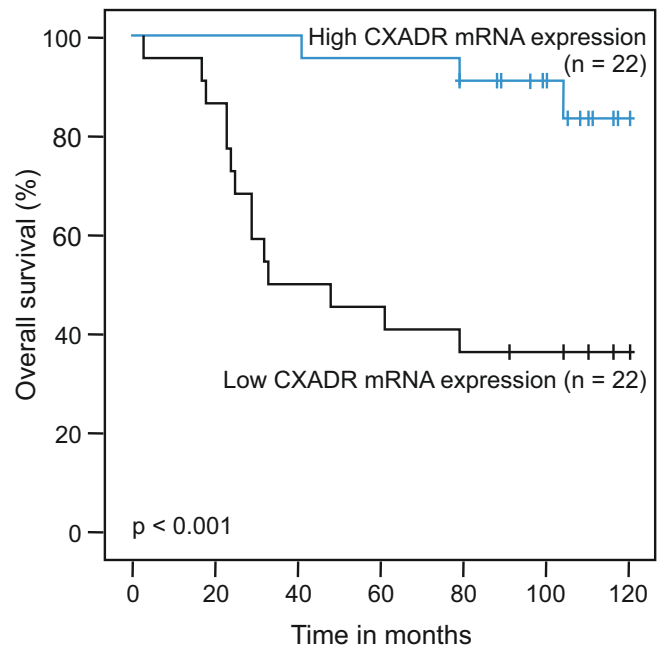

**Fig. S3.** Prognostic value of selected potential marker genes of long survival in primary melanomas. Kaplan-Meier survival curves for patients with primary melanomas that show low and high mRNA expression of selected genes in an independent RNA sequencing data set (GSE98394).
