# Supplementary material for: Prolyl 4‐hydroxylase subunit alpha 1 (P4HA1) is a biomarker of poor prognosis in primary melanomas, and its depletion inhibits melanoma cell invasion and disrupts tumor blood vessel walls
Source: PubMed Central journal article supplement (PMC7138405; doi:10.1002/1878-0261.12649), 2020-02-28
Supplement: MOL2-14-742-s004.pdf [file MOL2-14-742-s004.pdf]

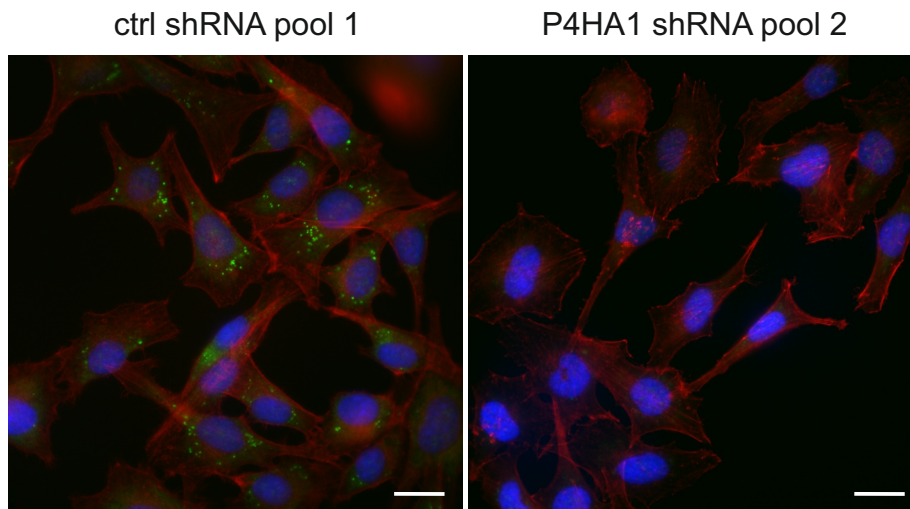

**Fig. S4.** Knockdown of P4HA1 protein in WM239 cells. Immunofluorescence image shows P4HA1 expression in WM239 control (ctrl shRNA) and P4HA1-KD (P4HA1 shRNA) cells. P4HA1 is seen in green, F-actin in red, and nuclei (DAPI) in blue. Scale bars = 25  $\mu$ m.
