# Supplementary material for: Prolyl 4‐hydroxylase subunit alpha 1 (P4HA1) is a biomarker of poor prognosis in primary melanomas, and its depletion inhibits melanoma cell invasion and disrupts tumor blood vessel walls
Source: PubMed Central journal article supplement (PMC7138405; doi:10.1002/1878-0261.12649), 2020-02-28
Supplement: MOL2-14-742-s008.pdf [file MOL2-14-742-s008.pdf]

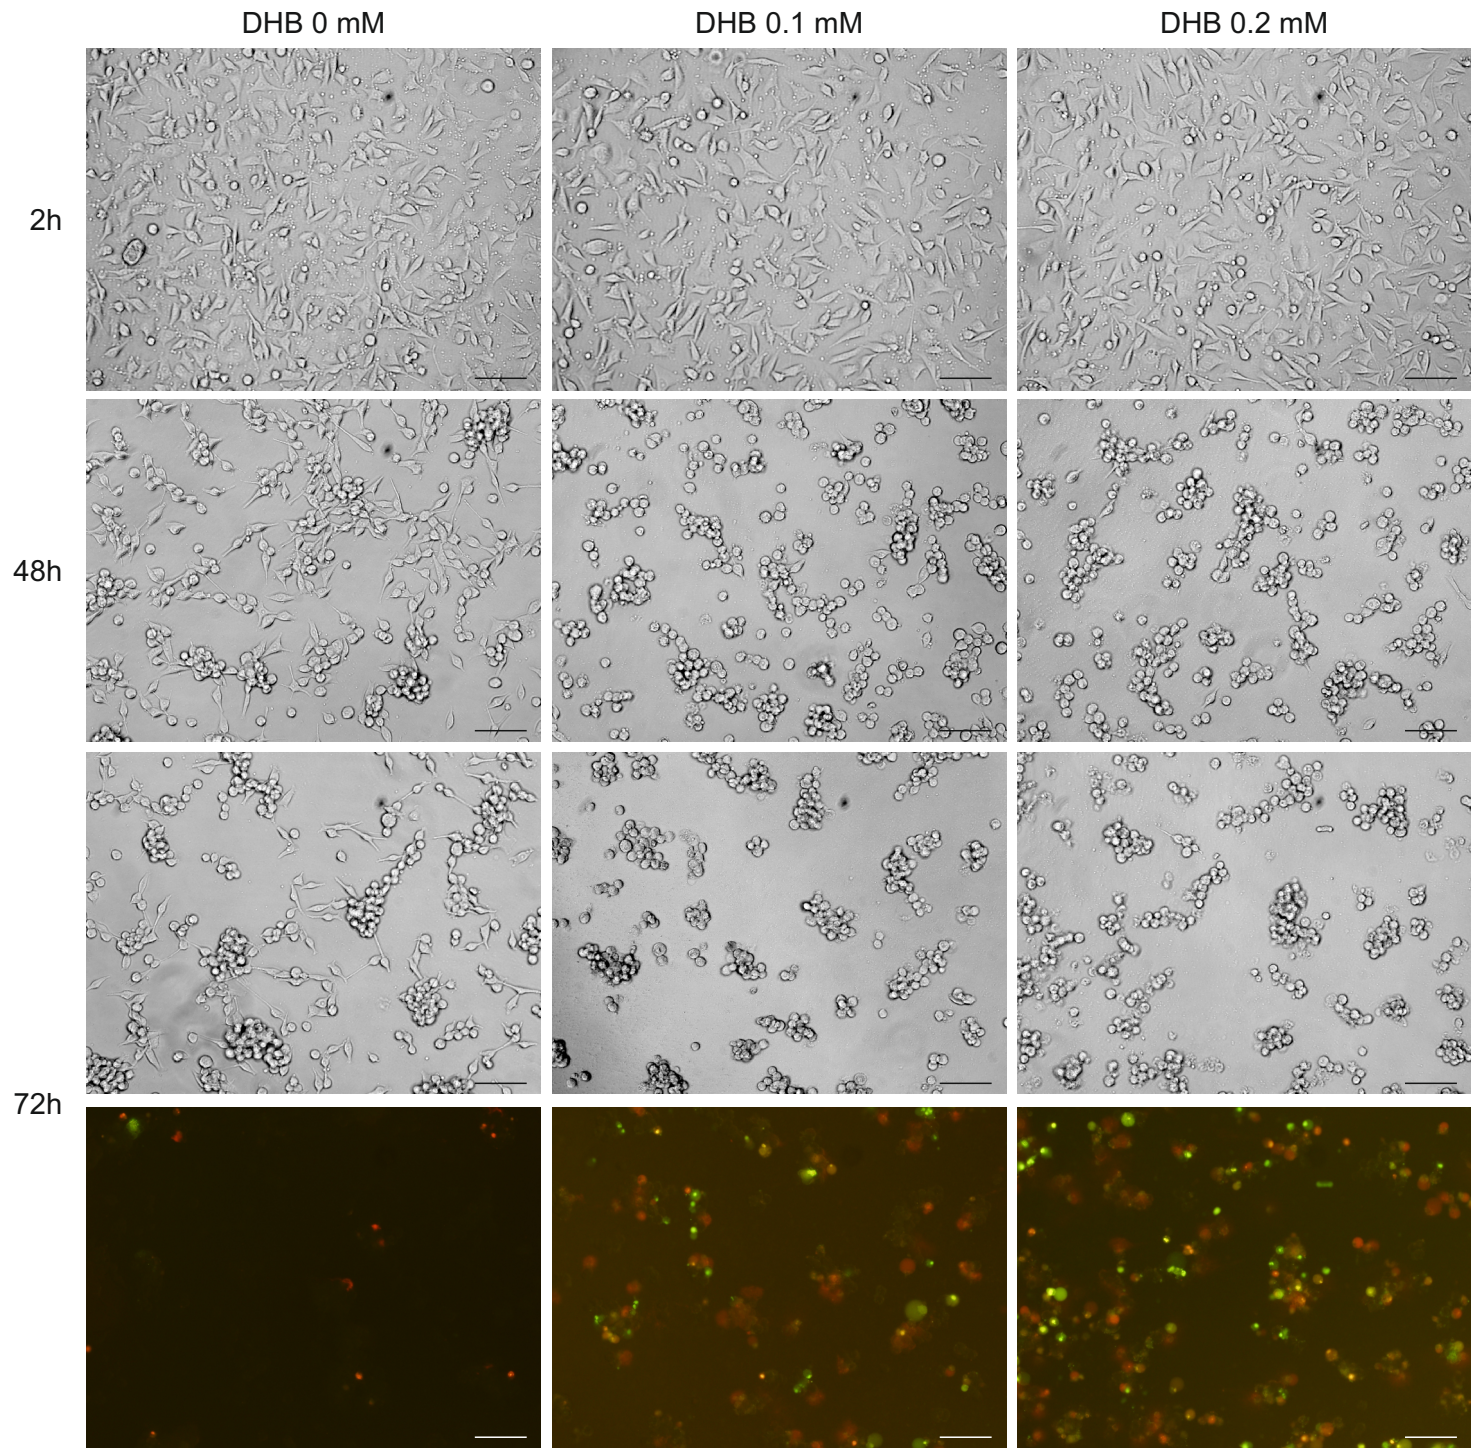

**Fig. S8.** Effect of prolyl 4-hydroxylase inhibition on cell adhesion and apoptosis/viability of SKMEL-28 cells plated on fibronectin-coated surfaces. SKMEL-28 cells were plated in serum-free media without or with a prolyl 4-hydroxylase inhibitor 3,4-dihydroxybenzoic acid (DHB) and photographed after 2h, 48h, and 72h incubation. Both phase-contrast and fluorescence images are shown after 72h incubation. Apoptotic cells (with activated caspase-3/7) are seen in green and dead cells (stained with propidium iodide) in red. Apoptotic, dead cells are seen in yellow. Scale bars = 100  $\mu$ m.
