# Supplementary material for: Prolyl 4‐hydroxylase subunit alpha 1 (P4HA1) is a biomarker of poor prognosis in primary melanomas, and its depletion inhibits melanoma cell invasion and disrupts tumor blood vessel walls
Source: PubMed Central journal article supplement (PMC7138405; doi:10.1002/1878-0261.12649), 2020-02-28
Supplement: MOL2-14-742-s012.pdf [file MOL2-14-742-s012.pdf]

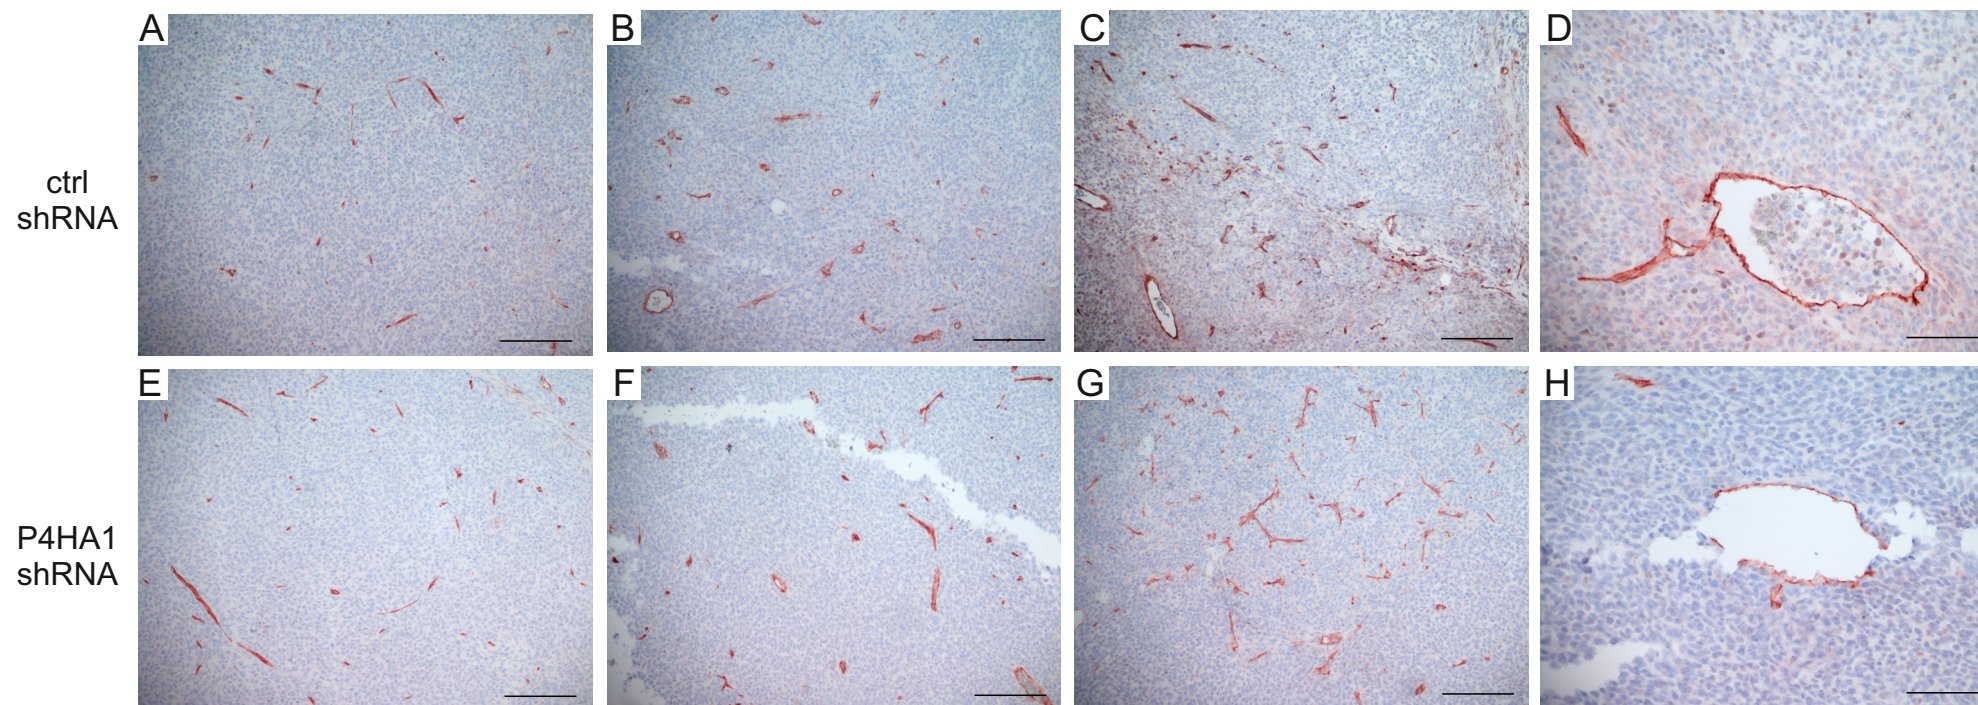

**Fig. S12.** Immunohistochemical staining of the endothelial cell marker CD31 in xenograft tumors derived from WM239 control and P4HA1-knockdown cells. Representative images of the CD31 staining in control (ctrl shRNA) (A-D) and P4HA1-KD (P4HA1 shRNA) (E-H) tumors. Positive immunostaining is seen in red. Note that the vessel in (D) contains tumor cells. Scale bars = 200  $\mu$ m (A-C,E-G), 100  $\mu$ m (D,H).
