# Supplementary material for: Prolyl 4‐hydroxylase subunit alpha 1 (P4HA1) is a biomarker of poor prognosis in primary melanomas, and its depletion inhibits melanoma cell invasion and disrupts tumor blood vessel walls
Source: PubMed Central journal article supplement (PMC7138405; doi:10.1002/1878-0261.12649), 2020-02-28
Supplement: MOL2-14-742-s015.pdf [file MOL2-14-742-s015.pdf]

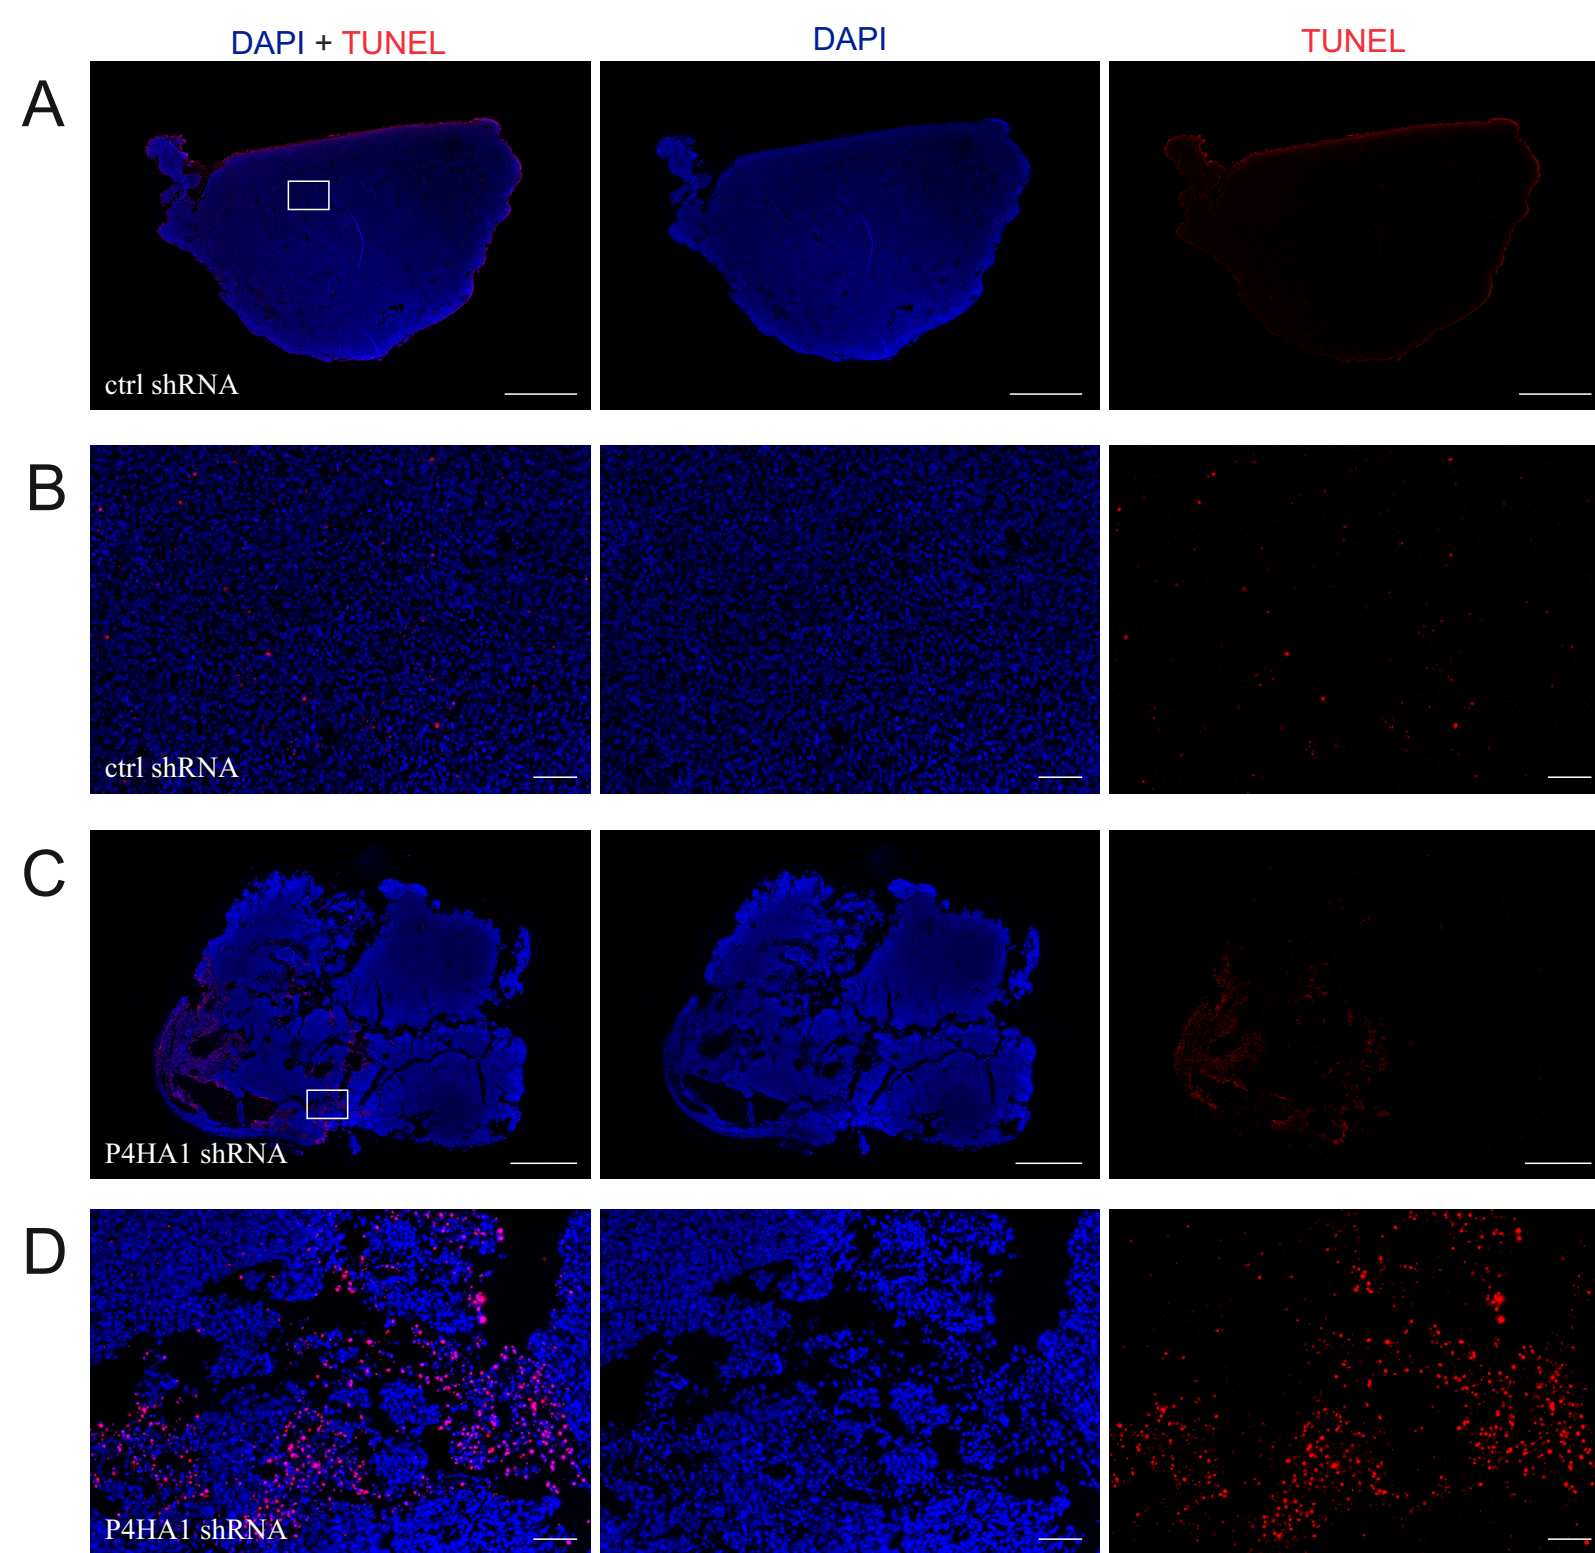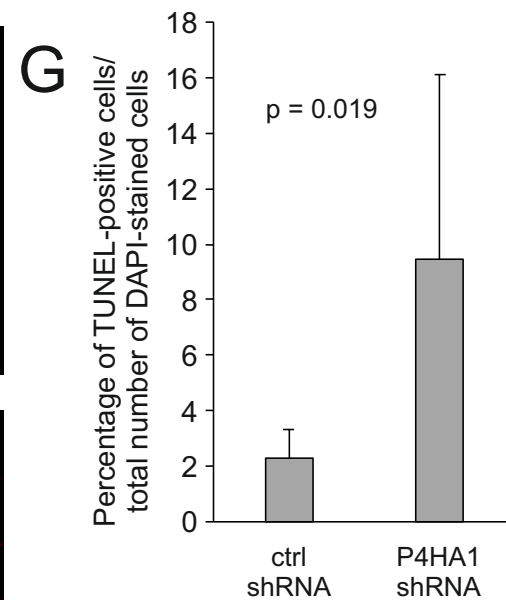

**Fig. S15.** Analysis of apoptosis (and necrosis) by TUNEL staining in tumors derived from WM239 control and P4HA1-knockdown cells in nude mice. (A-D). Representative images of TUNEL staining in control (ctrl shRNA) (A and B) and P4HA1-KD (P4HA1 shRNA) (C and D) tumors. (B) and (D) are higher magnifications of the boxed area in (A) and (C). Positive TUNEL staining is seen in red and nuclei in blue (DAPI). Scale bars = 2000  $\mu\text{m}$  (A,C), 100  $\mu\text{m}$  (B,D). (E) The percentage of TUNEL-positive cells of the total number of cells (nuclei stained by DAPI) per tumor section in all control and P4HA1-KD tumors. Data are expressed as means  $\pm$  SD. The non-specific staining at the border of the tumor sections (example seen in (A)) was masked before quantification.
