# Supplementary material for: Prolyl 4‐hydroxylase subunit alpha 1 (P4HA1) is a biomarker of poor prognosis in primary melanomas, and its depletion inhibits melanoma cell invasion and disrupts tumor blood vessel walls
Source: PubMed Central journal article supplement (PMC7138405; doi:10.1002/1878-0261.12649), 2020-02-28
Supplement: MOL2-14-742-s016.pdf [file MOL2-14-742-s016.pdf]

**Table S1.** PCR variables.

| Gene          | 1)               | Sequence 5' to 3'         | 2) | 3)                          | Source                       |
|---------------|------------------|---------------------------|----|-----------------------------|------------------------------|
| <i>ACTB</i>   | F                | GCTCGTCGTCGACAACGGCTC     | 55 | 20                          | Invitrogen/Life Technologies |
|               | R                | CAAACATGATCTGGGTCATCTTCTC |    |                             |                              |
| <i>CTHRC1</i> | F                | AGCGCCTCTGAGATCCCCAA      | 59 | 22                          | Park <i>et al.</i> , 2013    |
|               | R                | TGAACAAGTGCCAACCCAGA      |    |                             |                              |
| <i>P4HA1</i>  | all variants     | F                         | 56 | 22-26                       | PrimerQuest                  |
|               |                  | R                         |    |                             |                              |
|               | variant 1        | F                         | 56 | 25                          | PrimerQuest                  |
|               |                  | R                         |    |                             |                              |
|               | variants 2 and 3 | F                         | 56 | 25                          | PrimerQuest                  |
|               |                  | R                         |    |                             |                              |
|               | variant 4        | F                         | 56 | 34                          | PrimerQuest                  |
|               |                  | R                         |    |                             |                              |
| <i>P4HA2</i>  | F                | 56                        | 24 | Gilkes <i>et al.</i> , 2013 |                              |
|               | R                |                           |    |                             | TGTGCCTGGGTCCAGCCTGT         |

1) Primer orientation, F=forward, R=reverse; 2) Annealing temperature (°C); 3) Number of PCR cycles

Gilkes, DM, Chaturvedi, P, Bajpai, S, Wong, CC, Wei, H, Pitcairn, S, Hubbi, ME, Wirtz, D and Semenza, GL (2013) Collagen prolyl hydroxylases are essential for breast cancer metastasis. *Cancer Res* **73**, 3285-3296.

Park, EH, Kim, S, Jo, JY, Kim, SJ, Hwang, Y, Kim, JM, Song, SY, Lee, DK and Koh, SS (2013) Collagen triple helix repeat containing-1 promotes pancreatic cancer progression by regulating migration and adhesion of tumor cells. *Carcinogenesis* **34**, 694-702.
