# Supplementary material for: Prolyl 4‐hydroxylase subunit alpha 1 (P4HA1) is a biomarker of poor prognosis in primary melanomas, and its depletion inhibits melanoma cell invasion and disrupts tumor blood vessel walls
Source: PubMed Central journal article supplement (PMC7138405; doi:10.1002/1878-0261.12649), 2020-02-28
Supplement: MOL2-14-742-s017.pdf [file MOL2-14-742-s017.pdf]

Table S2. Significance Analysis of Microarrays (SAM) results of mRNA expression levels in primary melanomas associated most significantly with patient survival (higher expression in cases with short survival).

| Gene            | Gene description                                                    | Gene ID     | SAM score | False discovery rate q-value | Mean expression |       | Fold Dead vs alive | Fold Primary melanomas vs benign nevi | Fold Melanoma cells vs melanocytes |
|-----------------|---------------------------------------------------------------------|-------------|-----------|------------------------------|-----------------|-------|--------------------|---------------------------------------|------------------------------------|
|                 |                                                                     |             |           |                              | Alive           | Dead  |                    |                                       |                                    |
| <i>CNP</i>      | 2',3'-cyclic nucleotide 3' phosphodiesterase                        | 208912_s_at | 4.205     | 0.001                        | 832             | 1546  | 1.9                | 1.0                                   | -1.3                               |
| <i>P4HA1</i>    | prolyl 4-hydroxylase subunit alpha 1                                | 207543_s_at | 4.147     | 0.001                        | 425             | 1021  | 2.4                | 1.4                                   | 4.3                                |
| <i>RHOC</i>     | ras homolog family member C                                         | 200885_at   | 4.040     | 0.001                        | 1115            | 2080  | 1.9                | 1.2                                   | 2.4                                |
| <i>SERPINA3</i> | serpin family A member 3                                            | 202376_at   | 3.946     | 0.001                        | 396             | 1908  | 4.8                | 3.9                                   | 38.0                               |
| <i>SLC27A3</i>  | solute carrier family 27 member 3                                   | 222217_s_at | 3.888     | 0.001                        | 333             | 1138  | 3.4                | 1.7                                   | -6.1                               |
| <i>SORT1</i>    | sortilin 1                                                          | 212807_s_at | 3.715     | 0.001                        | 426             | 1064  | 2.5                | 1.8                                   | -6.9                               |
| <i>ATP1A1</i>   | ATPase Na <sup>+</sup> /K <sup>+</sup> transporting subunit alpha 1 | 220948_s_at | 3.675     | 0.001                        | 2130            | 4235  | 2.0                | 1.1                                   | -1.2                               |
| <i>CD63</i>     | CD63 molecule                                                       | 200663_at   | 3.665     | 0.001                        | 6668            | 10900 | 1.6                | 1.1                                   | -1.5                               |
| <i>S100B</i>    | S100 calcium binding protein B                                      | 209686_at   | 3.635     | 0.001                        | 940             | 3243  | 3.4                | 1.0                                   | 5.0                                |
| <i>PLA1A</i>    | phospholipase A1 member A                                           | 219584_at   | 3.629     | 0.001                        | 147             | 1276  | 8.7                | 1.5                                   | -9.9                               |
| <i>USP54</i>    | ubiquitin specific peptidase 54                                     | 227334_at   | 3.543     | 0.001                        | 358             | 736   | 2.1                | 1.1                                   | -3.0                               |
| <i>ELOVL2</i>   | ELOVL fatty acid elongase 2                                         | 213712_at   | 3.539     | 0.001                        | 132             | 609   | 4.6                | 1.7                                   | 1.5                                |
| <i>CDK2AP1</i>  | cyclin dependent kinase 2 associated protein 1                      | 201938_at   | 3.502     | 0.001                        | 2961            | 4978  | 1.7                | 1.4                                   | 1.3                                |
| <i>BIRC7</i>    | baculoviral IAP repeat containing 7                                 | 220451_s_at | 3.471     | 0.001                        | 196             | 680   | 3.5                | 1.2                                   | -1.5                               |
| <i>PACSIN2</i>  | protein kinase C and casein kinase substrate in neurons 2           | 201651_s_at | 3.468     | 0.001                        | 1564            | 2386  | 1.5                | -1.1                                  | 1.2                                |
| <i>MELTF</i>    | melanotransferrin                                                   | 235911_at   | 3.417     | 0.001                        | 402             | 1127  | 2.8                | 1.1                                   | -1.6                               |
| <i>BIN3</i>     | bridging integrator 3                                               | 222199_s_at | 3.384     | 0.001                        | 295             | 661   | 2.2                | 1.7                                   | 2.2                                |
| <i>ARHGEF40</i> | Rho guanine nucleotide exchange factor 40                           | 220326_s_at | 3.358     | 0.001                        | 314             | 740   | 2.4                | -1.1                                  | -1.1                               |
| <i>SHC1</i>     | SHC adaptor protein 1                                               | 214853_s_at | 3.343     | 0.001                        | 1906            | 3723  | 2.0                | 1.7                                   | 2.2                                |
| <i>FN1</i>      | fibronectin 1                                                       | 216442_x_at | 3.278     | 0.001                        | 3351            | 9698  | 2.9                | 2.5                                   | 3.5                                |
| <i>HHATL</i>    | hedgehog acyltransferase like                                       | 223572_at   | 3.261     | 0.001                        | 55              | 359   | 6.6                | -12.7                                 | 1.1                                |

|                 |                                                   |             |       |       |      |      |     |      |       |
|-----------------|---------------------------------------------------|-------------|-------|-------|------|------|-----|------|-------|
| <i>TLNRD1</i>   | talin rod domain containing 1                     | 223264_at   | 3.250 | 0.001 | 623  | 1626 | 2.6 | 1.2  | -1.5  |
| <i>ARPC1B</i>   | actin related protein 2/3 complex subunit 1B      | 201954_at   | 3.229 | 0.001 | 1886 | 4217 | 2.2 | 2.3  | 1.6   |
| <i>PSMB4</i>    | proteasome subunit beta 4                         | 202243_s_at | 3.197 | 0.001 | 1759 | 2830 | 1.6 | 1.0  | 1.0   |
| <i>FKBP11</i>   | FKBP prolyl isomerase 11                          | 219117_s_at | 3.181 | 0.001 | 638  | 1557 | 2.4 | 3.4  | -2.0  |
| <i>COL9A3</i>   | collagen type IX alpha 3 chain                    | 204724_s_at | 3.181 | 0.001 | 177  | 814  | 4.6 | 2.4  | 9.8   |
| <i>GNG5</i>     | G protein subunit gamma 5                         | 207157_s_at | 3.132 | 0.001 | 2374 | 3804 | 1.6 | 1.3  | -1.2  |
| <i>SDC3</i>     | syndecan 3                                        | 202898_at   | 3.108 | 0.001 | 405  | 1175 | 2.9 | -1.4 | 4.5   |
| <i>ETV5</i>     | ETS variant 5                                     | 230102_at   | 3.094 | 0.001 | 256  | 622  | 2.4 | -2.0 | 1.4   |
| <i>TYR</i>      | tyrosinase                                        | 206630_at   | 3.084 | 0.001 | 3303 | 6694 | 2.0 | -1.3 | -62.1 |
| <i>HYOU1</i>    | hypoxia up-regulated 1                            | 200825_s_at | 3.079 | 0.001 | 920  | 1516 | 1.6 | 1.6  | 3.4   |
| <i>SOX10</i>    | SRY-box 10                                        | 209842_at   | 3.047 | 0.001 | 798  | 1717 | 2.2 | -1.7 | -1.4  |
| <i>TAF6</i>     | TATA-box binding protein associated factor 6      | 203572_s_at | 3.038 | 0.001 | 377  | 668  | 1.8 | 1.1  | 1.3   |
| <i>PSRC1</i>    | proline and serine rich coiled-coil 1             | 201896_s_at | 3.035 | 0.001 | 123  | 486  | 3.9 | 1.4  | 2.2   |
| <i>DUSP4</i>    | dual specificity phosphatase 4                    | 204015_s_at | 3.027 | 0.001 | 301  | 695  | 2.3 | 1.3  | 1.3   |
| <i>BACE2</i>    | beta-secretase 2                                  | 217867_x_at | 3.013 | 0.001 | 714  | 1538 | 2.2 | -1.1 | -1.7  |
| <i>TBX2</i>     | T-box 2                                           | 40560_at    | 3.005 | 0.001 | 244  | 599  | 2.5 | 1.0  | 1.2   |
| <i>POPDC3</i>   | popeye domain containing 3                        | 219926_at   | 2.980 | 0.001 | 98   | 339  | 3.5 | 2.2  | -2.5  |
| <i>PLOD3</i>    | procollagen-lysine,2-oxoglutarate 5-dioxygenase 3 | 202185_at   | 2.979 | 0.001 | 1450 | 2767 | 1.9 | 1.8  | 1.8   |
| <i>MCAM</i>     | melanoma cell adhesion molecule                   | 210869_s_at | 2.971 | 0.001 | 426  | 1024 | 2.4 | 2.4  | 13.2  |
| <i>SRGAP1</i>   | SLIT-ROBO Rho GTPase activating protein 1         | 227484_at   | 2.954 | 0.001 | 268  | 452  | 1.7 | -1.1 | 1.0   |
| <i>CALR</i>     | calreticulin                                      | 212953_x_at | 2.942 | 0.001 | 1048 | 1574 | 1.5 | -1.1 | 1.8   |
| <i>APOD</i>     | apolipoprotein D                                  | 201525_at   | 2.924 | 0.001 | 4028 | 8354 | 2.1 | 1.0  | -14.9 |
| <i>ACSL3</i>    | acyl-CoA synthetase long chain family member 3    | 201662_s_at | 2.922 | 0.001 | 659  | 1149 | 1.7 | 2.4  | 4.0   |
| <i>GLMP</i>     | glycosylated lysosomal membrane protein           | 225401_at   | 2.916 | 0.001 | 847  | 1932 | 2.3 | 1.2  | -4.3  |
| <i>PLAT</i>     | plasminogen activator, tissue type                | 201860_s_at | 2.909 | 0.001 | 418  | 929  | 2.2 | 2.1  | 11.8  |
| <i>CNDP1</i>    | carnosine dipeptidase 1                           | 223699_at   | 2.891 | 0.001 | 71   | 254  | 3.6 | 1.9  | 1.3   |
| <i>LGALS3BP</i> | galectin 3 binding protein                        | 200923_at   | 2.890 | 0.001 | 1356 | 2181 | 1.6 | 1.4  | -2.1  |
| <i>MYH10</i>    | myosin heavy chain 10                             | 212372_at   | 2.885 | 0.001 | 971  | 1836 | 1.9 | 1.2  | 1.9   |

|                |                                                             |              |       |       |      |      |     |      |      |
|----------------|-------------------------------------------------------------|--------------|-------|-------|------|------|-----|------|------|
| <i>GJB1</i>    | gap junction protein beta 1                                 | 204973_at    | 2.880 | 0.001 | 319  | 651  | 2.0 | -1.1 | -1.2 |
| <i>HSP90B1</i> | heat shock protein 90 beta family member 1                  | 200598_s_at  | 2.880 | 0.001 | 799  | 1523 | 1.9 | 1.7  | 2.9  |
| <i>NES</i>     | nestin                                                      | 218678_at    | 2.863 | 0.001 | 688  | 1363 | 2.0 | 1.5  | 5.6  |
| <i>UPP1</i>    | uridine phosphorylase 1                                     | 203234_at    | 2.861 | 0.001 | 265  | 618  | 2.3 | 4.0  | 1.4  |
| <i>IGFBP2</i>  | insulin like growth factor binding protein 2                | 202718_at    | 2.856 | 0.001 | 354  | 857  | 2.4 | 3.1  | 17.0 |
| <i>ODC1</i>    | ornithine decarboxylase 1                                   | 200790_at    | 2.848 | 0.001 | 677  | 1167 | 1.7 | 1.8  | 6.1  |
| <i>CHST11</i>  | carbohydrate sulfotransferase 11                            | 226372_at    | 2.842 | 0.001 | 341  | 820  | 2.4 | 1.3  | 2.6  |
| <i>PYGL</i>    | glycogen phosphorylase L                                    | 202990_at    | 2.831 | 0.001 | 397  | 678  | 1.7 | -3.4 | 2.3  |
| <i>BUD23</i>   | BUD23 rRNA methyltransferase and ribosome maturation factor | 207628_s_at  | 2.830 | 0.001 | 670  | 1085 | 1.6 | 1.2  | 2.3  |
| <i>SHISA2</i>  | shisa family member 2                                       | 230493_at    | 2.824 | 0.001 | 156  | 490  | 3.2 | 1.0  | 2.7  |
| <i>ECM1</i>    | extracellular matrix protein 1                              | 209365_s_at  | 2.823 | 0.001 | 880  | 1762 | 2.0 | 1.7  | -1.9 |
| <i>TMEM8A</i>  | transmembrane protein 8A                                    | 221882_s_at  | 2.818 | 0.001 | 325  | 706  | 2.2 | 2.0  | -1.9 |
| <i>PKM</i>     | pyruvate kinase M1/2                                        | 201251_at    | 2.781 | 0.001 | 1983 | 3556 | 1.8 | 1.3  | 4.2  |
| <i>MIA</i>     | MIA SH3 domain containing                                   | 206560_s_at  | 2.758 | 0.001 | 706  | 1912 | 2.7 | 1.5  | 9.2  |
| <i>ITGA10</i>  | integrin subunit alpha 10                                   | 206766_at    | 2.752 | 0.001 | 176  | 663  | 3.8 | 2.3  | 1.0  |
| <i>MAP3K11</i> | mitogen-activated protein kinase kinase kinase 11           | 203652_at    | 2.750 | 0.001 | 389  | 714  | 1.8 | 1.0  | -2.6 |
| <i>CFL2</i>    | cofilin 2                                                   | 224663_s_at  | 2.750 | 0.001 | 270  | 516  | 1.9 | 1.2  | 1.2  |
| <i>ENO2</i>    | enolase 2                                                   | 201313_at    | 2.749 | 0.001 | 182  | 572  | 3.1 | 2.2  | -1.6 |
| <i>NID1</i>    | nidogen 1                                                   | 202007_at    | 2.746 | 0.001 | 474  | 897  | 1.9 | 1.8  | 3.1  |
| <i>PARVB</i>   | parvin beta                                                 | 204629_at    | 2.744 | 0.001 | 242  | 513  | 2.1 | 1.3  | 1.3  |
| <i>FAM167B</i> | family with sequence similarity 167 member B                | 223657_at    | 2.740 | 0.001 | 97   | 234  | 2.4 | 1.2  | -1.8 |
| <i>ETV4</i>    | ETS variant 4                                               | 1554576_a_at | 2.737 | 0.001 | 189  | 360  | 1.9 | 1.3  | ND   |
| <i>SH2B3</i>   | SH2B adaptor protein 3                                      | 203320_at    | 2.735 | 0.001 | 361  | 819  | 2.3 | 2.6  | 8.5  |
| <i>TSPAN3</i>  | tetraspanin 3                                               | 200972_at    | 2.734 | 0.001 | 1454 | 2322 | 1.6 | 1.0  | -1.8 |
| <i>SCCPDH</i>  | saccharopine dehydrogenase (putative)                       | 201825_s_at  | 2.701 | 0.001 | 290  | 585  | 2.0 | 1.3  | 1.5  |
| <i>LEF1</i>    | lymphoid enhancer binding factor 1                          | 221558_s_at  | 2.701 | 0.001 | 770  | 1597 | 2.1 | 1.5  | 2.0  |
| <i>CSPG4</i>   | chondroitin sulfate proteoglycan 4                          | 214297_at    | 2.701 | 0.001 | 131  | 705  | 5.4 | -1.2 | 5.8  |
| <i>LMF2</i>    | lipase maturation factor 2                                  | 31837_at     | 2.698 | 0.001 | 674  | 1091 | 1.6 | 1.2  | -1.1 |

|                 |                                                             |              |       |       |      |      |      |      |      |
|-----------------|-------------------------------------------------------------|--------------|-------|-------|------|------|------|------|------|
| <i>IGSF8</i>    | immunoglobulin superfamily member 8                         | 225025_at    | 2.694 | 0.001 | 271  | 526  | 1.9  | 1.2  | -2.8 |
| <i>PLEKHB1</i>  | pleckstrin homology domain containing B1                    | 209504_s_at  | 2.693 | 0.001 | 111  | 377  | 3.4  | 1.8  | -1.1 |
| <i>MMP16</i>    | matrix metalloproteinase 16                                 | 223614_at    | 2.687 | 0.001 | 155  | 480  | 3.1  | 1.3  | 13.3 |
| <i>ITGA7</i>    | integrin subunit alpha 7                                    | 216331_at    | 2.685 | 0.001 | 229  | 507  | 2.2  | 2.0  | 1.0  |
| <i>SPON2</i>    | spondin 2                                                   | 218638_s_at  | 2.684 | 0.001 | 434  | 997  | 2.3  | -1.1 | -2.2 |
| <i>PDIA6</i>    | protein disulfide isomerase family A member 6               | 207668_x_at  | 2.675 | 0.001 | 1464 | 2254 | 1.5  | 1.3  | 4.0  |
| <i>TIMP3</i>    | TIMP metalloproteinase inhibitor 3                          | 201147_s_at  | 2.672 | 0.001 | 468  | 972  | 2.1  | -1.4 | 27.7 |
| <i>UBE2C</i>    | ubiquitin conjugating enzyme E2 C                           | 202954_at    | 2.670 | 0.001 | 373  | 718  | 1.9  | 2.4  | 7.0  |
| <i>HOXB7</i>    | homeobox B7                                                 | 204779_s_at  | 2.641 | 0.001 | 342  | 663  | 1.9  | -1.2 | -1.6 |
| <i>TFPI2</i>    | tissue factor pathway inhibitor 2                           | 209278_s_at  | 2.640 | 0.001 | 62   | 1154 | 18.6 | 19.1 | 33.0 |
| <i>S100A1</i>   | S100 calcium binding protein A1                             | 205334_at    | 2.638 | 0.001 | 507  | 1129 | 2.2  | 1.8  | -1.4 |
| <i>CRTAP</i>    | cartilage associated protein                                | 1555889_a_at | 2.623 | 0.001 | 2217 | 3820 | 1.7  | -1.5 | ND   |
| <i>MOK</i>      | MOK protein kinase                                          | 205130_at    | 2.619 | 0.001 | 322  | 540  | 1.7  | -2.2 | 6.3  |
| <i>ANXA5</i>    | annexin A5                                                  | 200782_at    | 2.613 | 0.001 | 2908 | 4610 | 1.6  | 1.0  | -2.5 |
| <i>TYMS</i>     | thymidylate synthetase                                      | 202589_at    | 2.597 | 0.001 | 780  | 1505 | 1.9  | 2.6  | 10.4 |
| <i>SPCS1</i>    | signal peptidase complex subunit 1                          | 217927_at    | 2.593 | 0.001 | 2414 | 3701 | 1.5  | 1.2  | 1.5  |
| <i>INPP5F</i>   | inositol polyphosphate-5-phosphatase F                      | 230363_s_at  | 2.589 | 0.001 | 66   | 200  | 3.0  | 1.4  | 2.0  |
| <i>CNN3</i>     | calponin 3                                                  | 201445_at    | 2.587 | 0.001 | 745  | 1508 | 2.0  | 1.2  | 2.6  |
| <i>GPI</i>      | glucose-6-phosphate isomerase                               | 208308_s_at  | 2.586 | 0.001 | 1439 | 2248 | 1.6  | 1.3  | 1.5  |
| <i>NME4</i>     | NME/NM23 nucleoside diphosphate kinase 4                    | 212739_s_at  | 2.585 | 0.001 | 540  | 977  | 1.8  | 1.2  | -1.2 |
| <i>LAMTOR5</i>  | late endosomal/lysosomal adaptor, MAPK and MTOR activator 5 | 202300_at    | 2.581 | 0.001 | 1077 | 1821 | 1.7  | 1.2  | -1.3 |
| <i>NUP93</i>    | nucleoporin 93                                              | 202188_at    | 2.580 | 0.001 | 431  | 664  | 1.5  | 1.1  | -2.1 |
| <i>TGM2</i>     | transglutaminase 2                                          | 201042_at    | 2.580 | 0.001 | 154  | 336  | 2.2  | 2.0  | 6.1  |
| <i>FCRLA</i>    | Fc receptor like A                                          | 235372_at    | 2.579 | 0.001 | 376  | 645  | 1.7  | 2.8  | -2.5 |
| <i>CDK16</i>    | cyclin dependent kinase 16                                  | 208824_x_at  | 2.577 | 0.001 | 281  | 431  | 1.5  | 1.2  | 1.2  |
| <i>SCRG1</i>    | stimulator of chondrogenesis 1                              | 205475_at    | 2.572 | 0.001 | 94   | 797  | 8.5  | -1.2 | 13.0 |
| <i>RPL38</i>    | ribosomal protein L38                                       | 221943_x_at  | 2.559 | 0.001 | 1058 | 1591 | 1.5  | -1.8 | 1.0  |
| <i>TMEM229B</i> | transmembrane protein 229B                                  | 227544_at    | 2.554 | 0.001 | 253  | 414  | 1.6  | 1.1  | 1.0  |

|                |                                                     |             |       |       |      |      |     |      |      |
|----------------|-----------------------------------------------------|-------------|-------|-------|------|------|-----|------|------|
| <i>DUSP6</i>   | dual specificity phosphatase 6                      | 208892_s_at | 2.551 | 0.001 | 810  | 1644 | 2.0 | 1.4  | 22.5 |
| <i>PLOD2</i>   | procollagen-lysine,2-oxoglutarate 5-dioxygenase 2   | 202619_s_at | 2.548 | 0.001 | 180  | 393  | 2.2 | 1.9  | 3.8  |
| <i>WDR77</i>   | WD repeat domain 77                                 | 201421_s_at | 2.545 | 0.001 | 331  | 510  | 1.5 | 1.3  | 1.6  |
| <i>FAM210B</i> | family with sequence similarity 210 member B        | 224690_at   | 2.545 | 0.001 | 1404 | 2309 | 1.6 | 1.2  | -1.5 |
| <i>S100A6</i>  | S100 calcium binding protein A6                     | 217728_at   | 2.528 | 0.001 | 4254 | 6431 | 1.5 | 1.4  | 2.6  |
| <i>ST3GAL6</i> | ST3 beta-galactoside alpha-2,3-sialyltransferase 6  | 210942_s_at | 2.526 | 0.001 | 335  | 700  | 2.1 | -1.7 | -2.8 |
| <i>NT5DC3</i>  | 5'-nucleotidase domain containing 3                 | 218786_at   | 2.521 | 0.001 | 141  | 278  | 2.0 | 1.5  | 1.2  |
| <i>METRN</i>   | meteorin, glial cell differentiation regulator      | 219051_x_at | 2.519 | 0.001 | 175  | 341  | 1.9 | 1.2  | -1.1 |
| <i>ERBB3</i>   | erb-b2 receptor tyrosine kinase 3                   | 226213_at   | 2.517 | 0.001 | 2011 | 3310 | 1.6 | -1.5 | -1.5 |
| <i>GAS7</i>    | growth arrest specific 7                            | 207704_s_at | 2.516 | 0.001 | 443  | 698  | 1.6 | -1.2 | 3.7  |
| <i>ZNF697</i>  | zinc finger protein 697                             | 227080_at   | 2.515 | 0.001 | 516  | 1132 | 2.2 | 1.8  | 2.9  |
| <i>GPRC5B</i>  | G protein-coupled receptor class C group 5 member B | 203632_s_at | 2.503 | 0.001 | 328  | 598  | 1.8 | -1.9 | -2.9 |
| <i>KIRREL1</i> | kirre like nephrin family adhesion molecule 1       | 225303_at   | 2.499 | 0.001 | 293  | 593  | 2.0 | 1.6  | 3.5  |
| <i>PXN</i>     | paxillin                                            | 201087_at   | 2.488 | 0.001 | 316  | 491  | 1.6 | 1.2  | 2.0  |
| <i>CNPY2</i>   | canopy FGF signaling regulator 2                    | 209796_s_at | 2.468 | 0.001 | 583  | 907  | 1.6 | 1.4  | 1.4  |
| <i>NPAS2</i>   | neuronal PAS domain protein 2                       | 213462_at   | 2.462 | 0.001 | 160  | 321  | 2.0 | -1.1 | 1.8  |
| <i>VEGFA</i>   | vascular endothelial growth factor A                | 212171_x_at | 2.461 | 0.001 | 338  | 537  | 1.6 | 1.5  | 2.8  |
| <i>BRI3</i>    | brain protein I3                                    | 223376_s_at | 2.447 | 0.001 | 1188 | 2125 | 1.8 | 1.0  | -1.6 |
| <i>OLIG1</i>   | oligodendrocyte transcription factor 1              | 228170_at   | 2.442 | 0.001 | 29   | 165  | 5.7 | 5.8  | 1.3  |
| <i>ARFGAP1</i> | ADP ribosylation factor GTPase activating protein 1 | 234001_s_at | 2.430 | 0.001 | 215  | 399  | 1.9 | 1.2  | -1.5 |
| <i>PLOD1</i>   | procollagen-lysine,2-oxoglutarate 5-dioxygenase 1   | 200827_at   | 2.428 | 0.001 | 371  | 721  | 1.9 | 1.4  | 4.7  |
| <i>SELENON</i> | selenoprotein N                                     | 224659_at   | 2.427 | 0.001 | 292  | 544  | 1.9 | 1.1  | 1.5  |
| <i>TMEM98</i>  | transmembrane protein 98                            | 223170_at   | 2.410 | 0.001 | 684  | 1314 | 1.9 | -1.3 | -2.6 |
| <i>ABCD1</i>   | ATP binding cassette subfamily D member 1           | 205142_x_at | 2.405 | 0.001 | 244  | 501  | 2.1 | 1.4  | -1.9 |

|                 |                                                                |             |       |       |      |      |     |      |       |
|-----------------|----------------------------------------------------------------|-------------|-------|-------|------|------|-----|------|-------|
| <i>GNG11</i>    | G protein subunit gamma 11                                     | 204115_at   | 2.403 | 0.001 | 455  | 890  | 2.0 | 1.3  | 1.7   |
| <i>TOMM34</i>   | translocase of outer mitochondrial membrane 34                 | 201870_at   | 2.390 | 0.001 | 310  | 473  | 1.5 | 1.2  | 1.9   |
| <i>TIMM50</i>   | translocase of inner mitochondrial membrane 50                 | 224913_s_at | 2.387 | 0.001 | 486  | 772  | 1.6 | 1.8  | 1.2   |
| <i>WIPF1</i>    | WAS/WASL interacting protein family member 1                   | 202665_s_at | 2.387 | 0.001 | 212  | 406  | 1.9 | 1.7  | 2.2   |
| <i>ACTN4</i>    | actinin alpha 4                                                | 200601_at   | 2.386 | 0.001 | 937  | 1474 | 1.6 | -1.2 | 2.9   |
| <i>CCDC50</i>   | coiled-coil domain containing 50                               | 225331_at   | 2.383 | 0.001 | 620  | 1041 | 1.7 | 1.0  | -1.2  |
| <i>ENTPD6</i>   | ectonucleoside triphosphate diphosphohydrolase 6               | 201704_at   | 2.381 | 0.001 | 331  | 529  | 1.6 | 1.3  | 2.4   |
| <i>ZNF827</i>   | zinc finger protein 827                                        | 243618_s_at | 2.378 | 0.001 | 206  | 485  | 2.4 | 1.6  | 2.9   |
| <i>MRGBP</i>    | MRG domain binding protein                                     | 218586_at   | 2.376 | 0.001 | 116  | 318  | 2.7 | 1.7  | 1.3   |
| <i>CERS2</i>    | ceramide synthase 2                                            | 222212_s_at | 2.370 | 0.001 | 919  | 1469 | 1.6 | 1.1  | -1.2  |
| <i>GSS</i>      | glutathione synthetase                                         | 211630_s_at | 2.367 | 0.001 | 423  | 652  | 1.5 | 1.2  | 1.9   |
| <i>ROPN1</i>    | rhopilin associated tail protein 1                             | 231535_x_at | 2.361 | 0.001 | 232  | 491  | 2.1 | -1.1 | 1.3   |
| <i>PFKFB4</i>   | 6-phosphofructo-2-kinase/fructose-2,6-biphosphatase 4          | 228499_at   | 2.349 | 0.001 | 239  | 416  | 1.7 | 1.8  | 3.5   |
| <i>ZMAT3</i>    | zinc finger matrin-type 3                                      | 219628_at   | 2.348 | 0.001 | 674  | 1023 | 1.5 | 1.0  | -2.7  |
| <i>PCDH9</i>    | protocadherin 9                                                | 219737_s_at | 2.348 | 0.001 | 92   | 213  | 2.3 | 1.7  | 2.2   |
| <i>CTHRC1</i>   | collagen triple helix repeat containing 1                      | 225681_at   | 2.326 | 0.001 | 1929 | 3364 | 1.7 | 4.4  | 102.7 |
| <i>TIMP1</i>    | TIMP metallopeptidase inhibitor 1                              | 201666_at   | 2.322 | 0.001 | 3222 | 6096 | 1.9 | 2.4  | 2.3   |
| <i>GDF15</i>    | growth differentiation factor 15                               | 221577_x_at | 2.321 | 0.001 | 274  | 881  | 3.2 | 4.1  | 4.9   |
| <i>ITGB3</i>    | integrin subunit beta 3                                        | 204627_s_at | 2.318 | 0.001 | 71   | 236  | 3.3 | 3.4  | 16.5  |
| <i>TMC6</i>     | transmembrane channel like 6                                   | 204328_at   | 2.318 | 0.001 | 320  | 515  | 1.6 | 1.2  | 1.2   |
| <i>BEST1</i>    | bestrophin 1                                                   | 1554442_at  | 2.313 | 0.001 | 360  | 576  | 1.6 | 1.2  | ND    |
| <i>TMEM106C</i> | transmembrane protein 106C                                     | 201764_at   | 2.301 | 0.001 | 591  | 903  | 1.5 | 1.4  | 1.9   |
| <i>SPRY4</i>    | sprouty RTK signaling antagonist 4                             | 221489_s_at | 2.291 | 0.001 | 472  | 1078 | 2.3 | 1.0  | 13.2  |
| <i>OSBPL10</i>  | oxysterol binding protein like 10                              | 219073_s_at | 2.278 | 0.001 | 254  | 544  | 2.1 | 1.4  | 3.1   |
| <i>SLC16A3</i>  | solute carrier family 16 member 3                              | 202856_s_at | 2.272 | 0.001 | 103  | 288  | 2.8 | 3.6  | 10.5  |
| <i>HEY1</i>     | hes related family bHLH transcription factor with YRPW motif 1 | 44783_s_at  | 2.269 | 0.001 | 997  | 1843 | 1.8 | 3.1  | 1.6   |

|                 |                                                  |              |       |       |      |      |     |      |       |
|-----------------|--------------------------------------------------|--------------|-------|-------|------|------|-----|------|-------|
| <i>ZNF362</i>   | zinc finger protein 362                          | 226820_at    | 2.267 | 0.001 | 674  | 1095 | 1.6 | -1.2 | -1.1  |
| <i>COL4A1</i>   | collagen type IV alpha 1 chain                   | 211981_at    | 2.267 | 0.001 | 614  | 1088 | 1.8 | 3.0  | 2.7   |
| <i>FUCA2</i>    | alpha-L-fucosidase 2                             | 223120_at    | 2.262 | 0.001 | 446  | 755  | 1.7 | 1.4  | -1.1  |
| <i>PIK3R3</i>   | phosphoinositide-3-kinase regulatory subunit 3   | 202743_at    | 2.246 | 0.001 | 236  | 598  | 2.5 | 4.0  | -2.5  |
| <i>ARNT2</i>    | aryl hydrocarbon receptor nuclear translocator 2 | 202986_at    | 2.244 | 0.001 | 179  | 380  | 2.1 | -1.4 | -1.3  |
| <i>SV2A</i>     | synaptic vesicle glycoprotein 2A                 | 203069_at    | 2.241 | 0.001 | 145  | 303  | 2.1 | 1.3  | 1.3   |
| <i>COL4A2</i>   | collagen type IV alpha 2 chain                   | 211964_at    | 2.238 | 0.001 | 1324 | 2396 | 1.8 | 2.4  | 2.0   |
| <i>LGALS1</i>   | galectin 1                                       | 201105_at    | 2.235 | 0.001 | 5608 | 9216 | 1.6 | 1.7  | 1.3   |
| <i>LY6E</i>     | lymphocyte antigen 6 family member E             | 202145_at    | 2.229 | 0.001 | 865  | 1365 | 1.6 | 1.5  | 3.1   |
| <i>LOXL3</i>    | lysyl oxidase like 3                             | 228253_at    | 2.227 | 0.001 | 207  | 528  | 2.6 | 1.9  | 7.8   |
| <i>WDR91</i>    | WD repeat domain 91                              | 218971_s_at  | 2.221 | 0.001 | 232  | 422  | 1.8 | 1.2  | -1.9  |
| <i>COL11A2</i>  | collagen type XI alpha 2 chain                   | 213870_at    | 2.219 | 0.001 | 123  | 244  | 2.0 | -1.1 | 1.2   |
| <i>PLPP4</i>    | phospholipid phosphatase 4                       | 236044_at    | 2.219 | 0.001 | 93   | 241  | 2.6 | 1.2  | 1.4   |
| <i>MAGED2</i>   | MAGE family member D2                            | 208682_s_at  | 2.218 | 0.001 | 662  | 1246 | 1.9 | 1.0  | -1.2  |
| <i>ATP6VOE2</i> | ATPase H <sup>+</sup> transporting V0 subunit e2 | 213587_s_at  | 2.211 | 0.001 | 443  | 899  | 2.0 | 2.1  | 4.3   |
| <i>WARS</i>     | tryptophanyl-tRNA synthetase                     | 200629_at    | 2.205 | 0.001 | 1342 | 2308 | 1.7 | 4.4  | 1.3   |
| <i>MLPH</i>     | melanophilin                                     | 218211_s_at  | 2.204 | 0.001 | 1284 | 2403 | 1.9 | -1.1 | -7.2  |
| <i>FAM222B</i>  | family with sequence similarity 222 member B     | 218464_s_at  | 2.203 | 0.001 | 503  | 816  | 1.6 | 1.0  | 1.0   |
| <i>MMP1</i>     | matrix metalloproteinase 1                       | 204475_at    | 2.195 | 0.001 | 452  | 2068 | 4.6 | 48.3 | 161.9 |
| <i>EIF5A</i>    | eukaryotic translation initiation factor 5A      | 213753_x_at  | 2.195 | 0.001 | 450  | 681  | 1.5 | -1.5 | 1.3   |
| <i>CD276</i>    | CD276 molecule                                   | 224859_at    | 2.184 | 0.001 | 556  | 924  | 1.7 | 1.1  | 1.2   |
| <i>MCM7</i>     | minichromosome maintenance complex component 7   | 208795_s_at  | 2.182 | 0.001 | 434  | 710  | 1.6 | 1.3  | 3.9   |
| <i>OAF</i>      | out at first homolog                             | 225510_at    | 2.177 | 0.001 | 362  | 556  | 1.5 | 1.3  | 1.8   |
| <i>GBAP1</i>    | glucosylceramidase beta pseudogene 1             | 210589_s_at  | 2.175 | 0.001 | 498  | 837  | 1.7 | 1.5  | -1.1  |
| <i>SOX13</i>    | SRY-box 13                                       | 209736_at    | 2.174 | 0.002 | 294  | 450  | 1.5 | 1.1  | -2.1  |
| <i>TMEM163</i>  | transmembrane protein 163                        | 1552626_a_at | 2.174 | 0.002 | 237  | 955  | 4.0 | 5.3  | ND    |

|                |                                                     |             |       |       |      |      |     |      |      |
|----------------|-----------------------------------------------------|-------------|-------|-------|------|------|-----|------|------|
| <i>SPP1</i>    | secreted phosphoprotein 1                           | 209875_s_at | 2.167 | 0.002 | 1695 | 4095 | 2.4 | 52.5 | 7.1  |
| <i>COL5A1</i>  | collagen type V alpha 1 chain                       | 212489_at   | 2.167 | 0.002 | 351  | 687  | 2.0 | 1.8  | 1.2  |
| <i>TUSC3</i>   | tumor suppressor candidate 3                        | 213423_x_at | 2.163 | 0.002 | 371  | 637  | 1.7 | -1.2 | 4.6  |
| <i>YTHDF1</i>  | YTH N6-methyladenosine RNA binding protein 1        | 221741_s_at | 2.162 | 0.002 | 814  | 1269 | 1.6 | 1.2  | -1.1 |
| <i>SEMA4C</i>  | semaphorin 4C                                       | 46665_at    | 2.157 | 0.002 | 833  | 1386 | 1.7 | -1.1 | -1.6 |
| <i>AEBP1</i>   | AE binding protein 1                                | 201792_at   | 2.150 | 0.002 | 1590 | 3346 | 2.1 | 2.0  | -3.6 |
| <i>USP13</i>   | ubiquitin specific peptidase 13                     | 205356_at   | 2.138 | 0.002 | 427  | 791  | 1.9 | 1.1  | 2.3  |
| <i>WFDC1</i>   | WAP four-disulfide core domain 1                    | 219478_at   | 2.131 | 0.002 | 146  | 306  | 2.1 | 1.7  | 1.0  |
| <i>DAAM2</i>   | dishevelled associated activator of morphogenesis 2 | 212793_at   | 2.131 | 0.002 | 301  | 512  | 1.7 | 1.1  | 1.2  |
| <i>IGFBP5</i>  | insulin like growth factor binding protein 5        | 211959_at   | 2.129 | 0.002 | 1225 | 2252 | 1.8 | 1.0  | 1.6  |
| <i>IGSF3</i>   | immunoglobulin superfamily member 3                 | 202421_at   | 2.124 | 0.002 | 1088 | 1830 | 1.7 | 1.0  | -1.4 |
| <i>FKBP9</i>   | FKBP prolyl isomerase 9                             | 212169_at   | 2.120 | 0.002 | 781  | 1260 | 1.6 | -1.4 | 1.2  |
| <i>IQGAP3</i>  | IQ motif containing GTPase activating protein 3     | 229538_s_at | 2.119 | 0.002 | 113  | 214  | 1.9 | 2.0  | 3.5  |
| <i>GNAI2</i>   | G protein subunit alpha i2                          | 201040_at   | 2.117 | 0.002 | 639  | 1156 | 1.8 | 1.2  | 1.2  |
| <i>SHROOM2</i> | shroom family member 2                              | 204967_at   | 2.113 | 0.002 | 229  | 426  | 1.9 | 1.4  | 3.1  |
| <i>PHF19</i>   | PHD finger protein 19                               | 227212_s_at | 2.112 | 0.002 | 162  | 306  | 1.9 | 1.7  | 5.1  |
| <i>GSTO1</i>   | glutathione S-transferase omega 1                   | 201470_at   | 2.110 | 0.002 | 2029 | 3264 | 1.6 | 1.6  | -3.0 |
| <i>RHBDF1</i>  | rhomboid 5 homolog 1                                | 218686_s_at | 2.109 | 0.002 | 391  | 614  | 1.6 | 1.0  | 1.3  |
| <i>PARP1</i>   | poly(ADP-ribose) polymerase 1                       | 208644_at   | 2.091 | 0.002 | 601  | 910  | 1.5 | 1.4  | 1.6  |
| <i>GYPC</i>    | glycophorin C (Gerbich blood group)                 | 202947_s_at | 2.087 | 0.002 | 904  | 1624 | 1.8 | 1.0  | -1.5 |
| <i>VGFB</i>    | VGFB nerve growth factor inducible                  | 205586_x_at | 2.084 | 0.002 | 112  | 348  | 3.1 | 1.9  | 1.8  |
| <i>RAB17</i>   | RAB17, member RAS oncogene family                   | 218931_at   | 2.082 | 0.002 | 231  | 479  | 2.1 | 1.6  | 1.4  |
| <i>B4GAT1</i>  | beta-1,4-glucuronyltransferase 1                    | 203188_at   | 2.080 | 0.002 | 376  | 586  | 1.6 | -1.3 | -1.2 |
| <i>TAF5</i>    | TAF5 chemokine like family member 5                 | 229655_at   | 2.073 | 0.002 | 235  | 497  | 2.1 | -1.1 | -1.7 |
| <i>PNKD</i>    | PNKD metallo-beta-lactamase domain containing       | 233177_s_at | 2.071 | 0.002 | 299  | 512  | 1.7 | 1.8  | 2.5  |
| <i>OLFML3</i>  | olfactomedin like 3                                 | 218162_at   | 2.062 | 0.002 | 534  | 865  | 1.6 | 1.2  | 4.3  |



|                 |                                                      |             |       |       |      |      |     |      |       |
|-----------------|------------------------------------------------------|-------------|-------|-------|------|------|-----|------|-------|
| <i>IL13RA2</i>  | interleukin 13 receptor subunit alpha 2              | 206172_at   | 2.062 | 0.002 | 88   | 308  | 3.5 | 7.2  | 1.2   |
| <i>CABLES2</i>  | Cdk5 and Abl enzyme substrate 2                      | 226004_at   | 2.059 | 0.002 | 159  | 305  | 1.9 | 1.1  | -1.1  |
| <i>SLC7A5</i>   | solute carrier family 7 member 5                     | 201195_s_at | 2.058 | 0.002 | 668  | 1050 | 1.6 | 1.7  | -1.7  |
| <i>CDC42SE1</i> | CDC42 small effector 1                               | 229120_s_at | 2.053 | 0.002 | 642  | 1074 | 1.7 | -1.5 | 1.2   |
| <i>SEPTIN9</i>  | septin 9                                             | 208657_s_at | 2.051 | 0.002 | 286  | 444  | 1.5 | 1.0  | -1.4  |
| <i>SERPINE2</i> | serpin family E member 2                             | 212190_at   | 2.048 | 0.002 | 4795 | 9279 | 1.9 | 1.0  | 3.1   |
| <i>SIRPA</i>    | signal regulatory protein alpha                      | 202896_s_at | 2.048 | 0.002 | 287  | 451  | 1.6 | 1.2  | -5.9  |
| <i>TYRO3</i>    | TYRO3 protein tyrosine kinase                        | 211432_s_at | 2.041 | 0.002 | 347  | 536  | 1.5 | -1.2 | 1.3   |
| <i>PDCD6</i>    | programmed cell death 6                              | 203415_at   | 2.038 | 0.002 | 721  | 1116 | 1.5 | 1.4  | 1.1   |
| <i>USP11</i>    | ubiquitin specific peptidase 11                      | 208723_at   | 2.029 | 0.002 | 513  | 785  | 1.5 | -1.1 | -1.2  |
| <i>IGLL3P</i>   | immunoglobulin lambda like polypeptide 3, pseudogene | 215946_x_at | 2.020 | 0.002 | 224  | 571  | 2.5 | 2.7  | -1.1  |
| <i>ADRM1</i>    | adhesion regulating molecule 1                       | 201281_at   | 2.015 | 0.002 | 635  | 983  | 1.5 | 1.5  | 1.6   |
| <i>TPP1</i>     | tripeptidyl peptidase 1                              | 200742_s_at | 2.012 | 0.002 | 983  | 1496 | 1.5 | -1.4 | -5.2  |
| <i>PAQR8</i>    | progesterin and adipoQ receptor family member 8      | 227626_at   | 2.008 | 0.002 | 210  | 349  | 1.7 | -1.1 | -4.2  |
| <i>APOE</i>     | apolipoprotein E                                     | 203382_s_at | 2.006 | 0.002 | 1655 | 2884 | 1.7 | 1.1  | -22.1 |
| <i>TMEM158</i>  | transmembrane protein 158 (gene/pseudogene)          | 213338_at   | 2.004 | 0.002 | 312  | 791  | 2.5 | 3.4  | 7.0   |
| <i>SLC26A2</i>  | solute carrier family 26 member 2                    | 205097_at   | 2.004 | 0.002 | 639  | 959  | 1.5 | 2.2  | 2.6   |
| <i>MMP14</i>    | matrix metalloproteinase 14                          | 160020_at   | 1.998 | 0.002 | 501  | 882  | 1.8 | 1.0  | 1.0   |
| <i>ADCY1</i>    | adenylate cyclase 1                                  | 213245_at   | 1.998 | 0.002 | 83   | 277  | 3.3 | 2.7  | -1.4  |
| <i>QPRT</i>     | quinolinate phosphoribosyltransferase                | 242414_at   | 1.994 | 0.002 | 470  | 728  | 1.5 | -1.2 | -8.2  |
| <i>LDLRAP1</i>  | low density lipoprotein receptor adaptor protein 1   | 221790_s_at | 1.993 | 0.002 | 193  | 328  | 1.7 | 1.1  | -1.1  |
| <i>AURKA</i>    | aurora kinase A                                      | 204092_s_at | 1.991 | 0.002 | 173  | 332  | 1.9 | 2.6  | 6.5   |
| <i>STC1</i>     | stanniocalcin 1                                      | 204597_x_at | 1.987 | 0.002 | 81   | 244  | 3.0 | 2.5  | 8.7   |
| <i>MED15</i>    | mediator complex subunit 15                          | 222175_s_at | 1.981 | 0.002 | 407  | 790  | 1.9 | 1.2  | -2.0  |
| <i>ASB9</i>     | ankyrin repeat and SOCS box containing 9             | 205673_s_at | 1.978 | 0.002 | 89   | 271  | 3.1 | -1.8 | 1.6   |
| <i>SEMA3B</i>   | semaphorin 3B                                        | 203071_at   | 1.976 | 0.002 | 128  | 268  | 2.1 | 1.3  | 7.8   |

|                 |                                                                            |              |       |       |      |      |     |      |       |
|-----------------|----------------------------------------------------------------------------|--------------|-------|-------|------|------|-----|------|-------|
| <i>MICAL1</i>   | microtubule associated monooxygenase, calponin and LIM domain containing 1 | 218376_s_at  | 1.975 | 0.002 | 300  | 508  | 1.7 | 1.8  | -23.9 |
| <i>GPRC5A</i>   | G protein-coupled receptor class C group 5 member A                        | 203108_at    | 1.974 | 0.002 | 91   | 194  | 2.1 | 1.0  | -2.4  |
| <i>IGSF11</i>   | immunoglobulin superfamily member 11                                       | 228375_at    | 1.971 | 0.002 | 148  | 342  | 2.3 | -3.0 | -15.6 |
| <i>CDK2</i>     | cyclin dependent kinase 2                                                  | 204252_at    | 1.970 | 0.002 | 934  | 1644 | 1.8 | 1.6  | -3.6  |
| <i>SCML4</i>    | Scm polycomb group protein like 4                                          | 1569225_a_at | 1.968 | 0.002 | 60   | 248  | 4.1 | 4.4  | ND    |
| <i>PCBP4</i>    | poly(rC) binding protein 4                                                 | 209361_s_at  | 1.956 | 0.002 | 220  | 347  | 1.6 | 1.1  | 1.2   |
| <i>CDH19</i>    | cadherin 19                                                                | 206898_at    | 1.955 | 0.002 | 525  | 1187 | 2.3 | -1.2 | 1.0   |
| <i>IGKC</i>     | immunoglobulin kappa constant                                              | 214669_x_at  | 1.951 | 0.002 | 1083 | 2813 | 2.6 | 8.4  | 1.1   |
| <i>QDPR</i>     | quinoid dihydropteridine reductase                                         | 209123_at    | 1.950 | 0.002 | 1100 | 2066 | 1.9 | 1.7  | -3.9  |
| <i>LAMA4</i>    | laminin subunit alpha 4                                                    | 202202_s_at  | 1.944 | 0.002 | 580  | 1113 | 1.9 | 1.3  | 9.4   |
| <i>GYG2</i>     | glycogenin 2                                                               | 210964_s_at  | 1.942 | 0.002 | 219  | 427  | 1.9 | -2.1 | -3.6  |
| <i>KRT18</i>    | keratin 18                                                                 | 201596_x_at  | 1.936 | 0.002 | 214  | 415  | 1.9 | 1.6  | 10.1  |
| <i>CPN1</i>     | carboxypeptidase N subunit 1                                               | 206256_at    | 1.936 | 0.002 | 117  | 228  | 2.0 | 1.0  | 1.4   |
| <i>CALU</i>     | calumenin                                                                  | 200756_x_at  | 1.935 | 0.002 | 566  | 880  | 1.6 | 1.7  | 2.8   |
| <i>FARP1</i>    | FERM, ARH/RhoGEF and pleckstrin domain protein 1                           | 201911_s_at  | 1.931 | 0.002 | 372  | 632  | 1.7 | 1.1  | -1.8  |
| <i>GPX1</i>     | glutathione peroxidase 1                                                   | 200736_s_at  | 1.926 | 0.002 | 1962 | 3312 | 1.7 | 1.7  | 3.0   |
| <i>RENBP</i>    | renin binding protein                                                      | 206617_s_at  | 1.925 | 0.002 | 251  | 456  | 1.8 | 1.1  | -2.7  |
| <i>SERPINA5</i> | serpin family A member 5                                                   | 209443_at    | 1.922 | 0.002 | 72   | 178  | 2.5 | 1.1  | 2.8   |
| <i>PHC2</i>     | polyhomeotic homolog 2                                                     | 200919_at    | 1.918 | 0.002 | 703  | 1275 | 1.8 | 1.3  | 1.8   |
| <i>DCPS</i>     | decapping enzyme, scavenger                                                | 218774_at    | 1.916 | 0.002 | 241  | 374  | 1.6 | 1.2  | 2.1   |
| <i>TMEM201</i>  | transmembrane protein 201                                                  | 227617_at    | 1.914 | 0.002 | 304  | 467  | 1.5 | 1.0  | 1.1   |
| <i>TBXA2R</i>   | thromboxane A2 receptor                                                    | 336_at       | 1.912 | 0.002 | 102  | 205  | 2.0 | 1.1  | 1.7   |
| <i>NUP210</i>   | nucleoporin 210                                                            | 213947_s_at  | 1.908 | 0.002 | 222  | 397  | 1.8 | 1.8  | 1.1   |
| <i>TPST1</i>    | tyrosylprotein sulfotransferase 1                                          | 204140_at    | 1.908 | 0.002 | 180  | 361  | 2.0 | 1.8  | 3.0   |
| <i>TGFB1I1</i>  | transforming growth factor beta 1 induced transcript 1                     | 209651_at    | 1.905 | 0.002 | 462  | 751  | 1.6 | -1.4 | -4.3  |
| <i>GSTM4</i>    | glutathione S-transferase mu 4                                             | 204149_s_at  | 1.904 | 0.002 | 129  | 232  | 1.8 | 1.3  | -2.1  |

|                  |                                                    |             |       |       |     |     |     |      |       |
|------------------|----------------------------------------------------|-------------|-------|-------|-----|-----|-----|------|-------|
| <i>ENPP1</i>     | ectonucleotide pyrophosphatase/phosphodiesterase 1 | 205066_s_at | 1.901 | 0.002 | 118 | 234 | 2.0 | 1.4  | 1.1   |
| <i>CYREN</i>     | cell cycle regulator of NHEJ                       | 220949_s_at | 1.898 | 0.002 | 314 | 474 | 1.5 | 1.0  | 2.4   |
| <i>FNDC3B</i>    | fibronectin type III domain containing 3B          | 222692_s_at | 1.894 | 0.002 | 155 | 269 | 1.7 | 1.2  | 2.6   |
| <i>TSPAN14</i>   | tetraspanin 14                                     | 223314_at   | 1.894 | 0.002 | 317 | 512 | 1.6 | -1.1 | 2.4   |
| <i>SPRY1</i>     | sprouty RTK signaling antagonist 1                 | 212558_at   | 1.891 | 0.002 | 478 | 768 | 1.6 | -1.1 | 1.5   |
| <i>TNS2</i>      | tensin 2                                           | 212494_at   | 1.888 | 0.002 | 244 | 371 | 1.5 | 1.0  | 1.0   |
| <i>TNFRSF12A</i> | TNF receptor superfamily member 12A                | 218368_s_at | 1.875 | 0.002 | 259 | 444 | 1.7 | 1.4  | 4.2   |
| <i>MAP3K12</i>   | mitogen-activated protein kinase kinase kinase 12  | 205447_s_at | 1.872 | 0.002 | 166 | 270 | 1.6 | 1.5  | -3.8  |
| <i>SLC39A14</i>  | solute carrier family 39 member 14                 | 212110_at   | 1.871 | 0.002 | 496 | 870 | 1.8 | 1.5  | 2.5   |
| <i>CTXND1</i>    | cortexin domain containing 1                       | 215126_at   | 1.863 | 0.002 | 194 | 535 | 2.8 | -1.9 | 1.2   |
| <i>RPP25</i>     | ribonuclease P and MRP subunit p25                 | 219143_s_at | 1.857 | 0.002 | 177 | 316 | 1.8 | 1.3  | 1.1   |
| <i>CDKN2C</i>    | cyclin dependent kinase inhibitor 2C               | 204159_at   | 1.855 | 0.002 | 358 | 639 | 1.8 | 1.5  | 1.4   |
| <i>STMN3</i>     | stathmin 3                                         | 222557_at   | 1.852 | 0.002 | 294 | 479 | 1.6 | 1.1  | 3.4   |
| <i>TSPAN4</i>    | tetraspanin 4                                      | 209264_s_at | 1.841 | 0.002 | 382 | 621 | 1.6 | 1.0  | 1.3   |
| <i>CENPF</i>     | centromere protein F                               | 207828_s_at | 1.834 | 0.002 | 327 | 523 | 1.6 | 3.0  | 4.5   |
| <i>ASRGL1</i>    | asparaginase like 1                                | 222764_at   | 1.832 | 0.002 | 98  | 260 | 2.7 | 2.2  | 1.4   |
| <i>SNHG17</i>    | small nucleolar RNA host gene 17                   | 225857_s_at | 1.831 | 0.002 | 479 | 723 | 1.5 | 1.3  | 2.1   |
| <i>RUBCNL</i>    | rubicon like autophagy enhancer                    | 219471_at   | 1.831 | 0.002 | 231 | 413 | 1.8 | 1.8  | 1.2   |
| <i>SPRY4-IT1</i> | SPRY4 intronic transcript 1                        | 1566968_at  | 1.821 | 0.002 | 271 | 571 | 2.1 | 1.9  | ND    |
| <i>STAG3L4</i>   | stromal antigen 3-like 4 (pseudogene)              | 222801_s_at | 1.817 | 0.002 | 139 | 254 | 1.8 | 1.0  | -1.2  |
| <i>PIR</i>       | pirin                                              | 207469_s_at | 1.811 | 0.002 | 607 | 947 | 1.6 | -1.7 | -10.4 |
| <i>COMMD4</i>    | COMM domain containing 4                           | 209132_s_at | 1.810 | 0.002 | 444 | 675 | 1.5 | 1.2  | -1.5  |
| <i>DCBLD2</i>    | discoidin, CUB and LCCL domain containing 2        | 224911_s_at | 1.809 | 0.002 | 283 | 612 | 2.2 | 1.7  | 2.4   |
| <i>BGN</i>       | biglycan                                           | 213905_x_at | 1.808 | 0.002 | 365 | 589 | 1.6 | 1.2  | 2.3   |
| <i>PABPC1L</i>   | poly(A) binding protein cytoplasmic 1 like         | 226670_s_at | 1.802 | 0.002 | 325 | 609 | 1.9 | 3.0  | 1.0   |
| <i>RPS6KA2</i>   | ribosomal protein S6 kinase A2                     | 212912_at   | 1.800 | 0.002 | 304 | 562 | 1.9 | 1.4  | -9.8  |

|                  |                                                                   |              |       |       |      |      |     |      |      |
|------------------|-------------------------------------------------------------------|--------------|-------|-------|------|------|-----|------|------|
| <i>PTPN1</i>     | protein tyrosine phosphatase non-receptor type 1                  | 202716_at    | 1.800 | 0.002 | 271  | 493  | 1.8 | 1.2  | -1.5 |
| <i>AMPD2</i>     | adenosine monophosphate deaminase 2                               | 212360_at    | 1.789 | 0.002 | 295  | 469  | 1.6 | 1.1  | 1.4  |
| <i>AP1S2</i>     | adaptor related protein complex 1 subunit sigma 2                 | 230264_s_at  | 1.787 | 0.002 | 1687 | 2600 | 1.5 | 1.7  | -2.2 |
| <i>ADAM12</i>    | ADAM metallopeptidase domain 12                                   | 202952_s_at  | 1.783 | 0.002 | 108  | 247  | 2.3 | 2.7  | 4.1  |
| <i>GPR161</i>    | G protein-coupled receptor 161                                    | 214104_at    | 1.782 | 0.002 | 184  | 328  | 1.8 | 1.7  | -1.6 |
| <i>CPOX</i>      | coproporphyrinogen oxidase                                        | 204172_at    | 1.781 | 0.002 | 220  | 355  | 1.6 | 1.0  | 1.4  |
| <i>SYNGR1</i>    | synaptogyrin 1                                                    | 210613_s_at  | 1.781 | 0.002 | 505  | 778  | 1.5 | -1.1 | -6.5 |
| <i>RXRG</i>      | retinoid X receptor gamma                                         | 205954_at    | 1.780 | 0.002 | 82   | 195  | 2.4 | -2.0 | -1.2 |
| <i>RPS10</i>     | ribosomal protein S10                                             | 214001_x_at  | 1.775 | 0.002 | 243  | 406  | 1.7 | -2.5 | 1.0  |
| <i>DTYMK</i>     | deoxythymidylate kinase                                           | 1553984_s_at | 1.766 | 0.002 | 434  | 667  | 1.5 | 1.7  | ND   |
| <i>NEDD9</i>     | neural precursor cell expressed, developmentally down-regulated 9 | 202149_at    | 1.766 | 0.002 | 330  | 518  | 1.6 | 1.1  | 1.4  |
| <i>COL12A1</i>   | collagen type XII alpha 1 chain                                   | 225664_at    | 1.765 | 0.002 | 919  | 1508 | 1.6 | 1.6  | 10.4 |
| <i>PXDN</i>      | peroxidasin                                                       | 212013_at    | 1.764 | 0.002 | 102  | 258  | 2.5 | 1.8  | 13.3 |
| <i>TYW3</i>      | tRNA-yW synthesizing protein 3 homolog                            | 227141_at    | 1.762 | 0.002 | 305  | 490  | 1.6 | 1.2  | 2.0  |
| <i>LINC00622</i> | long intergenic non-protein coding RNA 622                        | 1558404_at   | 1.761 | 0.002 | 96   | 218  | 2.3 | 2.9  | ND   |
| <i>ITPK1</i>     | inositol-tetrakisphosphate 1-kinase                               | 210740_s_at  | 1.759 | 0.002 | 348  | 532  | 1.5 | -1.1 | 1.2  |
| <i>CRELD2</i>    | cysteine rich with EGF like domains 2                             | 218358_at    | 1.754 | 0.002 | 816  | 1736 | 2.1 | 1.9  | 1.9  |
| <i>COL11A1</i>   | collagen type XI alpha 1 chain                                    | 37892_at     | 1.752 | 0.002 | 171  | 349  | 2.0 | 1.8  | -1.8 |
| <i>CTSB</i>      | cathepsin B                                                       | 200838_at    | 1.751 | 0.002 | 4037 | 6115 | 1.5 | 2.1  | 1.0  |
| <i>FOXM1</i>     | forkhead box M1                                                   | 202580_x_at  | 1.748 | 0.002 | 103  | 209  | 2.0 | 2.2  | 6.7  |
| <i>HTRA1</i>     | HtrA serine peptidase 1                                           | 201185_at    | 1.746 | 0.002 | 1139 | 1797 | 1.6 | 1.2  | -1.4 |
| <i>BMP8B</i>     | bone morphogenetic protein 8b                                     | 235275_at    | 1.742 | 0.002 | 138  | 399  | 2.9 | 2.0  | 6.7  |
| <i>NDUFAF3</i>   | NADH:ubiquinone oxidoreductase complex assembly factor 3          | 209177_at    | 1.741 | 0.002 | 385  | 634  | 1.6 | 1.1  | -1.3 |
| <i>CDCA3</i>     | cell division cycle associated 3                                  | 223307_at    | 1.738 | 0.002 | 187  | 305  | 1.6 | 1.8  | 4.6  |
| <i>ST3GAL5</i>   | ST3 beta-galactoside alpha-2,3-sialyltransferase 5                | 203217_s_at  | 1.737 | 0.002 | 685  | 1137 | 1.7 | 1.1  | -2.2 |
| <i>TMEM255A</i>  | transmembrane protein 255A                                        | 219895_at    | 1.736 | 0.002 | 103  | 296  | 2.9 | 1.7  | 1.4  |

|                  |                                                    |             |       |       |      |      |     |      |      |
|------------------|----------------------------------------------------|-------------|-------|-------|------|------|-----|------|------|
| <i>GREB1</i>     | growth regulating estrogen receptor binding 1      | 205862_at   | 1.735 | 0.002 | 128  | 322  | 2.5 | 1.2  | -5.0 |
| <i>COL5A3</i>    | collagen type V alpha 3 chain                      | 52255_s_at  | 1.732 | 0.002 | 256  | 394  | 1.5 | 1.2  | 1.5  |
| <i>MLXIP</i>     | MLX interacting protein                            | 202519_at   | 1.725 | 0.002 | 420  | 700  | 1.7 | 1.3  | -2.1 |
| <i>PRC1</i>      | protein regulator of cytokinesis 1                 | 218009_s_at | 1.719 | 0.002 | 302  | 494  | 1.6 | 2.0  | 15.8 |
| <i>GNS</i>       | glucosamine (N-acetyl)-6-sulfatase                 | 212334_at   | 1.719 | 0.002 | 1507 | 2374 | 1.6 | 1.3  | -1.5 |
| <i>ISYNA1</i>    | inositol-3-phosphate synthase 1                    | 222240_s_at | 1.716 | 0.002 | 161  | 264  | 1.6 | 1.1  | 1.0  |
| <i>TIMP2</i>     | TIMP metalloproteinase inhibitor 2                 | 203167_at   | 1.714 | 0.002 | 605  | 995  | 1.6 | 1.6  | -4.8 |
| <i>HTRA2</i>     | HtrA serine peptidase 2                            | 203089_s_at | 1.714 | 0.002 | 417  | 664  | 1.6 | 1.2  | 1.5  |
| <i>ST3GAL4</i>   | ST3 beta-galactoside alpha-2,3-sialyltransferase 4 | 203759_at   | 1.712 | 0.002 | 196  | 349  | 1.8 | -1.3 | 1.0  |
| <i>CENPN</i>     | centromere protein N                               | 228559_at   | 1.711 | 0.002 | 170  | 272  | 1.6 | 1.8  | 1.9  |
| <i>CLCC1</i>     | chloride channel CLIC like 1                       | 213628_at   | 1.710 | 0.002 | 212  | 327  | 1.5 | 1.0  | 1.4  |
| <i>LRMDA</i>     | leucine rich melanocyte differentiation associated | 223703_at   | 1.704 | 0.002 | 194  | 309  | 1.6 | -1.2 | -3.9 |
| <i>FMN1</i>      | formin 1                                           | 238621_at   | 1.701 | 0.002 | 240  | 442  | 1.8 | 1.0  | -3.9 |
| <i>VEGFB</i>     | vascular endothelial growth factor B               | 203683_s_at | 1.698 | 0.002 | 223  | 337  | 1.5 | -1.1 | -3.3 |
| <i>CORO2B</i>    | coronin 2B                                         | 209789_at   | 1.692 | 0.002 | 158  | 352  | 2.2 | -4.7 | -1.1 |
| <i>LINC00888</i> | long intergenic non-protein coding RNA 888         | 236798_at   | 1.691 | 0.002 | 135  | 276  | 2.0 | 1.6  | 1.0  |
| <i>CDC20</i>     | cell division cycle 20                             | 202870_s_at | 1.691 | 0.002 | 185  | 333  | 1.8 | 2.3  | 26.7 |
| <i>PDE3B</i>     | phosphodiesterase 3B                               | 214582_at   | 1.689 | 0.002 | 149  | 323  | 2.2 | 1.6  | -2.4 |
| <i>COL15A1</i>   | collagen type XV alpha 1 chain                     | 203477_at   | 1.688 | 0.002 | 1607 | 2653 | 1.7 | 2.1  | 8.6  |
| <i>DAG1</i>      | dystroglycan 1                                     | 205417_s_at | 1.686 | 0.002 | 894  | 1376 | 1.5 | 1.0  | 1.8  |
| <i>BCAR3</i>     | BCAR3 adaptor protein, NSP family member           | 204032_at   | 1.682 | 0.002 | 126  | 306  | 2.4 | 1.0  | 1.0  |
| <i>PLXND1</i>    | plexin D1                                          | 38671_at    | 1.681 | 0.002 | 638  | 1011 | 1.6 | 1.2  | -1.2 |
| <i>MPV17</i>     | mitochondrial inner membrane protein MPV17         | 203466_at   | 1.680 | 0.002 | 423  | 653  | 1.5 | 1.1  | -1.9 |
| <i>GDF11</i>     | growth differentiation factor 11                   | 226234_at   | 1.677 | 0.002 | 89   | 204  | 2.3 | 1.2  | -1.8 |
| <i>S100A13</i>   | S100 calcium binding protein A13                   | 202598_at   | 1.672 | 0.002 | 1283 | 2013 | 1.6 | 1.3  | -1.8 |
| <i>HPCAL1</i>    | hippocalcin like 1                                 | 212552_at   | 1.665 | 0.002 | 828  | 1430 | 1.7 | 1.4  | 1.3  |
| <i>HMG2</i>      | high mobility group AT-hook 2                      | 208025_s_at | 1.663 | 0.002 | 50   | 173  | 3.4 | 2.0  | 11.5 |

|                |                                                    |              |       |       |      |      |     |      |       |
|----------------|----------------------------------------------------|--------------|-------|-------|------|------|-----|------|-------|
| <i>IFFO1</i>   | intermediate filament family orphan 1              | 209721_s_at  | 1.663 | 0.002 | 334  | 515  | 1.5 | 1.1  | -1.2  |
| <i>BST2</i>    | bone marrow stromal cell antigen 2                 | 201641_at    | 1.663 | 0.002 | 439  | 896  | 2.0 | 2.7  | 2.0   |
| <i>MAPK12</i>  | mitogen-activated protein kinase 12                | 206106_at    | 1.660 | 0.002 | 103  | 290  | 2.8 | 1.7  | 1.6   |
| <i>SLC2A10</i> | solute carrier family 2 member 10                  | 221024_s_at  | 1.656 | 0.002 | 211  | 347  | 1.6 | 1.8  | -1.7  |
| <i>STAB1</i>   | stabilin 1                                         | 38487_at     | 1.652 | 0.002 | 618  | 984  | 1.6 | 1.7  | -1.1  |
| <i>PBK</i>     | PDZ binding kinase                                 | 219148_at    | 1.652 | 0.002 | 183  | 320  | 1.7 | 5.2  | 11.7  |
| <i>TMEM51</i>  | transmembrane protein 51                           | 218815_s_at  | 1.650 | 0.002 | 197  | 324  | 1.6 | 1.1  | -2.9  |
| <i>HEXA</i>    | hexosaminidase subunit alpha                       | 201765_s_at  | 1.640 | 0.002 | 878  | 1390 | 1.6 | 1.3  | -4.6  |
| <i>IGLJ3</i>   | immunoglobulin lambda joining 3                    | 216984_x_at  | 1.639 | 0.002 | 171  | 543  | 3.2 | 2.2  | 1.0   |
| <i>NRROS</i>   | negative regulator of reactive oxygen species      | 235359_at    | 1.638 | 0.002 | 148  | 276  | 1.9 | -1.1 | -1.1  |
| <i>CMTM5</i>   | CKLF like MARVEL transmembrane domain containing 5 | 230942_at    | 1.637 | 0.002 | 107  | 218  | 2.0 | -1.4 | -1.4  |
| <i>SLC16A4</i> | solute carrier family 16 member 4                  | 205234_at    | 1.634 | 0.002 | 137  | 273  | 2.0 | -1.2 | 1.6   |
| <i>CCND1</i>   | cyclin D1                                          | 208711_s_at  | 1.628 | 0.003 | 681  | 1096 | 1.6 | 1.1  | 5.1   |
| <i>TMEM223</i> | transmembrane protein 223                          | 220934_s_at  | 1.625 | 0.003 | 229  | 343  | 1.5 | -1.2 | 1.5   |
| <i>SEMA5A</i>  | semaphorin 5A                                      | 229427_at    | 1.624 | 0.003 | 232  | 374  | 1.6 | -1.1 | -2.0  |
| <i>LOXL2</i>   | lysyl oxidase like 2                               | 202998_s_at  | 1.622 | 0.003 | 332  | 536  | 1.6 | 2.1  | 39.2  |
| <i>GUSBP11</i> | GUSB pseudogene 11                                 | 213502_x_at  | 1.621 | 0.003 | 600  | 1233 | 2.1 | 2.5  | -1.6  |
| <i>MCM5</i>    | minichromosome maintenance complex component 5     | 216237_s_at  | 1.621 | 0.003 | 321  | 500  | 1.6 | 1.3  | 7.4   |
| <i>IGHD</i>    | immunoglobulin heavy constant delta                | 214973_x_at  | 1.619 | 0.003 | 161  | 528  | 3.3 | 1.9  | 1.2   |
| <i>LMF1</i>    | lipase maturation factor 1                         | 1569872_a_at | 1.608 | 0.003 | 242  | 421  | 1.7 | -1.3 | ND    |
| <i>MBP</i>     | myelin basic protein                               | 209072_at    | 1.607 | 0.003 | 600  | 1054 | 1.8 | -1.1 | -18.9 |
| <i>IGF2R</i>   | insulin like growth factor 2 receptor              | 201392_s_at  | 1.607 | 0.003 | 364  | 563  | 1.5 | 1.2  | 1.0   |
| <i>SOX8</i>    | SRY-box 8                                          | 226913_s_at  | 1.606 | 0.003 | 121  | 247  | 2.0 | 1.3  | 3.3   |
| <i>SNCA</i>    | synuclein alpha                                    | 204466_s_at  | 1.601 | 0.003 | 1352 | 2027 | 1.5 | -1.1 | -9.5  |
| <i>HIP1</i>    | huntingtin interacting protein 1                   | 226364_at    | 1.599 | 0.003 | 278  | 472  | 1.7 | 1.0  | 1.9   |
| <i>PWAR6</i>   | Prader Willi/Angelman region RNA 6                 | 226587_at    | 1.596 | 0.003 | 212  | 341  | 1.6 | 2.5  | -1.1  |
| <i>GNA14</i>   | G protein subunit alpha 14                         | 220108_at    | 1.590 | 0.003 | 95   | 201  | 2.1 | 1.4  | 1.4   |
| <i>SLC20A1</i> | solute carrier family 20 member 1                  | 201920_at    | 1.586 | 0.003 | 854  | 1780 | 2.1 | 4.6  | 14.9  |
| <i>CFI</i>     | complement factor I                                | 203854_at    | 1.586 | 0.003 | 143  | 249  | 1.7 | 2.7  | 2.4   |

|                |                                                         |             |       |       |      |      |     |      |      |
|----------------|---------------------------------------------------------|-------------|-------|-------|------|------|-----|------|------|
| <i>SLC2A3</i>  | solute carrier family 2 member 3                        | 202497_x_at | 1.581 | 0.003 | 408  | 770  | 1.9 | 2.2  | 1.5  |
| <i>MMP3</i>    | matrix metallopeptidase 3                               | 205828_at   | 1.575 | 0.003 | 156  | 510  | 3.3 | 5.8  | 1.5  |
| <i>MBOAT1</i>  | membrane bound O-acyltransferase domain containing 1    | 227379_at   | 1.572 | 0.003 | 136  | 259  | 1.9 | 1.1  | 1.0  |
| <i>TGFB1</i>   | transforming growth factor beta induced                 | 201506_at   | 1.563 | 0.003 | 1601 | 2596 | 1.6 | -1.5 | 49.5 |
| <i>RRM2</i>    | ribonucleotide reductase regulatory subunit M2          | 209773_s_at | 1.563 | 0.003 | 439  | 687  | 1.6 | 4.1  | 30.9 |
| <i>GAPDHS</i>  | glyceraldehyde-3-phosphate dehydrogenase, spermatogenic | 207116_s_at | 1.562 | 0.003 | 189  | 559  | 3.0 | -2.6 | -1.8 |
| <i>PSMA7</i>   | proteasome subunit alpha 7                              | 216088_s_at | 1.561 | 0.003 | 295  | 469  | 1.6 | 2.2  | 1.3  |
| <i>SPRY2</i>   | sprouty RTK signaling antagonist 2                      | 204011_at   | 1.557 | 0.003 | 382  | 805  | 2.1 | -1.4 | 7.2  |
| <i>PRSS23</i>  | serine protease 23                                      | 202458_at   | 1.553 | 0.003 | 688  | 1054 | 1.5 | -1.3 | 17.0 |
| <i>CCN1</i>    | cellular communication network factor 1                 | 210764_s_at | 1.553 | 0.003 | 288  | 501  | 1.7 | 2.5  | 7.6  |
| <i>APLNR</i>   | apelin receptor                                         | 213592_at   | 1.552 | 0.003 | 284  | 442  | 1.6 | 1.6  | -1.2 |
| <i>CPEB1</i>   | cytoplasmic polyadenylation element binding protein 1   | 219578_s_at | 1.544 | 0.003 | 186  | 294  | 1.6 | 1.0  | -3.4 |
| <i>LZTS1</i>   | leucine zipper tumor suppressor 1                       | 219042_at   | 1.543 | 0.003 | 214  | 345  | 1.6 | -2.5 | -4.5 |
| <i>FDCSP</i>   | follicular dendritic cell secreted protein              | 229152_at   | 1.540 | 0.003 | 55   | 208  | 3.8 | 2.9  | 1.5  |
| <i>EHBP1</i>   | EH domain binding protein 1                             | 212650_at   | 1.540 | 0.003 | 261  | 422  | 1.6 | 1.8  | 1.0  |
| <i>RFC4</i>    | replication factor C subunit 4                          | 204023_at   | 1.539 | 0.003 | 267  | 506  | 1.9 | 2.0  | 5.0  |
| <i>CXCL1</i>   | C-X-C motif chemokine ligand 1                          | 204470_at   | 1.537 | 0.003 | 145  | 454  | 3.1 | 4.4  | 2.2  |
| <i>MFF</i>     | mitochondrial fission factor                            | 222832_s_at | 1.537 | 0.003 | 712  | 1090 | 1.5 | -1.2 | 2.0  |
| <i>PLEKHA2</i> | pleckstrin homology domain containing A2                | 238013_at   | 1.535 | 0.003 | 144  | 259  | 1.8 | 1.0  | -1.5 |
| <i>OLFML2B</i> | olfactomedin like 2B                                    | 213125_at   | 1.533 | 0.003 | 284  | 483  | 1.7 | 2.8  | -1.2 |
| <i>EFEMP2</i>  | EGF containing fibulin extracellular matrix protein 2   | 209356_x_at | 1.530 | 0.003 | 256  | 418  | 1.6 | 1.0  | 1.1  |
| <i>GALE</i>    | UDP-galactose-4-epimerase                               | 202528_at   | 1.530 | 0.003 | 177  | 315  | 1.8 | 1.0  | 2.3  |
| <i>ST6GAL1</i> | ST6 beta-galactoside alpha-2,6-sialyltransferase 1      | 201998_at   | 1.519 | 0.003 | 506  | 759  | 1.5 | -1.2 | -1.6 |

|                 |                                                       |              |       |       |      |      |     |     |      |
|-----------------|-------------------------------------------------------|--------------|-------|-------|------|------|-----|-----|------|
| <i>PLEKHO2</i>  | pleckstrin homology domain containing O2              | 204436_at    | 1.518 | 0.003 | 473  | 720  | 1.5 | 1.1 | -1.6 |
| <i>COTL1</i>    | coactosin like F-actin binding protein 1              | 224583_at    | 1.515 | 0.003 | 742  | 1167 | 1.6 | 2.3 | 13.7 |
| <i>CDCA8</i>    | cell division cycle associated 8                      | 221520_s_at  | 1.513 | 0.003 | 194  | 303  | 1.6 | 1.3 | 3.7  |
| <i>SULF1</i>    | sulfatase 1                                           | 212354_at    | 1.510 | 0.003 | 281  | 492  | 1.8 | 3.2 | 3.9  |
| <i>CCNB2</i>    | cyclin B2                                             | 202705_at    | 1.497 | 0.003 | 282  | 467  | 1.7 | 2.3 | 5.1  |
| <i>GUSB</i>     | glucuronidase beta                                    | 202605_at    | 1.493 | 0.003 | 956  | 1535 | 1.6 | 1.5 | 1.0  |
| <i>EMILIN2</i>  | elastin microfibril interfacier 2                     | 224374_s_at  | 1.492 | 0.003 | 382  | 670  | 1.8 | 1.9 | 1.2  |
| <i>CARD16</i>   | caspase recruitment domain family member 16           | 1552701_a_at | 1.491 | 0.003 | 331  | 632  | 1.9 | 3.8 | ND   |
| <i>TNC</i>      | tenascin C                                            | 201645_at    | 1.488 | 0.003 | 1163 | 2188 | 1.9 | 3.6 | 37.6 |
| <i>BUB1B</i>    | BUB1 mitotic checkpoint serine/threonine kinase B     | 203755_at    | 1.486 | 0.003 | 180  | 335  | 1.9 | 2.4 | 4.4  |
| <i>BANCR</i>    | BRAF-activated non-protein coding RNA                 | 239239_at    | 1.486 | 0.003 | 115  | 240  | 2.1 | 2.4 | 1.2  |
| <i>EGFR</i>     | epidermal growth factor receptor                      | 1565484_x_at | 1.486 | 0.003 | 318  | 532  | 1.7 | 1.1 | ND   |
| <i>PKN1</i>     | protein kinase N1                                     | 202161_at    | 1.481 | 0.003 | 170  | 271  | 1.6 | 1.1 | 1.5  |
| <i>KCTD7</i>    | potassium channel tetramerization domain containing 7 | 213474_at    | 1.481 | 0.003 | 212  | 326  | 1.5 | 1.3 | -2.0 |
| <i>TCN1</i>     | transcobalamin 1                                      | 205513_at    | 1.468 | 0.003 | 387  | 1250 | 3.2 | 8.7 | -1.3 |
| <i>MAD2L2</i>   | mitotic arrest deficient 2 like 2                     | 223234_at    | 1.464 | 0.003 | 359  | 723  | 2.0 | 1.6 | 1.8  |
| <i>KCNJ10</i>   | potassium voltage-gated channel subfamily J member 10 | 228581_at    | 1.460 | 0.003 | 76   | 195  | 2.6 | 2.3 | 1.2  |
| <i>AOC1</i>     | amine oxidase copper containing 1                     | 203559_s_at  | 1.458 | 0.003 | 61   | 169  | 2.8 | 1.8 | -1.1 |
| <i>NELL1</i>    | neural EGFL like 1                                    | 206089_at    | 1.453 | 0.003 | 78   | 215  | 2.8 | 1.5 | 1.0  |
| <i>IGLV2-14</i> | immunoglobulin lambda variable 2-14                   | 217148_x_at  | 1.448 | 0.003 | 338  | 1283 | 3.8 | 2.6 | 1.0  |
| <i>MMP11</i>    | matrix metalloproteinase 11                           | 203878_s_at  | 1.442 | 0.003 | 242  | 389  | 1.6 | 1.6 | -1.1 |
| <i>L1CAM</i>    | L1 cell adhesion molecule                             | 204584_at    | 1.439 | 0.003 | 239  | 935  | 3.9 | 2.3 | -3.3 |
| <i>NNMT</i>     | nicotinamide N-methyltransferase                      | 202238_s_at  | 1.436 | 0.003 | 496  | 920  | 1.9 | 4.0 | 2.2  |
| <i>TDO2</i>     | tryptophan 2,3-dioxygenase                            | 205943_at    | 1.435 | 0.003 | 99   | 216  | 2.2 | 5.9 | 1.1  |
| <i>CADPS</i>    | calcium dependent secretion activator                 | 1568604_a_at | 1.432 | 0.003 | 160  | 324  | 2.0 | 3.8 | ND   |



|                  |                                                                  |              |       |       |      |      |     |      |      |
|------------------|------------------------------------------------------------------|--------------|-------|-------|------|------|-----|------|------|
| <i>C3orf70</i>   | chromosome 3 open reading frame 70                               | 242447_at    | 1.425 | 0.003 | 217  | 357  | 1.6 | -2.1 | 1.4  |
| <i>LINC-PINT</i> | long intergenic non-protein coding RNA, p53 induced transcript   | 228702_at    | 1.424 | 0.003 | 138  | 247  | 1.8 | 1.4  | -1.6 |
| <i>RNASE1</i>    | ribonuclease A family member 1, pancreatic                       | 201785_at    | 1.413 | 0.003 | 2729 | 4430 | 1.6 | 2.9  | 1.2  |
| <i>NPTX2</i>     | neuronal pentraxin 2                                             | 213479_at    | 1.413 | 0.003 | 161  | 393  | 2.4 | -1.4 | 4.6  |
| <i>PEG10</i>     | paternally expressed 10                                          | 212094_at    | 1.408 | 0.003 | 387  | 788  | 2.0 | -1.5 | 4.0  |
| <i>ANO4</i>      | anoctamin 4                                                      | 236420_s_at  | 1.401 | 0.003 | 54   | 260  | 4.9 | 4.4  | 3.6  |
| <i>PLPP5</i>     | phospholipid phosphatase 5                                       | 226150_at    | 1.401 | 0.003 | 172  | 311  | 1.8 | 2.4  | 1.6  |
| <i>SCUBE2</i>    | signal peptide, CUB domain and EGF like domain containing 2      | 219197_s_at  | 1.398 | 0.003 | 325  | 614  | 1.9 | 1.0  | -2.7 |
| <i>CNIH3</i>     | cornichon family AMPA receptor auxiliary protein 3               | 214841_at    | 1.392 | 0.003 | 152  | 394  | 2.6 | 3.8  | 1.0  |
| <i>NT5E</i>      | 5'-nucleotidase ecto                                             | 1553995_a_at | 1.390 | 0.003 | 54   | 201  | 3.8 | 2.5  | ND   |
| <i>FANCI</i>     | FA complementation group I                                       | 213007_at    | 1.390 | 0.003 | 163  | 305  | 1.9 | 1.9  | 2.4  |
| <i>GLB1L</i>     | galactosidase beta 1 like                                        | 206540_at    | 1.382 | 0.003 | 174  | 332  | 1.9 | -1.1 | 1.1  |
| <i>FGF13</i>     | fibroblast growth factor 13                                      | 205110_s_at  | 1.378 | 0.003 | 150  | 253  | 1.7 | 2.9  | 4.3  |
| <i>PLAAT3</i>    | phospholipase A and acyltransferase 3                            | 209581_at    | 1.372 | 0.003 | 323  | 487  | 1.5 | 2.9  | -1.2 |
| <i>CHAD</i>      | chondroadherin                                                   | 206869_at    | 1.371 | 0.003 | 133  | 255  | 1.9 | 1.0  | 1.0  |
| <i>FRMD5</i>     | FERM domain containing 5                                         | 230831_at    | 1.363 | 0.003 | 50   | 162  | 3.2 | 2.0  | 2.5  |
| <i>PLEKHH1</i>   | pleckstrin homology, MyTH4 and FERM domain containing H1         | 225726_s_at  | 1.361 | 0.003 | 465  | 702  | 1.5 | 1.4  | -1.9 |
| <i>ARAP3</i>     | ArfGAP with RhoGAP domain, ankyrin repeat and PH domain 3        | 218950_at    | 1.361 | 0.003 | 204  | 344  | 1.7 | 1.1  | -1.1 |
| <i>C4orf48</i>   | chromosome 4 open reading frame 48                               | 229860_x_at  | 1.358 | 0.003 | 343  | 521  | 1.5 | 1.3  | -2.5 |
| <i>SPRED2</i>    | sprouty related EVH1 domain containing 2                         | 212458_at    | 1.356 | 0.003 | 304  | 481  | 1.6 | -1.1 | 4.7  |
| <i>LAMA1</i>     | laminin subunit alpha 1                                          | 227048_at    | 1.354 | 0.003 | 148  | 293  | 2.0 | 5.8  | 1.7  |
| <i>NOL4L</i>     | nucleolar protein 4 like                                         | 225224_at    | 1.351 | 0.003 | 295  | 475  | 1.6 | 1.7  | 1.3  |
| <i>TRPV2</i>     | transient receptor potential cation channel subfamily V member 2 | 219282_s_at  | 1.349 | 0.003 | 525  | 790  | 1.5 | 1.6  | -2.2 |

|                    |                                                                         |              |       |       |      |      |     |      |       |
|--------------------|-------------------------------------------------------------------------|--------------|-------|-------|------|------|-----|------|-------|
| <i>COL1A1</i>      | collagen type I alpha 1 chain                                           | 202311_s_at  | 1.341 | 0.004 | 1103 | 1692 | 1.5 | 1.7  | 1.1   |
| <i>EVA1A</i>       | eva-1 homolog A, regulator of programmed cell death                     | 227828_s_at  | 1.330 | 0.004 | 174  | 322  | 1.9 | -1.5 | -2.8  |
| <i>IGKV4-1</i>     | immunoglobulin kappa variable 4-1                                       | 214777_at    | 1.325 | 0.004 | 173  | 570  | 3.3 | 3.8  | 1.0   |
| <i>FAM20C</i>      | FAM20C golgi associated secretory pathway kinase                        | 226722_at    | 1.317 | 0.004 | 237  | 388  | 1.6 | 1.6  | 12.6  |
| <i>MICALL2</i>     | MICAL like 2                                                            | 219332_at    | 1.316 | 0.004 | 176  | 286  | 1.6 | 1.8  | 1.6   |
| <i>SLCO4A1-AS1</i> | SLCO4A1 antisense RNA 1                                                 | 1554332_a_at | 1.310 | 0.004 | 294  | 471  | 1.6 | -2.2 | ND    |
| <i>VEPH1</i>       | ventricular zone expressed PH domain containing 1                       | 232122_s_at  | 1.310 | 0.004 | 283  | 463  | 1.6 | -1.5 | -27.6 |
| <i>NPL</i>         | N-acetylneuraminase pyruvate lyase                                      | 240440_at    | 1.309 | 0.004 | 148  | 252  | 1.7 | 3.8  | -2.3  |
| <i>TNIK</i>        | TRAF2 and NCK interacting kinase                                        | 211828_s_at  | 1.308 | 0.004 | 87   | 231  | 2.7 | 2.0  | -1.2  |
| <i>IGHM</i>        | immunoglobulin heavy constant mu                                        | 216491_x_at  | 1.307 | 0.004 | 145  | 499  | 3.4 | 3.5  | 1.0   |
| <i>IGK</i>         | immunoglobulin kappa locus                                              | 211650_x_at  | 1.303 | 0.004 | 120  | 227  | 1.9 | 1.7  | 1.1   |
| <i>PIEZO2</i>      | piezo type mechanosensitive ion channel component 2                     | 219602_s_at  | 1.302 | 0.004 | 128  | 259  | 2.0 | 2.4  | 1.4   |
| <i>TTYH3</i>       | tweety family member 3                                                  | 224674_at    | 1.299 | 0.004 | 884  | 1334 | 1.5 | 1.8  | -1.2  |
| <i>LPXN</i>        | leupaxin                                                                | 216250_s_at  | 1.296 | 0.004 | 533  | 909  | 1.7 | 3.2  | 3.5   |
| <i>THBS1</i>       | thrombospondin 1                                                        | 201108_s_at  | 1.285 | 0.004 | 224  | 427  | 1.9 | 2.3  | 22.1  |
| <i>SAP30</i>       | Sin3A associated protein 30                                             | 204900_x_at  | 1.282 | 0.004 | 269  | 498  | 1.8 | -1.4 | -1.1  |
| <i>TMTC2</i>       | transmembrane and tetratricopeptide repeat containing 2                 | 235775_at    | 1.282 | 0.004 | 193  | 295  | 1.5 | -1.3 | 2.0   |
| <i>POMGNT1</i>     | protein O-linked mannose N-acetylglucosaminyltransferase 1 (beta 1,2- ) | 217944_at    | 1.278 | 0.004 | 319  | 486  | 1.5 | -1.2 | -1.1  |
| <i>HLA-DRB4</i>    | major histocompatibility complex, class II, DR beta 4                   | 209728_at    | 1.277 | 0.004 | 590  | 1160 | 2.0 | 1.8  | 7.1   |
| <i>SLC23A2</i>     | solute carrier family 23 member 2                                       | 209236_at    | 1.269 | 0.004 | 419  | 630  | 1.5 | -1.3 | -1.6  |
| <i>TCIRG1</i>      | T cell immune regulator 1, ATPase H+ transporting V0 subunit a3         | 204158_s_at  | 1.265 | 0.004 | 236  | 412  | 1.7 | 2.2  | 1.4   |
| <i>SSH1</i>        | slingshot protein phosphatase 1                                         | 221752_at    | 1.259 | 0.004 | 323  | 493  | 1.5 | -1.1 | 1.9   |
| <i>DMXL2</i>       | Dmx like 2                                                              | 212820_at    | 1.257 | 0.004 | 254  | 389  | 1.5 | 2.0  | -2.1  |
| <i>SMIM3</i>       | small integral membrane protein 3                                       | 223276_at    | 1.256 | 0.004 | 459  | 788  | 1.7 | 1.3  | 2.8   |

|                  |                                                              |             |       |       |     |      |     |      |      |
|------------------|--------------------------------------------------------------|-------------|-------|-------|-----|------|-----|------|------|
| <i>LARP6</i>     | La ribonucleoprotein domain family member 6                  | 236565_s_at | 1.254 | 0.004 | 197 | 316  | 1.6 | 1.4  | 1.6  |
| <i>KIAA1549L</i> | KIAA1549 like                                                | 235486_at   | 1.253 | 0.004 | 227 | 380  | 1.7 | -2.0 | 1.2  |
| <i>ARHGAP18</i>  | Rho GTPase activating protein 18                             | 225173_at   | 1.252 | 0.004 | 191 | 292  | 1.5 | 2.3  | 1.9  |
| <i>PDGFA</i>     | platelet derived growth factor subunit A                     | 205463_s_at | 1.252 | 0.004 | 201 | 311  | 1.5 | -1.2 | 8.9  |
| <i>PSPH</i>      | phosphoserine phosphatase                                    | 205048_s_at | 1.251 | 0.004 | 234 | 385  | 1.6 | 2.5  | 3.8  |
| <i>IGLL5</i>     | immunoglobulin lambda like polypeptide 5                     | 234764_x_at | 1.248 | 0.004 | 89  | 452  | 5.1 | 5.4  | -1.2 |
| <i>NHLRC3</i>    | NHL repeat containing 3                                      | 227040_at   | 1.243 | 0.004 | 212 | 338  | 1.6 | 1.5  | -2.6 |
| <i>ASL</i>       | argininosuccinate lyase                                      | 204608_at   | 1.237 | 0.004 | 259 | 393  | 1.5 | 1.5  | 1.4  |
| <i>EYA1</i>      | EYA transcriptional coactivator and phosphatase 1            | 214608_s_at | 1.237 | 0.004 | 110 | 211  | 1.9 | 2.2  | 1.2  |
| <i>LDLRAD3</i>   | low density lipoprotein receptor class A domain containing 3 | 234985_at   | 1.234 | 0.004 | 584 | 965  | 1.7 | -1.6 | 2.7  |
| <i>TMED4</i>     | transmembrane p24 trafficking protein 4                      | 224680_at   | 1.232 | 0.004 | 312 | 503  | 1.6 | -1.2 | 1.4  |
| <i>LOXL4</i>     | lysyl oxidase like 4                                         | 227145_at   | 1.231 | 0.004 | 558 | 1187 | 2.1 | 1.0  | 31.0 |
| <i>IFI35</i>     | interferon induced protein 35                                | 209417_s_at | 1.222 | 0.004 | 304 | 469  | 1.5 | 1.9  | 1.6  |
| <i>SGCE</i>      | sarcoglycan epsilon                                          | 204688_at   | 1.221 | 0.004 | 284 | 444  | 1.6 | -1.4 | 1.6  |
| <i>GLT8D1</i>    | glycosyltransferase 8 domain containing 1                    | 218147_s_at | 1.214 | 0.004 | 246 | 409  | 1.7 | 1.2  | -1.2 |
| <i>PLCB4</i>     | phospholipase C beta 4                                       | 203895_at   | 1.209 | 0.004 | 103 | 275  | 2.7 | 2.8  | 1.5  |
| <i>ATP8B2</i>    | ATPase phospholipid transporting 8B2                         | 226771_at   | 1.209 | 0.004 | 514 | 781  | 1.5 | -1.4 | 1.0  |
| <i>TRIM2</i>     | tripartite motif containing 2                                | 202341_s_at | 1.204 | 0.004 | 202 | 309  | 1.5 | -1.3 | -3.7 |
| <i>FAM92A</i>    | family with sequence similarity 92 member A                  | 235391_at   | 1.201 | 0.004 | 142 | 258  | 1.8 | 1.9  | 1.1  |
| <i>IGF2BP2</i>   | insulin like growth factor 2 mRNA binding protein 2          | 218847_at   | 1.200 | 0.004 | 283 | 550  | 1.9 | -1.1 | 1.9  |
| <i>CCN2</i>      | cellular communication network factor 2                      | 209101_at   | 1.191 | 0.004 | 562 | 1054 | 1.9 | 1.8  | 43.5 |
| <i>AKAP12</i>    | A-kinase anchoring protein 12                                | 227530_at   | 1.186 | 0.004 | 255 | 388  | 1.5 | -1.7 | 1.5  |
| <i>RGS3</i>      | regulator of G protein signaling 3                           | 203823_at   | 1.184 | 0.004 | 240 | 395  | 1.6 | -1.1 | 1.3  |

|                    |                                                                                 |              |       |       |      |      |     |      |       |
|--------------------|---------------------------------------------------------------------------------|--------------|-------|-------|------|------|-----|------|-------|
| <i>IER3</i>        | immediate early response 3                                                      | 201631_s_at  | 1.174 | 0.005 | 1279 | 2009 | 1.6 | 2.2  | 12.6  |
| <i>TMEM35B</i>     | transmembrane protein 35B                                                       | 213698_at    | 1.164 | 0.005 | 227  | 350  | 1.5 | 1.3  | 1.8   |
| <i>NTRK3</i>       | neurotrophic receptor tyrosine kinase 3                                         | 215311_at    | 1.161 | 0.005 | 38   | 285  | 7.5 | 3.6  | -1.3  |
| <i>ACOT7</i>       | acyl-CoA thioesterase 7                                                         | 208002_s_at  | 1.159 | 0.005 | 547  | 853  | 1.6 | 1.7  | 2.2   |
| <i>EFR3B</i>       | EFR3 homolog B                                                                  | 227283_at    | 1.158 | 0.005 | 192  | 296  | 1.5 | -1.1 | -1.1  |
| <i>ANLN</i>        | anillin actin binding protein                                                   | 222608_s_at  | 1.151 | 0.005 | 156  | 260  | 1.7 | 3.3  | 26.8  |
| <i>SORL1</i>       | sortilin related receptor 1                                                     | 212560_at    | 1.149 | 0.005 | 352  | 540  | 1.5 | 1.5  | 1.6   |
| <i>TNNC2</i>       | troponin C2, fast skeletal type                                                 | 205388_at    | 1.147 | 0.005 | 175  | 378  | 2.2 | 3.2  | 1.0   |
| <i>MYOC</i>        | myocilin                                                                        | 210155_at    | 1.147 | 0.005 | 152  | 260  | 1.7 | 1.1  | 1.1   |
| <i>SLC25A13</i>    | solute carrier family 25 member 13                                              | 229061_s_at  | 1.146 | 0.005 | 274  | 424  | 1.5 | 2.6  | 1.1   |
| <i>CLEC11A</i>     | C-type lectin domain containing 11A                                             | 211709_s_at  | 1.132 | 0.005 | 246  | 376  | 1.5 | 1.3  | -2.1  |
| <i>CAPN3</i>       | calpain 3                                                                       | 210944_s_at  | 1.129 | 0.005 | 980  | 1477 | 1.5 | -1.1 | -54.6 |
| <i>BAMBI</i>       | BMP and activin membrane bound inhibitor                                        | 203304_at    | 1.123 | 0.005 | 699  | 1255 | 1.8 | -1.2 | 5.0   |
| <i>ALDH1A3</i>     | aldehyde dehydrogenase 1 family member A3                                       | 203180_at    | 1.122 | 0.005 | 586  | 990  | 1.7 | 1.3  | 45.7  |
| <i>PTPRG</i>       | protein tyrosine phosphatase receptor type G                                    | 204944_at    | 1.120 | 0.005 | 172  | 346  | 2.0 | 1.8  | 1.1   |
| <i>NGFR</i>        | nerve growth factor receptor                                                    | 205858_at    | 1.116 | 0.005 | 91   | 218  | 2.4 | 1.5  | 3.4   |
| <i>PRKD1</i>       | protein kinase D1                                                               | 205880_at    | 1.113 | 0.005 | 138  | 285  | 2.1 | -1.1 | -1.1  |
| <i>BIRC5</i>       | baculoviral IAP repeat containing 5                                             | 202095_s_at  | 1.110 | 0.005 | 204  | 327  | 1.6 | 2.3  | 16.8  |
| <i>SHC4</i>        | SHC adaptor protein 4                                                           | 235238_at    | 1.105 | 0.005 | 168  | 333  | 2.0 | 2.0  | -2.0  |
| <i>PLAUR</i>       | plasminogen activator, urokinase receptor                                       | 211924_s_at  | 1.104 | 0.005 | 373  | 571  | 1.5 | 2.4  | 4.5   |
| <i>THBS4</i>       | thrombospondin 4                                                                | 204776_at    | 1.099 | 0.005 | 204  | 420  | 2.1 | 1.5  | 1.0   |
| <i>IGKV1OR2-1C</i> | immunoglobulin kappa variable 1/OR2-108 (non-functional)                        | 217378_x_at  | 1.094 | 0.005 | 323  | 876  | 2.7 | 5.2  | 1.0   |
| <i>LRRN4CL</i>     | LRRN4 C-terminal like                                                           | 1556427_s_at | 1.094 | 0.005 | 476  | 897  | 1.9 | -1.6 | ND    |
| <i>CITED1</i>      | Cbp/p300 interacting transactivator with Glu/Asp rich carboxy-terminal domain 1 | 207144_s_at  | 1.094 | 0.005 | 144  | 260  | 1.8 | 1.6  | -7.4  |
| <i>MCOLN3</i>      | mucolipin 3                                                                     | 242308_at    | 1.089 | 0.005 | 383  | 615  | 1.6 | -1.3 | -1.1  |

|                  |                                                          |              |       |       |      |      |     |      |      |
|------------------|----------------------------------------------------------|--------------|-------|-------|------|------|-----|------|------|
| <i>IGKV1D-13</i> | immunoglobulin kappa variable 1D-13                      | 216207_x_at  | 1.078 | 0.005 | 512  | 1676 | 3.3 | 4.6  | 1.1  |
| <i>ADIPOQ</i>    | adiponectin, C1Q and collagen domain containing          | 207175_at    | 1.070 | 0.005 | 93   | 287  | 3.1 | 4.2  | 1.0  |
| <i>HAGLR</i>     | HOXD antisense growth-associated long non-coding RNA     | 228601_at    | 1.068 | 0.005 | 125  | 228  | 1.8 | 1.7  | 1.5  |
| <i>PTPRM</i>     | protein tyrosine phosphatase receptor type M             | 1555579_s_at | 1.066 | 0.005 | 735  | 1123 | 1.5 | -1.3 | ND   |
| <i>COMP</i>      | cartilage oligomeric matrix protein                      | 205713_s_at  | 1.063 | 0.005 | 310  | 627  | 2.0 | 1.3  | 1.1  |
| <i>BAALC</i>     | BAALC binder of MAP3K1 and KLF4                          | 218899_s_at  | 1.062 | 0.005 | 148  | 568  | 3.8 | 1.7  | 2.0  |
| <i>ISG20</i>     | interferon stimulated exonuclease gene 20                | 204698_at    | 1.048 | 0.005 | 257  | 430  | 1.7 | 3.4  | 1.2  |
| <i>ETV1</i>      | ETS variant 1                                            | 221911_at    | 1.036 | 0.005 | 310  | 532  | 1.7 | -1.7 | 8.8  |
| <i>APOC1</i>     | apolipoprotein C1                                        | 204416_x_at  | 1.023 | 0.005 | 1234 | 1945 | 1.6 | 1.6  | -1.1 |
| <i>FOXD3</i>     | forkhead box D3                                          | 241612_at    | 1.022 | 0.005 | 61   | 224  | 3.7 | 1.4  | 1.2  |
| <i>IGHV1-69</i>  | immunoglobulin heavy variable 1-69                       | 211635_x_at  | 1.019 | 0.005 | 183  | 600  | 3.3 | 2.8  | 1.0  |
| <i>IFNAR2</i>    | interferon alpha and beta receptor subunit 2             | 227125_at    | 1.018 | 0.005 | 181  | 286  | 1.6 | 1.8  | 1.4  |
| <i>DOCK10</i>    | dedicator of cytokinesis 10                              | 219279_at    | 1.017 | 0.005 | 260  | 394  | 1.5 | 1.1  | -1.1 |
| <i>LIMD1</i>     | LIM domains containing 1                                 | 222762_x_at  | 1.016 | 0.005 | 287  | 435  | 1.5 | 1.2  | 1.3  |
| <i>IGKV1-17</i>  | immunoglobulin kappa variable 1-17                       | 211645_x_at  | 1.008 | 0.005 | 211  | 816  | 3.9 | 8.2  | 1.0  |
| <i>RPS11</i>     | ribosomal protein S11                                    | 213350_at    | 1.007 | 0.005 | 639  | 1040 | 1.6 | -4.7 | 1.3  |
| <i>LINC00520</i> | long intergenic non-protein coding RNA 520               | 1555786_s_at | 1.002 | 0.006 | 1092 | 1661 | 1.5 | 2.3  | ND   |
| <i>AP3D1</i>     | adaptor related protein complex 3 subunit delta 1        | 208710_s_at  | 0.994 | 0.006 | 389  | 822  | 2.1 | 1.5  | -2.1 |
| <i>GJC1</i>      | gap junction protein gamma 1                             | 228776_at    | 0.971 | 0.006 | 240  | 365  | 1.5 | -1.6 | 2.8  |
| <i>KAT2B</i>     | lysine acetyltransferase 2B                              | 203845_at    | 0.965 | 0.006 | 474  | 819  | 1.7 | -1.2 | -3.1 |
| <i>MMP9</i>      | matrix metalloproteinase 9                               | 203936_s_at  | 0.959 | 0.006 | 746  | 1477 | 2.0 | 5.2  | 1.6  |
| <i>KCNN4</i>     | potassium calcium-activated channel subfamily N member 4 | 204401_at    | 0.957 | 0.006 | 320  | 585  | 1.8 | 1.5  | 5.4  |
| <i>NEDD4L</i>    | NEDD4 like E3 ubiquitin protein ligase                   | 241396_at    | 0.954 | 0.006 | 104  | 224  | 2.2 | 2.7  | -2.2 |

|                 |                                                        |             |       |       |     |      |     |      |      |
|-----------------|--------------------------------------------------------|-------------|-------|-------|-----|------|-----|------|------|
| <i>HES1</i>     | hes family bHLH transcription factor 1                 | 203394_s_at | 0.939 | 0.006 | 360 | 621  | 1.7 | -1.1 | 1.8  |
| <i>PLIN1</i>    | perilipin 1                                            | 205913_at   | 0.934 | 0.006 | 227 | 415  | 1.8 | 1.8  | 1.1  |
| <i>CTSZ</i>     | cathepsin Z                                            | 210042_s_at | 0.925 | 0.006 | 364 | 916  | 2.5 | 2.7  | -2.8 |
| <i>CRTAC1</i>   | cartilage acidic protein 1                             | 221204_s_at | 0.922 | 0.006 | 230 | 389  | 1.7 | -5.6 | -1.2 |
| <i>C5AR1</i>    | complement C5a receptor 1                              | 220088_at   | 0.922 | 0.006 | 265 | 462  | 1.7 | 5.9  | 1.0  |
| <i>GREM1</i>    | gremlin 1, DAN family BMP antagonist                   | 218468_s_at | 0.908 | 0.006 | 134 | 277  | 2.1 | 1.9  | 1.0  |
| <i>RARRES2</i>  | retinoic acid receptor responder 2                     | 209496_at   | 0.901 | 0.007 | 292 | 447  | 1.5 | 1.7  | -1.1 |
| <i>FAH</i>      | fumarylacetoacetate hydrolase                          | 202862_at   | 0.887 | 0.007 | 246 | 372  | 1.5 | 2.1  | 1.2  |
| <i>TENT5C</i>   | terminal nucleotidyltransferase 5C                     | 226811_at   | 0.884 | 0.007 | 163 | 323  | 2.0 | 1.3  | 2.8  |
| <i>DDX3Y</i>    | DEAD-box helicase 3 Y-linked                           | 205001_s_at | 0.882 | 0.007 | 114 | 227  | 2.0 | 1.5  | -1.1 |
| <i>POU2AF1</i>  | POU class 2 homeobox associating factor 1              | 205267_at   | 0.873 | 0.007 | 59  | 169  | 2.9 | 2.8  | 1.0  |
| <i>NTM</i>      | neurotrimin                                            | 227566_at   | 0.869 | 0.007 | 179 | 365  | 2.0 | -1.1 | 16.1 |
| <i>ASAP1</i>    | ArfGAP with SH3 domain, ankyrin repeat and PH domain 1 | 236533_at   | 0.850 | 0.007 | 157 | 264  | 1.7 | 1.3  | -1.1 |
| <i>IGLV3-10</i> | immunoglobulin lambda variable 3-10                    | 216560_x_at | 0.846 | 0.007 | 153 | 347  | 2.3 | 2.4  | 1.3  |
| <i>FNDC1</i>    | fibronectin type III domain containing 1               | 226930_at   | 0.845 | 0.007 | 110 | 229  | 2.1 | 1.6  | 1.1  |
| <i>CEMIP</i>    | cell migration inducing hyaluronidase 1                | 212942_s_at | 0.844 | 0.007 | 363 | 627  | 1.7 | 4.1  | 1.5  |
| <i>TMEM119</i>  | transmembrane protein 119                              | 227300_at   | 0.825 | 0.007 | 207 | 314  | 1.5 | 1.5  | -1.2 |
| <i>RGS1</i>     | regulator of G protein signaling 1                     | 216834_at   | 0.824 | 0.007 | 869 | 1458 | 1.7 | 24.3 | 1.2  |
| <i>SRSF6</i>    | serine and arginine rich splicing factor 6             | 206108_s_at | 0.791 | 0.008 | 169 | 273  | 1.6 | -1.1 | -1.5 |
| <i>LAMB1</i>    | laminin subunit beta 1                                 | 201505_at   | 0.789 | 0.008 | 486 | 740  | 1.5 | 2.1  | 3.0  |
| <i>IGHG1</i>    | immunoglobulin heavy constant gamma 1 (G1m marker)     | 211633_x_at | 0.788 | 0.008 | 176 | 374  | 2.1 | 2.2  | -1.1 |
| <i>LRRC8C</i>   | leucine rich repeat containing 8 VRAC subunit C        | 223533_at   | 0.773 | 0.008 | 210 | 320  | 1.5 | 1.0  | 1.2  |
| <i>CADM1</i>    | cell adhesion molecule 1                               | 209032_s_at | 0.771 | 0.008 | 152 | 325  | 2.1 | -1.8 | 1.5  |

|                 |                                                   |              |       |       |      |      |     |      |       |
|-----------------|---------------------------------------------------|--------------|-------|-------|------|------|-----|------|-------|
| <i>HSPA12A</i>  | heat shock protein family A (Hsp70)<br>member 12A | 214434_at    | 0.755 | 0.008 | 205  | 369  | 1.8 | -2.6 | -1.4  |
| <i>IFI6</i>     | interferon alpha inducible protein 6              | 204415_at    | 0.729 | 0.008 | 628  | 1310 | 2.1 | 2.4  | -16.9 |
| <i>G0S2</i>     | G0/G1 switch 2                                    | 213524_s_at  | 0.723 | 0.008 | 453  | 709  | 1.6 | 7.1  | 1.1   |
| <i>CAPG</i>     | capping actin protein, gelsolin like              | 201850_at    | 0.706 | 0.008 | 1031 | 1561 | 1.5 | 2.5  | -19.2 |
| <i>JCHAIN</i>   | joining chain of multimeric IgA and IgM           | 212592_at    | 0.676 | 0.009 | 153  | 333  | 2.2 | 7.6  | 1.0   |
| <i>JAK1</i>     | Janus kinase 1                                    | 1552611_a_at | 0.608 | 0.009 | 220  | 332  | 1.5 | -1.4 | ND    |
| <i>ADAMDEC1</i> | ADAM like decysin 1                               | 206134_at    | 0.573 | 0.010 | 383  | 769  | 2.0 | 11.8 | 1.1   |

---

Only probesets with unique annotations are shown.

ND, not determined
