# Supplementary material for: Prolyl 4‐hydroxylase subunit alpha 1 (P4HA1) is a biomarker of poor prognosis in primary melanomas, and its depletion inhibits melanoma cell invasion and disrupts tumor blood vessel walls
Source: PubMed Central journal article supplement (PMC7138405; doi:10.1002/1878-0261.12649), 2020-02-28
Supplement: MOL2-14-742-s018.pdf [file MOL2-14-742-s018.pdf]

Table S3. Significance Analysis of Microarrays (SAM) results of mRNA expression levels in primary melanomas associated most significantly with patient survival (lower expression in cases with short survival).

| Gene           | Gene description                             | Gene ID     | SAM score | False discovery rate q-value | Mean expression |      | Fold Dead vs alive | Fold Primary melanomas vs benign nevi | Fold Melanoma cells vs melanocytes |
|----------------|----------------------------------------------|-------------|-----------|------------------------------|-----------------|------|--------------------|---------------------------------------|------------------------------------|
|                |                                              |             |           |                              | Alive           | Dead |                    |                                       |                                    |
| <i>KRT10</i>   | keratin 10                                   | 210633_x_at | -3.327    | 0.001                        | 10758           | 6829 | -1.6               | -1.2                                  | 1.2                                |
| <i>NCOA4</i>   | nuclear receptor coactivator 4               | 210774_s_at | -3.090    | 0.001                        | 3899            | 2582 | -1.5               | -1.0                                  | -2.8                               |
| <i>SCP2</i>    | sterol carrier protein 2                     | 211733_x_at | -3.085    | 0.001                        | 2263            | 1370 | -1.7               | 1.2                                   | -3.4                               |
| <i>FOXN3</i>   | forkhead box N3                              | 222494_at   | -3.061    | 0.001                        | 870             | 495  | -1.8               | -1.8                                  | -2.3                               |
| <i>MTSS1</i>   | MTSS I-BAR domain containing 1               | 203037_s_at | -3.058    | 0.001                        | 1394            | 793  | -1.8               | -1.1                                  | -4.6                               |
| <i>ANXA4</i>   | annexin A4                                   | 201302_at   | -2.884    | 0.001                        | 1261            | 741  | -1.7               | -1.3                                  | -5.9                               |
| <i>REEP5</i>   | receptor accessory protein 5                 | 208873_s_at | -2.870    | 0.001                        | 971             | 499  | -1.9               | -1.1                                  | -1.9                               |
| <i>FBXL3</i>   | F-box and leucine rich repeat protein 3      | 225132_at   | -2.812    | 0.001                        | 1402            | 828  | -1.7               | -1.2                                  | -1.0                               |
| <i>CAST</i>    | calpastatin                                  | 212586_at   | -2.804    | 0.001                        | 2175            | 1276 | -1.7               | -1.3                                  | -3.2                               |
| <i>CCDC6</i>   | coiled-coil domain containing 6              | 225010_at   | -2.794    | 0.001                        | 1042            | 574  | -1.8               | -1.2                                  | 1.0                                |
| <i>RAB18</i>   | RAB18, member RAS oncogene family            | 224787_s_at | -2.779    | 0.001                        | 1174            | 628  | -1.9               | 1.2                                   | -2.0                               |
| <i>DMKN</i>    | dermokine                                    | 226926_at   | -2.778    | 0.001                        | 4644            | 1525 | -3.0               | -1.9                                  | -1.2                               |
| <i>SLC38A2</i> | solute carrier family 38 member 2            | 222982_x_at | -2.758    | 0.001                        | 3170            | 1877 | -1.7               | -1.3                                  | -1.2                               |
| <i>SHOC2</i>   | SHOC2 leucine rich repeat scaffold protein   | 202777_at   | -2.754    | 0.001                        | 581             | 340  | -1.7               | 1.1                                   | -1.7                               |
| <i>PNRC2</i>   | proline rich nuclear receptor coactivator 2  | 217779_s_at | -2.736    | 0.001                        | 1307            | 853  | -1.5               | 1.1                                   | 1.0                                |
| <i>HIPK3</i>   | homeodomain interacting protein kinase 3     | 226297_at   | -2.736    | 0.001                        | 1930            | 1038 | -1.9               | 1.0                                   | -1.0                               |
| <i>EGFR</i>    | epidermal growth factor receptor             | 201983_s_at | -2.710    | 0.001                        | 1503            | 475  | -3.2               | -2.0                                  | 1.4                                |
| <i>RAP2A</i>   | RAP2A, member of RAS oncogene family         | 225585_at   | -2.701    | 0.001                        | 845             | 434  | -1.9               | 1.4                                   | -3.4                               |
| <i>FAM126A</i> | family with sequence similarity 126 member A | 227239_at   | -2.690    | 0.001                        | 1102            | 481  | -2.3               | 1.7                                   | 1.2                                |
| <i>TUFT1</i>   | tuftelin 1                                   | 205807_s_at | -2.680    | 0.001                        | 953             | 376  | -2.5               | -1.5                                  | -5.5                               |
| <i>DSC3</i>    | desmocollin 3                                | 206033_s_at | -2.665    | 0.001                        | 2461            | 543  | -4.5               | -1.8                                  | 1.0                                |
| <i>PERP</i>    | p53 apoptosis effector related to PMP22      | 222392_x_at | -2.661    | 0.001                        | 8938            | 5018 | -1.8               | -1.3                                  | 2.4                                |

|                 |                                                 |             |        |       |       |      |      |      |        |
|-----------------|-------------------------------------------------|-------------|--------|-------|-------|------|------|------|--------|
| <i>SNHG5</i>    | small nucleolar RNA host gene 5                 | 225155_at   | -2.660 | 0.001 | 3572  | 1767 | -2.0 | -1.4 | 2.4    |
| <i>HOPX</i>     | HOP homeobox                                    | 211597_s_at | -2.649 | 0.001 | 5113  | 1635 | -3.1 | -1.8 | -1.1   |
| <i>GSTA4</i>    | glutathione S-transferase alpha 4               | 202967_at   | -2.649 | 0.001 | 1543  | 699  | -2.2 | -1.5 | -5.3   |
| <i>TM9SF3</i>   | transmembrane 9 superfamily member 3            | 224755_at   | -2.647 | 0.001 | 753   | 393  | -1.9 | -1.4 | 1.1    |
| <i>SLC30A1</i>  | solute carrier family 30 member 1               | 212907_at   | -2.643 | 0.001 | 1675  | 703  | -2.4 | 1.6  | 2.0    |
| <i>CLDN1</i>    | claudin 1                                       | 222549_at   | -2.643 | 0.001 | 1713  | 337  | -5.1 | -2.1 | 1.5    |
| <i>PTBP3</i>    | polypyrimidine tract binding protein 3          | 224617_at   | -2.640 | 0.001 | 1759  | 996  | -1.8 | 1.0  | 1.5    |
| <i>CMPK1</i>    | cytidine/uridine monophosphate kinase 1         | 217870_s_at | -2.637 | 0.001 | 1488  | 769  | -1.9 | 1.1  | 1.1    |
| <i>NR3C1</i>    | nuclear receptor subfamily 3 group C member 1   | 216321_s_at | -2.632 | 0.001 | 844   | 508  | -1.7 | -1.5 | -1.7   |
| <i>RIOK3</i>    | RIO kinase 3                                    | 202130_at   | -2.628 | 0.001 | 1205  | 674  | -1.8 | 1.3  | 1.7    |
| <i>C11orf58</i> | chromosome 11 open reading frame 58             | 225811_at   | -2.619 | 0.001 | 569   | 339  | -1.7 | -1.6 | -1.2   |
| <i>CXADR</i>    | CXADR Ig-like cell adhesion molecule            | 203917_at   | -2.606 | 0.001 | 1950  | 548  | -3.6 | -1.2 | -1.1   |
| <i>SPIN1</i>    | spindlin 1                                      | 222431_at   | -2.606 | 0.001 | 999   | 645  | -1.5 | -1.2 | 1.0    |
| <i>KRTDAP</i>   | keratinocyte differentiation associated protein | 230835_at   | -2.605 | 0.001 | 11301 | 5671 | -2.0 | -1.3 | -1.0   |
| <i>ASPRV1</i>   | aspartic peptidase retroviral like 1            | 235514_at   | -2.586 | 0.001 | 5419  | 2056 | -2.6 | -1.1 | -1.1   |
| <i>SLK</i>      | STE20 like kinase                               | 206874_s_at | -2.577 | 0.001 | 545   | 276  | -2.0 | -1.2 | -2.6   |
| <i>KRT5</i>     | keratin 5                                       | 201820_at   | -2.574 | 0.001 | 9290  | 4739 | -2.0 | -1.6 | 1.3    |
| <i>TACSTD2</i>  | tumor associated calcium signal transducer 2    | 202286_s_at | -2.572 | 0.001 | 5283  | 1898 | -2.8 | -1.5 | -1.1   |
| <i>CERS6</i>    | ceramide synthase 6                             | 212442_s_at | -2.571 | 0.001 | 786   | 461  | -1.7 | -1.5 | 1.9    |
| <i>DDX3X</i>    | DEAD-box helicase 3 X-linked                    | 212515_s_at | -2.559 | 0.001 | 1064  | 633  | -1.7 | 1.0  | 1.1    |
| <i>TOB1</i>     | transducer of ERBB2, 1                          | 202704_at   | -2.556 | 0.001 | 1330  | 659  | -2.0 | -1.0 | -2.6   |
| <i>TYRP1</i>    | tyrosinase related protein 1                    | 205694_at   | -2.552 | 0.001 | 8111  | 3204 | -2.5 | -1.4 | -267.4 |
| <i>RNF141</i>   | ring finger protein 141                         | 226106_at   | -2.545 | 0.001 | 984   | 418  | -2.4 | -1.3 | -1.9   |
| <i>TMEM106B</i> | transmembrane protein 106B                      | 226529_at   | -2.537 | 0.001 | 1159  | 546  | -2.1 | 1.1  | -1.3   |
| <i>TP63</i>     | tumor protein p63                               | 209863_s_at | -2.528 | 0.001 | 1485  | 413  | -3.6 | -2.0 | 1.3    |
| <i>PDCD4</i>    | programmed cell death 4                         | 212593_s_at | -2.524 | 0.001 | 1865  | 1085 | -1.7 | -1.4 | -1.5   |
| <i>KRT1</i>     | keratin 1                                       | 205900_at   | -2.521 | 0.001 | 13309 | 7534 | -1.8 | -1.4 | 1.2    |
| <i>CCNG2</i>    | cyclin G2                                       | 202769_at   | -2.521 | 0.001 | 627   | 345  | -1.8 | -1.1 | -3.0   |
| <i>AK3</i>      | adenylate kinase 3                              | 224655_at   | -2.506 | 0.001 | 1842  | 1039 | -1.8 | 1.1  | -2.8   |

|                |                                                    |             |        |       |      |      |      |      |      |
|----------------|----------------------------------------------------|-------------|--------|-------|------|------|------|------|------|
| <i>TMEM45A</i> | transmembrane protein 45A                          | 219410_at   | -2.502 | 0.001 | 7233 | 3294 | -2.2 | -1.1 | 5.5  |
| <i>CD44</i>    | CD44 molecule (Indian blood group)                 | 217523_at   | -2.498 | 0.001 | 999  | 364  | -2.7 | 1.5  | 1.2  |
| <i>FCHO2</i>   | FCH domain only 2                                  | 228220_at   | -2.494 | 0.001 | 660  | 313  | -2.1 | 1.4  | -1.5 |
| <i>KMT5B</i>   | lysine methyltransferase 5B                        | 218242_s_at | -2.488 | 0.001 | 763  | 458  | -1.7 | 1.0  | -2.1 |
| <i>LCE1B</i>   | late cornified envelope 1B                         | 1560531_at  | -2.477 | 0.001 | 3484 | 1080 | -3.2 | -1.5 | ND   |
| <i>OTUD1</i>   | OTU deubiquitinase 1                               | 226140_s_at | -2.476 | 0.001 | 558  | 354  | -1.6 | -1.7 | -4.3 |
| <i>GNAI1</i>   | G protein subunit alpha i1                         | 227692_at   | -2.476 | 0.001 | 745  | 234  | -3.2 | -1.4 | 1.0  |
| <i>LOR</i>     | loricrin                                           | 207720_at   | -2.470 | 0.001 | 9162 | 3873 | -2.4 | -1.7 | 1.0  |
| <i>ALDH2</i>   | aldehyde dehydrogenase 2 family member             | 201425_at   | -2.464 | 0.001 | 2165 | 890  | -2.4 | -1.4 | -1.2 |
| <i>YBX3</i>    | Y-box binding protein 3                            | 201161_s_at | -2.463 | 0.001 | 2666 | 1525 | -1.7 | -1.5 | 2.1  |
| <i>FLG2</i>    | filaggrin family member 2                          | 1569410_at  | -2.463 | 0.001 | 5599 | 1736 | -3.2 | -1.6 | ND   |
| <i>FLG</i>     | filaggrin                                          | 215704_at   | -2.461 | 0.001 | 5199 | 2438 | -2.1 | -1.2 | 1.0  |
| <i>TXNIP</i>   | thioredoxin interacting protein                    | 201010_s_at | -2.461 | 0.001 | 4016 | 2639 | -1.5 | -1.6 | -4.8 |
| <i>SEMA3C</i>  | semaphorin 3C                                      | 203789_s_at | -2.460 | 0.001 | 1491 | 713  | -2.1 | -1.3 | -3.2 |
| <i>GJA1</i>    | gap junction protein alpha 1                       | 201667_at   | -2.456 | 0.001 | 6420 | 3075 | -2.1 | -1.1 | -1.0 |
| <i>CMTM6</i>   | CKLF like MARVEL transmembrane domain containing 6 | 217947_at   | -2.454 | 0.001 | 3109 | 2063 | -1.5 | 1.2  | 2.3  |
| <i>DSP</i>     | desmoplakin                                        | 200606_at   | -2.450 | 0.001 | 7193 | 4008 | -1.8 | -1.5 | 1.1  |
| <i>GCLC</i>    | glutamate-cysteine ligase catalytic subunit        | 202923_s_at | -2.449 | 0.001 | 634  | 340  | -1.9 | 1.1  | -1.6 |
| <i>KRAS</i>    | KRAS proto-oncogene, GTPase                        | 204009_s_at | -2.446 | 0.001 | 841  | 544  | -1.5 | 1.2  | -1.4 |
| <i>RORA</i>    | RAR related orphan receptor A                      | 226682_at   | -2.443 | 0.001 | 1174 | 281  | -4.2 | -1.7 | -1.1 |
| <i>ABI1</i>    | abl interactor 1                                   | 209028_s_at | -2.438 | 0.001 | 692  | 400  | -1.7 | -1.2 | -2.2 |
| <i>TRIM29</i>  | tripartite motif containing 29                     | 202504_at   | -2.424 | 0.001 | 4915 | 1817 | -2.7 | -1.8 | 1.1  |
| <i>FOSL2</i>   | FOS like 2, AP-1 transcription factor subunit      | 228188_at   | -2.423 | 0.001 | 582  | 297  | -2.0 | -1.2 | -1.2 |
| <i>HECA</i>    | hdc homolog, cell cycle regulator                  | 218603_at   | -2.419 | 0.001 | 919  | 530  | -1.7 | -1.2 | -2.3 |
| <i>CHIC2</i>   | cysteine rich hydrophobic domain 2                 | 219492_at   | -2.418 | 0.001 | 692  | 378  | -1.8 | 1.1  | -1.3 |
| <i>KLF10</i>   | Kruppel like factor 10                             | 202393_s_at | -2.414 | 0.001 | 1304 | 806  | -1.6 | -1.3 | 2.3  |
| <i>PGRMC2</i>  | progesterone receptor membrane component 2         | 213227_at   | -2.412 | 0.001 | 828  | 408  | -2.0 | -1.7 | -3.2 |
| <i>DIPK2A</i>  | divergent protein kinase domain 2A                 | 226464_at   | -2.409 | 0.001 | 693  | 307  | -2.3 | -1.1 | 1.2  |

|                 |                                                           |             |        |       |      |      |      |      |       |
|-----------------|-----------------------------------------------------------|-------------|--------|-------|------|------|------|------|-------|
| <i>FAM8A1</i>   | family with sequence similarity 8 member A1               | 203420_at   | -2.404 | 0.001 | 798  | 466  | -1.7 | -1.0 | -1.5  |
| <i>OSBPL8</i>   | oxysterol binding protein like 8                          | 212585_at   | -2.400 | 0.001 | 992  | 469  | -2.1 | 1.3  | -1.2  |
| <i>EIF1AX</i>   | eukaryotic translation initiation factor 1A X-linked      | 201018_at   | -2.397 | 0.001 | 583  | 304  | -1.9 | -1.2 | -1.2  |
| <i>ABLIM1</i>   | actin binding LIM protein 1                               | 200965_s_at | -2.390 | 0.001 | 2014 | 742  | -2.7 | -1.6 | 1.3   |
| <i>FBXO9</i>    | F-box protein 9                                           | 212987_at   | -2.376 | 0.001 | 1285 | 827  | -1.6 | 1.0  | -3.0  |
| <i>AHNAK2</i>   | AHNAK nucleoprotein 2                                     | 212992_at   | -2.376 | 0.001 | 1369 | 493  | -2.8 | -2.9 | -1.5  |
| <i>VPS4B</i>    | vacuolar protein sorting 4 homolog B                      | 218171_at   | -2.372 | 0.001 | 879  | 512  | -1.7 | -1.0 | -1.1  |
| <i>RNF11</i>    | ring finger protein 11                                    | 208924_at   | -2.372 | 0.001 | 1248 | 730  | -1.7 | 1.1  | -1.2  |
| <i>BORCS7</i>   | BLOC-1 related complex subunit 7                          | 225334_at   | -2.370 | 0.001 | 760  | 407  | -1.9 | 1.1  | -7.3  |
| <i>SLC25A46</i> | solute carrier family 25 member 46                        | 226831_at   | -2.368 | 0.001 | 470  | 216  | -2.2 | 1.4  | -2.3  |
| <i>OPTN</i>     | optineurin                                                | 202073_at   | -2.361 | 0.001 | 508  | 309  | -1.6 | -1.2 | -11.5 |
| <i>UBE2K</i>    | ubiquitin conjugating enzyme E2 K                         | 225179_at   | -2.359 | 0.001 | 839  | 466  | -1.8 | -1.1 | 1.4   |
| <i>ALDH3A2</i>  | aldehyde dehydrogenase 3 family member A2                 | 202054_s_at | -2.357 | 0.001 | 1043 | 454  | -2.3 | -2.3 | -1.1  |
| <i>IMPA2</i>    | inositol monophosphatase 2                                | 203126_at   | -2.357 | 0.001 | 1390 | 492  | -2.8 | -1.3 | -2.4  |
| <i>SETD7</i>    | SET domain containing 7, histone lysine methyltransferase | 224928_at   | -2.349 | 0.001 | 836  | 517  | -1.6 | -1.1 | -1.1  |
| <i>KLF3</i>     | Kruppel like factor 3                                     | 225133_at   | -2.347 | 0.001 | 1100 | 535  | -2.1 | -1.3 | -1.8  |
| <i>CXCL14</i>   | C-X-C motif chemokine ligand 14                           | 218002_s_at | -2.338 | 0.001 | 3655 | 1715 | -2.1 | -1.9 | 3.0   |
| <i>RNF144B</i>  | ring finger protein 144B                                  | 228153_at   | -2.334 | 0.001 | 862  | 386  | -2.2 | 1.1  | -2.3  |
| <i>SPINK5</i>   | serine peptidase inhibitor, Kazal type 5                  | 205185_at   | -2.328 | 0.001 | 4916 | 1419 | -3.5 | 1.0  | -1.3  |
| <i>KLK5</i>     | kallikrein related peptidase 5                            | 222242_s_at | -2.327 | 0.001 | 1826 | 607  | -3.0 | -1.3 | -1.0  |
| <i>ZBTB33</i>   | zinc finger and BTB domain containing 33                  | 226255_at   | -2.325 | 0.001 | 801  | 519  | -1.5 | -1.1 | -1.8  |
| <i>TXNDC9</i>   | thioredoxin domain containing 9                           | 211758_x_at | -2.319 | 0.001 | 823  | 523  | -1.6 | 1.6  | 1.5   |
| <i>CAMK1D</i>   | calcium/calmodulin dependent protein kinase ID            | 235626_at   | -2.311 | 0.001 | 580  | 248  | -2.3 | -1.3 | -1.2  |
| <i>PPL</i>      | periplakin                                                | 203407_at   | -2.309 | 0.001 | 1443 | 550  | -2.6 | -1.5 | -1.2  |
| <i>DENND4C</i>  | DENN domain containing 4C                                 | 226867_at   | -2.304 | 0.001 | 779  | 417  | -1.9 | -1.3 | -1.7  |
| <i>RAD23B</i>   | RAD23 homolog B, nucleotide excision repair protein       | 223598_at   | -2.304 | 0.001 | 657  | 383  | -1.7 | -1.2 | -1.0  |
| <i>ERBB2</i>    | erb-b2 receptor tyrosine kinase 2                         | 216836_s_at | -2.302 | 0.001 | 815  | 444  | -1.8 | -1.5 | 1.6   |

|                  |                                                                        |             |        |       |      |      |      |      |      |
|------------------|------------------------------------------------------------------------|-------------|--------|-------|------|------|------|------|------|
| <i>LCE2B</i>     | late cornified envelope 2B                                             | 207710_at   | -2.300 | 0.001 | 1970 | 606  | -3.2 | -1.9 | -1.0 |
| <i>RBPJ</i>      | recombination signal binding protein for immunoglobulin kappa J region | 207785_s_at | -2.294 | 0.001 | 794  | 517  | -1.5 | -1.1 | -1.4 |
| <i>UBE2E2</i>    | ubiquitin conjugating enzyme E2 E2                                     | 225651_at   | -2.294 | 0.001 | 613  | 353  | -1.7 | -1.0 | 2.3  |
| <i>JMY</i>       | junction mediating and regulatory protein, p53 cofactor                | 226352_at   | -2.294 | 0.001 | 599  | 238  | -2.5 | 1.2  | -1.7 |
| <i>NFIB</i>      | nuclear factor I B                                                     | 213029_at   | -2.282 | 0.001 | 704  | 319  | -2.2 | -1.9 | -1.4 |
| <i>CLCA2</i>     | chloride channel accessory 2                                           | 206165_s_at | -2.281 | 0.001 | 2739 | 1044 | -2.6 | 1.1  | -1.0 |
| <i>TMEM123</i>   | transmembrane protein 123                                              | 211967_at   | -2.270 | 0.001 | 1922 | 1034 | -1.9 | 1.2  | 1.6  |
| <i>KIF5B</i>     | kinesin family member 5B                                               | 224662_at   | -2.268 | 0.001 | 1497 | 839  | -1.8 | 1.5  | 1.8  |
| <i>DST</i>       | dystonin                                                               | 204455_at   | -2.266 | 0.001 | 1217 | 311  | -3.9 | -1.6 | 1.1  |
| <i>NIPSNAP3A</i> | nipsnap homolog 3A                                                     | 224436_s_at | -2.264 | 0.001 | 519  | 238  | -2.2 | 1.2  | -2.8 |
| <i>OGFRL1</i>    | opioid growth factor receptor like 1                                   | 226810_at   | -2.260 | 0.001 | 765  | 339  | -2.3 | 1.2  | 1.1  |
| <i>GATA3</i>     | GATA binding protein 3                                                 | 209604_s_at | -2.256 | 0.001 | 1610 | 395  | -4.1 | -3.2 | 1.1  |
| <i>PANK3</i>     | pantothenate kinase 3                                                  | 221751_at   | -2.253 | 0.001 | 939  | 470  | -2.0 | 1.1  | 1.2  |
| <i>NDFIP2</i>    | Nedd4 family interacting protein 2                                     | 224802_at   | -2.253 | 0.001 | 851  | 367  | -2.3 | -1.5 | 3.4  |
| <i>SBSN</i>      | suprabasin                                                             | 235272_at   | -2.252 | 0.001 | 4194 | 1647 | -2.5 | -1.5 | 1.1  |
| <i>ARL5A</i>     | ADP ribosylation factor like GTPase 5A                                 | 218150_at   | -2.252 | 0.001 | 1824 | 946  | -1.9 | 1.4  | -1.3 |
| <i>UBQLN1</i>    | ubiquilin 1                                                            | 222990_at   | -2.249 | 0.001 | 1620 | 1079 | -1.5 | 1.1  | -1.3 |
| <i>STK38L</i>    | serine/threonine kinase 38 like                                        | 212572_at   | -2.249 | 0.001 | 509  | 276  | -1.8 | 1.5  | -1.4 |
| <i>MOB4</i>      | MOB family member 4, phocein                                           | 202919_at   | -2.247 | 0.001 | 682  | 434  | -1.6 | 1.3  | -1.1 |
| <i>VPS36</i>     | vacuolar protein sorting 36 homolog                                    | 222478_at   | -2.247 | 0.001 | 700  | 369  | -1.9 | -1.2 | -1.8 |
| <i>KLF4</i>      | Kruppel like factor 4                                                  | 221841_s_at | -2.246 | 0.001 | 3075 | 1547 | -2.0 | -1.4 | 1.4  |
| <i>GJB3</i>      | gap junction protein beta 3                                            | 205490_x_at | -2.244 | 0.001 | 728  | 302  | -2.4 | -1.5 | -1.1 |
| <i>SH3YL1</i>    | SH3 and SYLF domain containing 1                                       | 204019_s_at | -2.244 | 0.001 | 879  | 417  | -2.1 | -1.4 | -2.4 |
| <i>CPEB4</i>     | cytoplasmic polyadenylation element binding protein 4                  | 224828_at   | -2.242 | 0.001 | 489  | 157  | -3.1 | 1.4  | -1.4 |
| <i>IRX2</i>      | iroquois homeobox 2                                                    | 228462_at   | -2.242 | 0.001 | 499  | 210  | -2.4 | -1.2 | -2.8 |
| <i>GSKIP</i>     | GSK3B interacting protein                                              | 223239_at   | -2.239 | 0.001 | 711  | 417  | -1.7 | 1.7  | -1.2 |
| <i>SCAF11</i>    | SR-related CTD associated factor 11                                    | 206989_s_at | -2.236 | 0.001 | 942  | 600  | -1.6 | 1.3  | -1.8 |
| <i>BNIP3L</i>    | BCL2 interacting protein 3 like                                        | 221478_at   | -2.230 | 0.001 | 1568 | 1001 | -1.6 | 1.2  | -2.9 |
| <i>NOTCH2NLA</i> | notch 2 N-terminal like A                                              | 214722_at   | -2.229 | 0.001 | 1967 | 1230 | -1.6 | 1.5  | -1.2 |
| <i>IDE</i>       | insulin degrading enzyme                                               | 203327_at   | -2.225 | 0.001 | 1304 | 472  | -2.8 | -1.1 | 1.1  |

|                |                                                   |             |        |       |      |      |      |      |      |
|----------------|---------------------------------------------------|-------------|--------|-------|------|------|------|------|------|
| <i>DEGS1</i>   | delta 4-desaturase, sphingolipid 1                | 207431_s_at | -2.224 | 0.001 | 2263 | 1086 | -2.1 | -2.0 | 1.7  |
| <i>NET1</i>    | neuroepithelial cell transforming 1               | 201830_s_at | -2.220 | 0.001 | 906  | 381  | -2.4 | -1.4 | 3.0  |
| <i>LY6D</i>    | lymphocyte antigen 6 family member D              | 206276_at   | -2.219 | 0.001 | 1575 | 544  | -2.9 | -1.6 | -1.1 |
| <i>ARRDC4</i>  | arrestin domain containing 4                      | 225283_at   | -2.215 | 0.001 | 697  | 381  | -1.8 | -1.2 | -7.7 |
| <i>CA12</i>    | carbonic anhydrase 12                             | 203963_at   | -2.212 | 0.001 | 1465 | 593  | -2.5 | -1.6 | 1.9  |
| <i>BCL11A</i>  | BAF chromatin remodeling complex subunit BCL11A   | 222891_s_at | -2.210 | 0.001 | 635  | 152  | -4.2 | -1.5 | -1.3 |
| <i>KLK11</i>   | kallikrein related peptidase 11                   | 205470_s_at | -2.204 | 0.001 | 874  | 348  | -2.5 | -1.6 | -1.1 |
| <i>HSPB8</i>   | heat shock protein family B (small) member 8      | 221667_s_at | -2.194 | 0.001 | 986  | 466  | -2.1 | -1.0 | -3.0 |
| <i>KLHL9</i>   | kelch like family member 9                        | 213233_s_at | -2.190 | 0.001 | 730  | 458  | -1.6 | -1.3 | -1.9 |
| <i>PLEKHA1</i> | pleckstrin homology domain containing A1          | 226247_at   | -2.189 | 0.001 | 763  | 346  | -2.2 | -1.3 | -1.3 |
| <i>FGFR3</i>   | fibroblast growth factor receptor 3               | 204379_s_at | -2.189 | 0.001 | 1189 | 311  | -3.8 | -2.7 | -1.0 |
| <i>BPIFC</i>   | BPI fold containing family C                      | 1555773_at  | -2.185 | 0.001 | 889  | 305  | -2.9 | -1.1 | ND   |
| <i>INAVA</i>   | innate immunity activator                         | 219010_at   | -2.184 | 0.001 | 833  | 302  | -2.8 | -1.5 | 1.8  |
| <i>F11R</i>    | F11 receptor                                      | 223000_s_at | -2.182 | 0.001 | 1335 | 770  | -1.7 | -1.1 | -1.2 |
| <i>KRT80</i>   | keratin 80                                        | 231849_at   | -2.181 | 0.001 | 968  | 294  | -3.3 | -1.3 | 1.0  |
| <i>PLAGL1</i>  | PLAG1 like zinc finger 1                          | 209318_x_at | -2.179 | 0.001 | 826  | 405  | -2.0 | -1.3 | 1.4  |
| <i>IL6ST</i>   | interleukin 6 signal transducer                   | 212195_at   | -2.176 | 0.001 | 1766 | 1113 | -1.6 | 1.3  | 2.7  |
| <i>EEA1</i>    | early endosome antigen 1                          | 225885_at   | -2.176 | 0.001 | 557  | 257  | -2.2 | 1.3  | 1.2  |
| <i>PLXDC2</i>  | plexin domain containing 2                        | 226865_at   | -2.175 | 0.001 | 642  | 332  | -1.9 | -1.1 | -1.4 |
| <i>EMP2</i>    | epithelial membrane protein 2                     | 225078_at   | -2.173 | 0.001 | 1280 | 545  | -2.3 | -1.7 | 3.6  |
| <i>BCL6</i>    | BCL6 transcription repressor                      | 203140_at   | -2.172 | 0.001 | 1621 | 921  | -1.8 | -1.1 | 1.6  |
| <i>RMND5A</i>  | required for meiotic nuclear division 5 homolog A | 212482_at   | -2.172 | 0.001 | 477  | 289  | -1.6 | -1.2 | -2.0 |
| <i>PDLIM1</i>  | PDZ and LIM domain 1                              | 208690_s_at | -2.172 | 0.001 | 2031 | 1285 | -1.6 | -1.2 | 5.9  |
| <i>ESRP1</i>   | epithelial splicing regulatory protein 1          | 225846_at   | -2.171 | 0.001 | 1254 | 428  | -2.9 | -1.1 | -6.1 |
| <i>ITSN2</i>   | intersectin 2                                     | 209898_x_at | -2.171 | 0.001 | 875  | 490  | -1.8 | 1.5  | -1.1 |
| <i>MED13</i>   | mediator complex subunit 13                       | 201987_at   | -2.168 | 0.001 | 1055 | 631  | -1.7 | 1.0  | -1.3 |
| <i>GLTP</i>    | glycolipid transfer protein                       | 226177_at   | -2.167 | 0.001 | 4904 | 2298 | -2.1 | -1.3 | 1.5  |
| <i>SPINT2</i>  | serine peptidase inhibitor, Kunitz type 2         | 210715_s_at | -2.165 | 0.001 | 935  | 427  | -2.2 | -1.5 | -1.3 |
| <i>MRTFB</i>   | myocardin related transcription factor B          | 218259_at   | -2.165 | 0.001 | 693  | 440  | -1.6 | 1.0  | -1.1 |

|                  |                                                    |             |        |       |      |      |      |      |      |
|------------------|----------------------------------------------------|-------------|--------|-------|------|------|------|------|------|
| <i>SAR1B</i>     | secretion associated Ras related GTPase 1B         | 226742_at   | -2.164 | 0.001 | 510  | 294  | -1.7 | 1.0  | 1.2  |
| <i>KRT23</i>     | keratin 23                                         | 218963_s_at | -2.158 | 0.001 | 1164 | 296  | -3.9 | -1.2 | 1.1  |
| <i>CAV2</i>      | caveolin 2                                         | 203323_at   | -2.157 | 0.001 | 1164 | 668  | -1.7 | -1.5 | -1.8 |
| <i>ZYG11B</i>    | zyg-11 family member B, cell cycle regulator       | 225338_at   | -2.157 | 0.001 | 447  | 271  | -1.7 | 1.1  | 1.1  |
| <i>ETFRF1</i>    | electron transfer flavoprotein regulatory factor 1 | 225469_at   | -2.155 | 0.001 | 964  | 575  | -1.7 | 1.1  | -1.1 |
| <i>PPP1CB</i>    | protein phosphatase 1 catalytic subunit beta       | 201409_s_at | -2.153 | 0.001 | 1578 | 766  | -2.1 | 1.5  | -1.1 |
| <i>MYOF</i>      | myoferlin                                          | 201798_s_at | -2.153 | 0.001 | 1383 | 876  | -1.6 | -1.1 | 17.4 |
| <i>GPR157</i>    | G protein-coupled receptor 157                     | 227970_at   | -2.153 | 0.001 | 574  | 288  | -2.0 | -1.4 | -1.3 |
| <i>ITPRID2</i>   | ITPR interacting domain containing 2               | 202506_at   | -2.152 | 0.001 | 1500 | 943  | -1.6 | 1.0  | 1.8  |
| <i>CCSER2</i>    | coiled-coil serine rich protein 2                  | 209379_s_at | -2.152 | 0.001 | 514  | 284  | -1.8 | -1.2 | -1.2 |
| <i>EGLN3</i>     | egl-9 family hypoxia inducible factor 3            | 219232_s_at | -2.152 | 0.001 | 352  | 138  | -2.6 | -1.7 | -1.5 |
| <i>RAB11FIP1</i> | RAB11 family interacting protein 1                 | 219681_s_at | -2.151 | 0.001 | 693  | 345  | -2.0 | -1.3 | -1.1 |
| <i>SERPINA12</i> | serpin family A member 12                          | 1552544_at  | -2.151 | 0.001 | 791  | 283  | -2.8 | -1.6 | ND   |
| <i>RAB27B</i>    | RAB27B, member RAS oncogene family                 | 228708_at   | -2.149 | 0.001 | 1079 | 279  | -3.9 | -1.1 | 1.6  |
| <i>C2orf69</i>   | chromosome 2 open reading frame 69                 | 238974_at   | -2.148 | 0.001 | 832  | 478  | -1.7 | 1.2  | -1.0 |
| <i>LYPLA1</i>    | lysophospholipase 1                                | 212449_s_at | -2.145 | 0.001 | 1956 | 952  | -2.1 | 1.4  | 1.9  |
| <i>SMAD1</i>     | SMAD family member 1                               | 210993_s_at | -2.144 | 0.001 | 499  | 270  | -1.8 | -1.0 | -3.2 |
| <i>ZMPSTE24</i>  | zinc metalloproteinase STE24                       | 202939_at   | -2.143 | 0.001 | 1180 | 780  | -1.5 | 1.2  | 1.5  |
| <i>CSNK1A1</i>   | casein kinase 1 alpha 1                            | 208865_at   | -2.143 | 0.001 | 2372 | 1353 | -1.8 | -1.1 | -1.7 |
| <i>SDC1</i>      | syndecan 1                                         | 201287_s_at | -2.142 | 0.001 | 2492 | 1090 | -2.3 | -1.5 | 1.9  |
| <i>EXPH5</i>     | exophilin 5                                        | 214734_at   | -2.142 | 0.001 | 831  | 279  | -3.0 | -2.8 | 1.4  |
| <i>SYTL1</i>     | synaptotagmin like 1                               | 227134_at   | -2.141 | 0.001 | 793  | 223  | -3.6 | -1.4 | 1.1  |
| <i>CREG1</i>     | cellular repressor of E1A stimulated genes 1       | 201200_at   | -2.140 | 0.001 | 3706 | 2024 | -1.8 | 1.2  | -2.0 |
| <i>PTPRF</i>     | protein tyrosine phosphatase receptor type F       | 200636_s_at | -2.139 | 0.001 | 1486 | 691  | -2.1 | -1.9 | 13.1 |
| <i>CEBPG</i>     | CCAAT enhancer binding protein gamma               | 225527_at   | -2.138 | 0.001 | 350  | 200  | -1.8 | 1.2  | 1.1  |
| <i>SPOPL</i>     | speckle type BTB/POZ protein like                  | 225658_at   | -2.136 | 0.001 | 424  | 210  | -2.0 | 1.2  | 1.1  |
| <i>MBNL1</i>     | muscleblind like splicing regulator 1              | 201153_s_at | -2.136 | 0.001 | 1716 | 1088 | -1.6 | 1.1  | -1.1 |

|                 |                                                                                                   |             |        |       |      |      |      |      |      |
|-----------------|---------------------------------------------------------------------------------------------------|-------------|--------|-------|------|------|------|------|------|
| <i>SMAD5</i>    | SMAD family member 5                                                                              | 225223_at   | -2.132 | 0.001 | 490  | 258  | -1.9 | -1.1 | -1.0 |
| <i>IFNGR1</i>   | interferon gamma receptor 1                                                                       | 211676_s_at | -2.132 | 0.001 | 910  | 589  | -1.5 | 1.6  | -1.3 |
| <i>SREK1</i>    | splicing regulatory glutamic acid and lysine rich protein 1                                       | 212721_at   | -2.126 | 0.001 | 762  | 476  | -1.6 | 1.4  | -1.5 |
| <i>ASS1</i>     | argininosuccinate synthase 1                                                                      | 207076_s_at | -2.125 | 0.001 | 502  | 254  | -2.0 | -1.9 | 1.4  |
| <i>CSTA</i>     | cystatin A                                                                                        | 204971_at   | -2.120 | 0.001 | 8691 | 4742 | -1.8 | 1.2  | 1.2  |
| <i>PIK3R1</i>   | phosphoinositide-3-kinase regulatory subunit 1                                                    | 212240_s_at | -2.119 | 0.001 | 1197 | 649  | -1.8 | 1.3  | -1.0 |
| <i>TMTC3</i>    | transmembrane and tetratricopeptide repeat containing 3                                           | 226604_at   | -2.117 | 0.001 | 414  | 136  | -3.0 | 1.0  | 1.7  |
| <i>KLK7</i>     | kallikrein related peptidase 7                                                                    | 205778_at   | -2.114 | 0.001 | 1925 | 769  | -2.5 | 1.1  | -1.0 |
| <i>PKP1</i>     | plakophilin 1                                                                                     | 221854_at   | -2.114 | 0.001 | 2006 | 828  | -2.4 | -2.1 | 1.0  |
| <i>FRMD4B</i>   | FERM domain containing 4B                                                                         | 213056_at   | -2.111 | 0.001 | 522  | 302  | -1.7 | -1.5 | -1.5 |
| <i>COX7B</i>    | cytochrome c oxidase subunit 7B                                                                   | 202110_at   | -2.110 | 0.001 | 3528 | 2309 | -1.5 | 1.4  | 1.2  |
| <i>NXT2</i>     | nuclear transport factor 2 like export factor 2                                                   | 209628_at   | -2.109 | 0.001 | 317  | 152  | -2.1 | 1.2  | 1.0  |
| <i>SMARCA2</i>  | SWI/SNF related, matrix associated, actin dependent regulator of chromatin, subfamily a, member 2 | 206542_s_at | -2.107 | 0.001 | 535  | 329  | -1.6 | -1.5 | -2.4 |
| <i>LY6G6C</i>   | lymphocyte antigen 6 family member G6C                                                            | 207114_at   | -2.105 | 0.001 | 1824 | 580  | -3.1 | -1.5 | 1.1  |
| <i>ANKRD22</i>  | ankyrin repeat domain 22                                                                          | 238439_at   | -2.100 | 0.001 | 556  | 167  | -3.3 | 1.1  | -1.3 |
| <i>JUP</i>      | junction plakoglobin                                                                              | 201015_s_at | -2.098 | 0.001 | 2595 | 1188 | -2.2 | -1.6 | -1.3 |
| <i>HSDL2</i>    | hydroxysteroid dehydrogenase like 2                                                               | 209513_s_at | -2.096 | 0.001 | 591  | 288  | -2.1 | -1.2 | -1.2 |
| <i>YES1</i>     | YES proto-oncogene 1, Src family tyrosine kinase                                                  | 202932_at   | -2.095 | 0.001 | 507  | 288  | -1.8 | 1.5  | 2.0  |
| <i>WDR26</i>    | WD repeat domain 26                                                                               | 224897_at   | -2.094 | 0.001 | 822  | 471  | -1.7 | 1.4  | -1.2 |
| <i>EPPK1</i>    | epiplakin 1                                                                                       | 232164_s_at | -2.088 | 0.001 | 1517 | 503  | -3.0 | -2.1 | -1.0 |
| <i>FBXO3</i>    | F-box protein 3                                                                                   | 218432_at   | -2.085 | 0.001 | 467  | 205  | -2.3 | 1.1  | -1.7 |
| <i>CNOT6</i>    | CCR4-NOT transcription complex subunit 6                                                          | 222476_at   | -2.083 | 0.001 | 400  | 244  | -1.6 | -1.1 | -1.3 |
| <i>GPBP1L1</i>  | GC-rich promoter binding protein 1 like 1                                                         | 217877_s_at | -2.083 | 0.001 | 597  | 395  | -1.5 | -1.2 | 1.1  |
| <i>CRCT1</i>    | cysteine rich C-terminal 1                                                                        | 220620_at   | -2.081 | 0.001 | 803  | 293  | -2.7 | -1.2 | 1.1  |
| <i>FGFR1OP2</i> | FGFR1 oncogene partner 2                                                                          | 233898_s_at | -2.080 | 0.001 | 397  | 216  | -1.8 | 1.2  | -1.4 |



|                 |                                                                |             |        |       |      |      |      |      |      |
|-----------------|----------------------------------------------------------------|-------------|--------|-------|------|------|------|------|------|
| <i>CDC42SE2</i> | CDC42 small effector 2                                         | 224709_s_at | -2.079 | 0.001 | 801  | 484  | -1.7 | 1.0  | -2.4 |
| <i>TSPAN5</i>   | tetraspanin 5                                                  | 225387_at   | -2.078 | 0.001 | 348  | 178  | -2.0 | -1.2 | 1.2  |
| <i>IL20RB</i>   | interleukin 20 receptor subunit beta                           | 228575_at   | -2.078 | 0.001 | 503  | 148  | -3.4 | -1.8 | 1.1  |
| <i>DSG1</i>     | desmoglein 1                                                   | 206642_at   | -2.077 | 0.001 | 2871 | 963  | -3.0 | -1.4 | 1.2  |
| <i>NEBL</i>     | nebullette                                                     | 203962_s_at | -2.077 | 0.001 | 571  | 153  | -3.7 | -1.5 | -1.1 |
| <i>C12orf29</i> | chromosome 12 open reading frame 29                            | 213701_at   | -2.076 | 0.001 | 440  | 168  | -2.6 | -1.1 | 1.6  |
| <i>EFR3A</i>    | EFR3 homolog A                                                 | 212149_at   | -2.074 | 0.001 | 1465 | 964  | -1.5 | 1.1  | 1.7  |
| <i>ZBTB44</i>   | zinc finger and BTB domain containing 44                       | 225845_at   | -2.073 | 0.001 | 530  | 212  | -2.5 | -1.0 | -1.1 |
| <i>SCEL</i>     | sciellin                                                       | 206884_s_at | -2.073 | 0.001 | 1054 | 221  | -4.8 | -1.3 | -1.0 |
| <i>CD47</i>     | CD47 molecule                                                  | 226016_at   | -2.073 | 0.001 | 962  | 609  | -1.6 | -1.2 | -2.2 |
| <i>GRHL1</i>    | grainyhead like transcription factor 1                         | 222830_at   | -2.072 | 0.001 | 1529 | 441  | -3.5 | 1.2  | 1.2  |
| <i>ATP7A</i>    | ATPase copper transporting alpha                               | 205197_s_at | -2.071 | 0.001 | 553  | 267  | -2.1 | 1.1  | -2.7 |
| <i>SCAMP1</i>   | secretory carrier membrane protein 1                           | 212416_at   | -2.071 | 0.001 | 753  | 476  | -1.6 | -1.1 | 1.3  |
| <i>GOLPH3L</i>  | golgi phosphoprotein 3 like                                    | 218361_at   | -2.071 | 0.001 | 413  | 261  | -1.6 | -1.0 | -1.1 |
| <i>GGCT</i>     | gamma-glutamylcyclotransferase                                 | 215380_s_at | -2.070 | 0.001 | 2675 | 1479 | -1.8 | 2.0  | 2.0  |
| <i>TCF4</i>     | transcription factor 4                                         | 212386_at   | -2.068 | 0.001 | 1437 | 848  | -1.7 | -1.1 | 3.2  |
| <i>S100A14</i>  | S100 calcium binding protein A14                               | 218677_at   | -2.067 | 0.001 | 1432 | 707  | -2.0 | -1.4 | 1.1  |
| <i>TUT7</i>     | terminal uridylyl transferase 7                                | 220933_s_at | -2.064 | 0.001 | 729  | 382  | -1.9 | 1.3  | -1.0 |
| <i>CST6</i>     | cystatin E/M                                                   | 206595_at   | -2.060 | 0.001 | 6510 | 1369 | -4.8 | -1.4 | -1.3 |
| <i>STRN</i>     | striatin                                                       | 227422_at   | -2.059 | 0.001 | 300  | 151  | -2.0 | -1.0 | 1.0  |
| <i>LGALS1</i>   | galectin like                                                  | 226188_at   | -2.059 | 0.001 | 1827 | 895  | -2.0 | -1.4 | 1.2  |
| <i>SEPTIN10</i> | septin 10                                                      | 212698_s_at | -2.055 | 0.001 | 1207 | 792  | -1.5 | -1.1 | -1.3 |
| <i>FAM126B</i>  | family with sequence similarity 126 member B                   | 229460_at   | -2.054 | 0.001 | 330  | 134  | -2.5 | 1.9  | 1.1  |
| <i>HEBP2</i>    | heme binding protein 2                                         | 203430_at   | -2.051 | 0.001 | 1576 | 905  | -1.7 | -1.2 | -1.2 |
| <i>MAST4</i>    | microtubule associated serine/threonine kinase family member 4 | 225611_at   | -2.049 | 0.001 | 612  | 259  | -2.4 | -1.1 | -1.5 |
| <i>OXR1</i>     | oxidation resistance 1                                         | 222553_x_at | -2.049 | 0.001 | 519  | 236  | -2.2 | 1.2  | -1.3 |
| <i>PER3</i>     | period circadian regulator 3                                   | 221045_s_at | -2.048 | 0.001 | 380  | 222  | -1.7 | 1.3  | -1.6 |
| <i>CLTB</i>     | clathrin light chain B                                         | 211043_s_at | -2.045 | 0.001 | 1578 | 834  | -1.9 | -1.1 | -1.2 |
| <i>SMIM14</i>   | small integral membrane protein 14                             | 227052_at   | -2.045 | 0.001 | 707  | 347  | -2.0 | -1.1 | -3.0 |
| <i>MAF</i>      | MAF bZIP transcription factor                                  | 209348_s_at | -2.044 | 0.001 | 1584 | 854  | -1.9 | -1.2 | -6.9 |
| <i>KDM7A</i>    | lysine demethylase 7A                                          | 221778_at   | -2.041 | 0.001 | 399  | 240  | -1.7 | 1.2  | -1.0 |

|                |                                                         |             |        |       |      |      |      |      |      |
|----------------|---------------------------------------------------------|-------------|--------|-------|------|------|------|------|------|
| <i>ZNF770</i>  | zinc finger protein 770                                 | 225517_at   | -2.039 | 0.001 | 776  | 352  | -2.2 | 1.2  | -1.1 |
| <i>WDR11</i>   | WD repeat domain 11                                     | 229694_at   | -2.039 | 0.001 | 483  | 206  | -2.3 | 2.3  | -1.6 |
| <i>MPZL3</i>   | myelin protein zero like 3                              | 227747_at   | -2.038 | 0.001 | 522  | 144  | -3.6 | 1.0  | 1.2  |
| <i>PSMD12</i>  | proteasome 26S subunit, non-ATPase 12                   | 202353_s_at | -2.036 | 0.001 | 590  | 309  | -1.9 | 1.0  | 1.7  |
| <i>CAT</i>     | catalase                                                | 201432_at   | -2.035 | 0.001 | 2116 | 1363 | -1.6 | -1.2 | -3.6 |
| <i>RAB25</i>   | RAB25, member RAS oncogene family                       | 218186_at   | -2.033 | 0.001 | 1396 | 499  | -2.8 | -1.1 | 1.0  |
| <i>AQP3</i>    | aquaporin 3 (Gill blood group)                          | 39248_at    | -2.031 | 0.001 | 4125 | 1810 | -2.3 | -1.1 | 1.3  |
| <i>BMPR2</i>   | bone morphogenetic protein receptor type 2              | 225144_at   | -2.030 | 0.001 | 1044 | 589  | -1.8 | 1.3  | -1.7 |
| <i>CCDC3</i>   | coiled-coil domain containing 3                         | 223316_at   | -2.028 | 0.001 | 1062 | 489  | -2.2 | -3.1 | 1.4  |
| <i>NIPAL2</i>  | NIPA like domain containing 2                           | 227001_at   | -2.025 | 0.001 | 796  | 297  | -2.7 | -1.1 | -1.0 |
| <i>CDS1</i>    | CDP-diacylglycerol synthase 1                           | 205709_s_at | -2.025 | 0.001 | 389  | 104  | -3.8 | 1.1  | -1.1 |
| <i>REL</i>     | REL proto-oncogene, NF-kB subunit                       | 235242_at   | -2.024 | 0.001 | 758  | 400  | -1.9 | 1.2  | -1.0 |
| <i>CRYBG1</i>  | crystallin beta-gamma domain containing 1               | 212543_at   | -2.023 | 0.001 | 1071 | 477  | -2.2 | -1.2 | 1.8  |
| <i>PTPN21</i>  | protein tyrosine phosphatase non-receptor type 21       | 226380_at   | -2.021 | 0.001 | 345  | 183  | -1.9 | -1.6 | -2.4 |
| <i>FAM135A</i> | family with sequence similarity 135 member A            | 223497_at   | -2.020 | 0.001 | 410  | 145  | -2.8 | 1.0  | -1.2 |
| <i>F2RL1</i>   | F2R like trypsin receptor 1                             | 213506_at   | -2.020 | 0.001 | 494  | 177  | -2.8 | -1.6 | 1.1  |
| <i>LYPD3</i>   | LY6/PLAUR domain containing 3                           | 204952_at   | -2.019 | 0.001 | 3004 | 1461 | -2.1 | -1.3 | -1.2 |
| <i>PPP3CA</i>  | protein phosphatase 3 catalytic subunit alpha           | 202457_s_at | -2.018 | 0.001 | 939  | 581  | -1.6 | -1.2 | -1.1 |
| <i>ITGB4</i>   | integrin subunit beta 4                                 | 204990_s_at | -2.017 | 0.001 | 494  | 261  | -1.9 | -1.8 | -1.2 |
| <i>SCNN1A</i>  | sodium channel epithelial 1 alpha subunit               | 203453_at   | -2.016 | 0.001 | 895  | 363  | -2.5 | -1.3 | -1.0 |
| <i>PRRG4</i>   | proline rich and Gla domain 4                           | 238513_at   | -2.015 | 0.001 | 682  | 210  | -3.3 | -1.2 | 1.2  |
| <i>MKNK2</i>   | MAPK interacting serine/threonine kinase 2              | 218205_s_at | -2.015 | 0.001 | 1977 | 1303 | -1.5 | -1.1 | -1.9 |
| <i>LIN7C</i>   | lin-7 homolog C, crumbs cell polarity complex component | 223350_x_at | -2.011 | 0.001 | 584  | 341  | -1.7 | -1.1 | 1.3  |
| <i>PNPLA8</i>  | patatin like phospholipase domain containing 8          | 223310_x_at | -2.009 | 0.001 | 920  | 572  | -1.6 | 1.9  | -1.2 |
| <i>XG</i>      | Xg glycoprotein (Xg blood group)                        | 1554062_at  | -2.008 | 0.001 | 383  | 108  | -3.6 | -1.2 | ND   |

|                 |                                                         |              |        |       |      |      |      |      |       |
|-----------------|---------------------------------------------------------|--------------|--------|-------|------|------|------|------|-------|
| <i>CPEB2</i>    | cytoplasmic polyadenylation element binding protein 2   | 226939_at    | -2.005 | 0.001 | 1397 | 582  | -2.4 | -1.1 | -11.9 |
| <i>TAOK1</i>    | TAO kinase 1                                            | 224769_at    | -2.005 | 0.001 | 1201 | 755  | -1.6 | 1.1  | 1.1   |
| <i>MAL2</i>     | mal, T cell differentiation protein 2 (gene/pseudogene) | 224650_at    | -2.003 | 0.001 | 1208 | 395  | -3.1 | -1.1 | -1.1  |
| <i>SLAIN2</i>   | SLAIN motif family member 2                             | 224844_at    | -1.999 | 0.001 | 482  | 260  | -1.9 | -1.1 | -1.0  |
| <i>OCLN</i>     | occludin                                                | 227492_at    | -1.999 | 0.001 | 333  | 153  | -2.2 | -1.2 | 2.2   |
| <i>IRF6</i>     | interferon regulatory factor 6                          | 202597_at    | -1.998 | 0.001 | 965  | 444  | -2.2 | -2.0 | -1.1  |
| <i>ANKRD12</i>  | ankyrin repeat domain 12                                | 212286_at    | -1.996 | 0.001 | 305  | 182  | -1.7 | 1.3  | -2.0  |
| <i>FAM177A1</i> | family with sequence similarity 177 member A1           | 227029_at    | -1.995 | 0.001 | 654  | 371  | -1.8 | -1.0 | -1.8  |
| <i>RAPGEFL1</i> | Rap guanine nucleotide exchange factor like 1           | 218657_at    | -1.993 | 0.001 | 462  | 182  | -2.5 | -1.7 | 1.0   |
| <i>VAV3</i>     | vav guanine nucleotide exchange factor 3                | 218807_at    | -1.992 | 0.001 | 491  | 215  | -2.3 | -1.5 | 1.3   |
| <i>CLK4</i>     | CDC like kinase 4                                       | 210346_s_at  | -1.992 | 0.001 | 467  | 237  | -2.0 | 1.6  | -1.7  |
| <i>VPS13A</i>   | vacuolar protein sorting 13 homolog A                   | 227988_s_at  | -1.992 | 0.001 | 405  | 211  | -1.9 | 1.4  | 1.0   |
| <i>MAPK6</i>    | mitogen-activated protein kinase 6                      | 207121_s_at  | -1.992 | 0.001 | 1354 | 741  | -1.8 | 1.3  | 1.2   |
| <i>PARD6G</i>   | par-6 family cell polarity regulator gamma              | 227204_at    | -1.991 | 0.001 | 647  | 388  | -1.7 | -1.7 | -2.2  |
| <i>AZGP1</i>    | alpha-2-glycoprotein 1, zinc-binding                    | 209309_at    | -1.990 | 0.001 | 1273 | 448  | -2.8 | -1.2 | 2.0   |
| <i>CCDC186</i>  | coiled-coil domain containing 186                       | 227701_at    | -1.990 | 0.001 | 252  | 90   | -2.8 | 1.2  | -1.1  |
| <i>YTHDC2</i>   | YTH domain containing 2                                 | 213077_at    | -1.988 | 0.001 | 364  | 195  | -1.9 | 1.3  | -1.6  |
| <i>TACC2</i>    | transforming acidic coiled-coil containing protein 2    | 202289_s_at  | -1.988 | 0.001 | 618  | 231  | -2.7 | -1.6 | 1.8   |
| <i>FAM174A</i>  | family with sequence similarity 174 member A            | 226752_at    | -1.986 | 0.001 | 574  | 345  | -1.7 | -1.3 | -1.5  |
| <i>CDH1</i>     | cadherin 1                                              | 201131_s_at  | -1.985 | 0.001 | 2607 | 1594 | -1.6 | -1.0 | -94.8 |
| <i>TANK</i>     | TRAF family member associated NFKB activator            | 209451_at    | -1.984 | 0.001 | 556  | 367  | -1.5 | 1.8  | -1.2  |
| <i>GNA15</i>    | G protein subunit alpha 15                              | 205349_at    | -1.984 | 0.001 | 426  | 258  | -1.7 | 1.3  | -1.2  |
| <i>BLMH</i>     | bleomycin hydrolase                                     | 202179_at    | -1.983 | 0.001 | 912  | 411  | -2.2 | -1.5 | -1.5  |
| <i>SUB1</i>     | SUB1 regulator of transcription                         | 221727_at    | -1.981 | 0.001 | 461  | 251  | -1.8 | 1.7  | -1.0  |
| <i>PROM2</i>    | prominin 2                                              | 1552797_s_at | -1.978 | 0.001 | 737  | 269  | -2.7 | -1.3 | ND    |
| <i>KLK8</i>     | kallikrein related peptidase 8                          | 206125_s_at  | -1.977 | 0.001 | 1254 | 594  | -2.1 | 1.1  | -1.2  |

|                |                                                                              |             |        |       |      |      |      |      |      |
|----------------|------------------------------------------------------------------------------|-------------|--------|-------|------|------|------|------|------|
| <i>WAPL</i>    | WAPL cohesin release factor                                                  | 212267_at   | -1.972 | 0.001 | 491  | 300  | -1.6 | 1.0  | -1.3 |
| <i>PPP2R3A</i> | protein phosphatase 2 regulatory subunit B''alpha                            | 209633_at   | -1.972 | 0.001 | 600  | 355  | -1.7 | -1.8 | -1.3 |
| <i>CDSN</i>    | corneodesmosin                                                               | 206192_at   | -1.969 | 0.001 | 1705 | 752  | -2.3 | -1.3 | 1.1  |
| <i>ATL3</i>    | atlastin GTPase 3                                                            | 224893_at   | -1.969 | 0.001 | 1222 | 795  | -1.5 | -1.3 | -1.1 |
| <i>COL4A5</i>  | collagen type IV alpha 5 chain                                               | 213110_s_at | -1.968 | 0.001 | 393  | 113  | -3.5 | -1.5 | 1.1  |
| <i>DNAJC21</i> | DnaJ heat shock protein family (Hsp40) member C21                            | 235032_at   | -1.964 | 0.001 | 429  | 241  | -1.8 | 1.3  | 1.0  |
| <i>ETS2</i>    | ETS proto-oncogene 2, transcription factor                                   | 201328_at   | -1.964 | 0.001 | 577  | 304  | -1.9 | -1.3 | 1.4  |
| <i>TET3</i>    | tet methylcytosine dioxygenase 3                                             | 235542_at   | -1.963 | 0.001 | 393  | 221  | -1.8 | -1.3 | 1.8  |
| <i>QSER1</i>   | glutamine and serine rich 1                                                  | 226265_at   | -1.962 | 0.001 | 758  | 442  | -1.7 | -1.2 | 2.6  |
| <i>ELOVL7</i>  | ELOVL fatty acid elongase 7                                                  | 227180_at   | -1.961 | 0.001 | 919  | 246  | -3.7 | 1.2  | 1.1  |
| <i>RB1CC1</i>  | RB1 inducible coiled-coil 1                                                  | 202033_s_at | -1.961 | 0.001 | 841  | 425  | -2.0 | 1.7  | -1.1 |
| <i>PAWR</i>    | pro-apoptotic WT1 regulator                                                  | 226223_at   | -1.960 | 0.001 | 665  | 191  | -3.5 | 1.0  | 3.2  |
| <i>ZNF782</i>  | zinc finger protein 782                                                      | 228156_at   | -1.960 | 0.001 | 286  | 140  | -2.0 | -1.1 | -1.5 |
| <i>CYBRD1</i>  | cytochrome b reductase 1                                                     | 222453_at   | -1.959 | 0.001 | 1447 | 876  | -1.7 | -1.5 | 1.1  |
| <i>PCMTD1</i>  | protein-L-isoaspartate (D-aspartate) O-methyltransferase domain containing 1 | 226119_at   | -1.959 | 0.001 | 763  | 398  | -1.9 | 1.4  | -3.2 |
| <i>RNF217</i>  | ring finger protein 217                                                      | 226885_at   | -1.959 | 0.001 | 245  | 81   | -3.0 | 1.1  | 1.2  |
| <i>USP38</i>   | ubiquitin specific peptidase 38                                              | 223288_at   | -1.959 | 0.001 | 470  | 244  | -1.9 | 1.3  | -1.3 |
| <i>C5orf24</i> | chromosome 5 open reading frame 24                                           | 224876_at   | -1.958 | 0.001 | 1069 | 613  | -1.7 | -1.0 | -1.5 |
| <i>RBM27</i>   | RNA binding motif protein 27                                                 | 225326_at   | -1.956 | 0.001 | 507  | 301  | -1.7 | 1.1  | 1.3  |
| <i>MCUR1</i>   | mitochondrial calcium uniporter regulator 1                                  | 227451_s_at | -1.956 | 0.001 | 460  | 268  | -1.7 | -1.1 | 1.1  |
| <i>GPX3</i>    | glutathione peroxidase 3                                                     | 201348_at   | -1.956 | 0.001 | 2226 | 1233 | -1.8 | -2.1 | -1.1 |
| <i>CLIP1</i>   | CAP-Gly domain containing linker protein 1                                   | 210716_s_at | -1.954 | 0.001 | 552  | 292  | -1.9 | -1.0 | -1.9 |
| <i>ACTR3</i>   | actin related protein 3                                                      | 228603_at   | -1.953 | 0.001 | 381  | 203  | -1.9 | 1.4  | -1.0 |
| <i>MYCBP2</i>  | MYC binding protein 2                                                        | 201960_s_at | -1.952 | 0.001 | 1808 | 989  | -1.8 | -1.0 | -1.8 |
| <i>LRATD1</i>  | LRAT domain containing 1                                                     | 225667_s_at | -1.951 | 0.001 | 1142 | 447  | -2.6 | 1.0  | 1.2  |
| <i>KCNK1</i>   | potassium two pore domain channel subfamily K member 1                       | 204679_at   | -1.950 | 0.001 | 440  | 185  | -2.4 | -1.2 | -1.0 |

|                |                                                                      |             |        |       |      |     |      |      |       |
|----------------|----------------------------------------------------------------------|-------------|--------|-------|------|-----|------|------|-------|
| <i>RBBP8</i>   | RB binding protein 8, endonuclease                                   | 203344_s_at | -1.950 | 0.001 | 636  | 414 | -1.5 | 1.7  | 1.7   |
| <i>CDHR1</i>   | cadherin related family member 1                                     | 213369_at   | -1.950 | 0.001 | 312  | 117 | -2.7 | -2.7 | 1.1   |
| <i>TJP2</i>    | tight junction protein 2                                             | 202085_at   | -1.950 | 0.001 | 470  | 237 | -2.0 | 1.2  | -1.2  |
| <i>CLEC2B</i>  | C-type lectin domain family 2 member B                               | 209732_at   | -1.950 | 0.001 | 1379 | 831 | -1.7 | 1.4  | 2.5   |
| <i>BAZ1A</i>   | bromodomain adjacent to zinc finger domain 1A                        | 217986_s_at | -1.949 | 0.001 | 504  | 295 | -1.7 | 1.8  | 1.7   |
| <i>CSNK2A2</i> | casein kinase 2 alpha 2                                              | 203575_at   | -1.948 | 0.001 | 670  | 365 | -1.8 | -1.3 | -3.7  |
| <i>CUL5</i>    | cullin 5                                                             | 203531_at   | -1.947 | 0.001 | 621  | 342 | -1.8 | 1.2  | 1.1   |
| <i>PTPRK</i>   | protein tyrosine phosphatase receptor type K                         | 203038_at   | -1.947 | 0.001 | 640  | 366 | -1.8 | 1.0  | 1.5   |
| <i>USO1</i>    | USO1 vesicle transport factor                                        | 201832_s_at | -1.945 | 0.001 | 934  | 595 | -1.6 | 1.2  | 1.1   |
| <i>HAL</i>     | histidine ammonia-lyase                                              | 217521_at   | -1.944 | 0.001 | 540  | 208 | -2.6 | -1.2 | 1.1   |
| <i>CASP14</i>  | caspase 14                                                           | 231722_at   | -1.943 | 0.001 | 594  | 206 | -2.9 | -1.3 | -1.0  |
| <i>GATM</i>    | glycine amidinotransferase                                           | 216733_s_at | -1.942 | 0.001 | 664  | 295 | -2.2 | -2.1 | -1.9  |
| <i>SULT2B1</i> | sulfotransferase family 2B member 1                                  | 205759_s_at | -1.942 | 0.001 | 482  | 183 | -2.6 | -1.2 | 1.0   |
| <i>OGA</i>     | O-GlcNAcase                                                          | 223494_at   | -1.941 | 0.001 | 931  | 563 | -1.7 | 1.7  | -1.2  |
| <i>FGFR2</i>   | fibroblast growth factor receptor 2                                  | 203638_s_at | -1.939 | 0.001 | 422  | 159 | -2.7 | -2.7 | -1.0  |
| <i>LNPEP</i>   | leucyl and cystinyl aminopeptidase                                   | 225176_at   | -1.939 | 0.001 | 764  | 408 | -1.9 | -1.0 | -1.2  |
| <i>COL17A1</i> | collagen type XVII alpha 1 chain                                     | 204636_at   | -1.938 | 0.001 | 413  | 163 | -2.5 | -3.1 | -1.0  |
| <i>SDR16C5</i> | short chain dehydrogenase/reductase family 16C member 5              | 238017_at   | -1.937 | 0.001 | 1111 | 349 | -3.2 | 1.0  | 1.0   |
| <i>PPM1B</i>   | protein phosphatase, Mg <sup>2+</sup> /Mn <sup>2+</sup> dependent 1B | 209296_at   | -1.936 | 0.001 | 616  | 352 | -1.8 | 1.3  | -2.0  |
| <i>DMXL1</i>   | Dmx like 1                                                           | 203791_at   | -1.935 | 0.001 | 441  | 197 | -2.2 | 1.0  | -11.2 |
| <i>PDZD2</i>   | PDZ domain containing 2                                              | 209493_at   | -1.934 | 0.001 | 514  | 161 | -3.2 | -1.6 | -1.3  |
| <i>RAB3D</i>   | RAB3D, member RAS oncogene family                                    | 225001_at   | -1.934 | 0.001 | 749  | 450 | -1.7 | -1.6 | -1.5  |
| <i>EHF</i>     | ETS homologous factor                                                | 225645_at   | -1.934 | 0.001 | 1276 | 409 | -3.1 | 1.2  | 3.5   |
| <i>TMEM40</i>  | transmembrane protein 40                                             | 222892_s_at | -1.934 | 0.001 | 770  | 331 | -2.3 | 1.2  | -1.1  |
| <i>POF1B</i>   | POF1B actin binding protein                                          | 219756_s_at | -1.932 | 0.001 | 474  | 134 | -3.5 | -1.5 | 1.0   |
| <i>RPS6KB1</i> | ribosomal protein S6 kinase B1                                       | 226660_at   | -1.932 | 0.001 | 485  | 277 | -1.8 | 1.3  | 1.1   |
| <i>CLINT1</i>  | clathrin interactor 1                                                | 201769_at   | -1.931 | 0.001 | 1118 | 667 | -1.7 | 1.2  | -1.0  |
| <i>CLK1</i>    | CDC like kinase 1                                                    | 214683_s_at | -1.929 | 0.001 | 663  | 363 | -1.8 | 1.9  | -1.2  |
| <i>SH3RF2</i>  | SH3 domain containing ring finger 2                                  | 243582_at   | -1.928 | 0.001 | 363  | 123 | -2.9 | -1.5 | 1.3   |

|                 |                                                           |             |        |       |      |      |      |      |      |
|-----------------|-----------------------------------------------------------|-------------|--------|-------|------|------|------|------|------|
| <i>SGMS1</i>    | sphingomyelin synthase 1                                  | 212989_at   | -1.925 | 0.001 | 331  | 158  | -2.1 | -1.1 | 1.4  |
| <i>BCL11B</i>   | BAF chromatin remodeling complex subunit BCL11B           | 222895_s_at | -1.925 | 0.001 | 914  | 378  | -2.4 | -1.3 | -1.0 |
| <i>CRIPAK</i>   | cysteine rich PAK1 inhibitor                              | 228318_s_at | -1.923 | 0.001 | 520  | 335  | -1.6 | 1.2  | -1.4 |
| <i>GAN</i>      | gigaxonin                                                 | 228567_at   | -1.922 | 0.001 | 826  | 194  | -4.3 | -1.8 | 1.1  |
| <i>CAPNS2</i>   | calpain small subunit 2                                   | 223832_s_at | -1.921 | 0.001 | 656  | 221  | -3.0 | -1.3 | 1.3  |
| <i>SNX13</i>    | sorting nexin 13                                          | 227031_at   | -1.920 | 0.001 | 336  | 161  | -2.1 | 1.1  | -1.3 |
| <i>CREB1</i>    | cAMP responsive element binding protein 1                 | 204314_s_at | -1.919 | 0.001 | 365  | 227  | -1.6 | 1.1  | -1.2 |
| <i>EXOC1</i>    | exocyst complex component 1                               | 222127_s_at | -1.919 | 0.001 | 815  | 489  | -1.7 | 1.3  | -2.4 |
| <i>CD2AP</i>    | CD2 associated protein                                    | 203593_at   | -1.918 | 0.001 | 363  | 175  | -2.1 | 1.3  | -1.0 |
| <i>TMEM19</i>   | transmembrane protein 19                                  | 229126_at   | -1.915 | 0.001 | 469  | 292  | -1.6 | -1.2 | 1.1  |
| <i>AHR</i>      | aryl hydrocarbon receptor                                 | 202820_at   | -1.913 | 0.001 | 1341 | 743  | -1.8 | 1.1  | 2.0  |
| <i>APCDD1</i>   | APC down-regulated 1                                      | 225016_at   | -1.912 | 0.001 | 2294 | 1201 | -1.9 | -2.1 | -2.4 |
| <i>PRRC1</i>    | proline rich coiled-coil 1                                | 224643_at   | -1.911 | 0.001 | 885  | 585  | -1.5 | -1.1 | 1.0  |
| <i>JAG1</i>     | jagged canonical Notch ligand 1                           | 216268_s_at | -1.909 | 0.001 | 1901 | 1091 | -1.7 | -1.1 | -2.0 |
| <i>GID4</i>     | GID complex subunit 4 homolog                             | 228452_at   | -1.908 | 0.001 | 275  | 163  | -1.7 | -1.5 | -1.5 |
| <i>ARL5B</i>    | ADP ribosylation factor like GTPase 5B                    | 226345_at   | -1.906 | 0.001 | 503  | 261  | -1.9 | 1.2  | 2.7  |
| <i>MAN1A1</i>   | mannosidase alpha class 1A member 1                       | 221760_at   | -1.906 | 0.001 | 644  | 329  | -2.0 | -1.0 | 1.2  |
| <i>KLF5</i>     | Kruppel like factor 5                                     | 209212_s_at | -1.905 | 0.001 | 686  | 275  | -2.5 | -2.2 | 1.3  |
| <i>WFDC5</i>    | WAP four-disulfide core domain 5                          | 242204_at   | -1.903 | 0.001 | 873  | 371  | -2.4 | -1.9 | 1.0  |
| <i>STON2</i>    | stonin 2                                                  | 227461_at   | -1.903 | 0.001 | 277  | 123  | -2.3 | 1.1  | 1.3  |
| <i>EBLN3P</i>   | endogenous Bornavirus like nucleoprotein 3, pseudogene    | 226635_at   | -1.902 | 0.001 | 513  | 325  | -1.6 | 1.1  | 1.0  |
| <i>SOWAHC</i>   | so sondowah ankyrin repeat domain family member C         | 227034_at   | -1.899 | 0.001 | 964  | 465  | -2.1 | -1.1 | 1.8  |
| <i>EPS8L2</i>   | EPS8 like 2                                               | 218180_s_at | -1.899 | 0.001 | 400  | 193  | -2.1 | -1.1 | -2.3 |
| <i>SERPINB5</i> | serpin family B member 5                                  | 204855_at   | -1.897 | 0.001 | 3069 | 1324 | -2.3 | -1.2 | 1.1  |
| <i>MED13L</i>   | mediator complex subunit 13L                              | 212209_at   | -1.896 | 0.001 | 535  | 354  | -1.5 | -1.3 | -1.5 |
| <i>ELK4</i>     | ETS transcription factor ELK4                             | 225159_s_at | -1.896 | 0.001 | 502  | 321  | -1.6 | -1.0 | 1.0  |
| <i>SYNCRIP</i>  | synaptotagmin binding cytoplasmic RNA interacting protein | 217833_at   | -1.894 | 0.001 | 707  | 451  | -1.6 | -1.6 | 1.2  |
| <i>PBX1</i>     | PBX homeobox 1                                            | 212151_at   | -1.893 | 0.001 | 563  | 366  | -1.5 | -1.3 | -1.4 |

|                 |                                                                                  |             |        |       |      |      |      |      |      |
|-----------------|----------------------------------------------------------------------------------|-------------|--------|-------|------|------|------|------|------|
| <i>CAPZA2</i>   | capping actin protein of muscle Z-line subunit alpha 2                           | 201237_at   | -1.893 | 0.001 | 488  | 289  | -1.7 | 1.8  | -1.2 |
| <i>MFAP3L</i>   | microfibril associated protein 3 like                                            | 205442_at   | -1.892 | 0.001 | 609  | 272  | -2.2 | -2.2 | -1.5 |
| <i>MXD1</i>     | MAX dimerization protein 1                                                       | 226275_at   | -1.891 | 0.001 | 321  | 166  | -1.9 | 1.3  | -1.3 |
| <i>CRLF3</i>    | cytokine receptor like factor 3                                                  | 205474_at   | -1.890 | 0.001 | 588  | 385  | -1.5 | 1.4  | 1.5  |
| <i>ELL2</i>     | elongation factor for RNA polymerase II 2                                        | 226099_at   | -1.888 | 0.001 | 628  | 303  | -2.1 | 1.8  | 1.8  |
| <i>SLC31A2</i>  | solute carrier family 31 member 2                                                | 204204_at   | -1.888 | 0.001 | 710  | 378  | -1.9 | -1.0 | -1.0 |
| <i>KIAA1109</i> | KIAA1109                                                                         | 212779_at   | -1.888 | 0.001 | 464  | 299  | -1.6 | 1.0  | -2.4 |
| <i>KIAA1671</i> | KIAA1671                                                                         | 225525_at   | -1.887 | 0.001 | 592  | 322  | -1.8 | -1.7 | 1.5  |
| <i>PTGS1</i>    | prostaglandin-endoperoxide synthase 1                                            | 215813_s_at | -1.884 | 0.001 | 564  | 288  | -2.0 | -1.9 | 1.2  |
| <i>SS18</i>     | SS18 subunit of BAF chromatin remodeling complex                                 | 202817_s_at | -1.884 | 0.001 | 341  | 187  | -1.8 | 1.5  | -1.2 |
| <i>MUC15</i>    | mucin 15, cell surface associated                                                | 227238_at   | -1.882 | 0.001 | 535  | 127  | -4.2 | 1.1  | 1.2  |
| <i>BEX2</i>     | brain expressed X-linked 2                                                       | 224367_at   | -1.881 | 0.001 | 399  | 209  | -1.9 | -1.2 | 1.1  |
| <i>DSC1</i>     | desmocollin 1                                                                    | 207324_s_at | -1.879 | 0.001 | 3878 | 1129 | -3.4 | -1.3 | 1.1  |
| <i>TNFSF10</i>  | TNF superfamily member 10                                                        | 202688_at   | -1.878 | 0.001 | 1473 | 774  | -1.9 | 1.7  | -1.0 |
| <i>LRRC40</i>   | leucine rich repeat containing 40                                                | 218577_at   | -1.878 | 0.001 | 421  | 225  | -1.9 | 2.0  | 1.5  |
| <i>DSG3</i>     | desmoglein 3                                                                     | 235075_at   | -1.877 | 0.001 | 945  | 403  | -2.3 | 1.2  | -1.2 |
| <i>ZNF750</i>   | zinc finger protein 750                                                          | 219995_s_at | -1.876 | 0.001 | 805  | 276  | -2.9 | -1.3 | -1.0 |
| <i>PIK3C2A</i>  | phosphatidylinositol-4-phosphate 3-kinase catalytic subunit type 2 alpha         | 213070_at   | -1.876 | 0.001 | 599  | 371  | -1.6 | 1.1  | -1.5 |
| <i>TMEM79</i>   | transmembrane protein 79                                                         | 223544_at   | -1.875 | 0.001 | 665  | 289  | -2.3 | -1.1 | 1.1  |
| <i>APPL2</i>    | adaptor protein, phosphotyrosine interacting with PH domain and leucine zipper 2 | 218218_at   | -1.874 | 0.001 | 439  | 229  | -1.9 | -1.1 | 1.2  |
| <i>WDR36</i>    | WD repeat domain 36                                                              | 226180_at   | -1.872 | 0.001 | 320  | 150  | -2.1 | -1.1 | 2.1  |
| <i>ZDHHC9</i>   | zinc finger DHHC-type containing 9                                               | 222451_s_at | -1.872 | 0.001 | 491  | 305  | -1.6 | -1.2 | -1.2 |
| <i>CEBPA</i>    | CCAAT enhancer binding protein alpha                                             | 204039_at   | -1.870 | 0.001 | 914  | 495  | -1.8 | -1.5 | -1.1 |
| <i>ID2</i>      | inhibitor of DNA binding 2                                                       | 201565_s_at | -1.869 | 0.001 | 1119 | 745  | -1.5 | 1.2  | -2.7 |
| <i>PIIP5K2</i>  | diphosphoinositol pentakisphosphate kinase 2                                     | 203253_s_at | -1.869 | 0.001 | 412  | 214  | -1.9 | 1.9  | -1.6 |
| <i>ZNF431</i>   | zinc finger protein 431                                                          | 232338_at   | -1.869 | 0.001 | 302  | 122  | -2.5 | 2.2  | 1.4  |
| <i>OVOL1</i>    | ovo like transcriptional repressor 1                                             | 229396_at   | -1.868 | 0.001 | 701  | 346  | -2.0 | -1.5 | -1.1 |

|                 |                                                          |             |        |       |      |     |      |      |      |
|-----------------|----------------------------------------------------------|-------------|--------|-------|------|-----|------|------|------|
| <i>FERMT1</i>   | fermitin family member 1                                 | 60474_at    | -1.868 | 0.001 | 335  | 166 | -2.0 | -1.4 | -1.0 |
| <i>DHX29</i>    | DEH-box helicase 29                                      | 212648_at   | -1.867 | 0.001 | 515  | 338 | -1.5 | 1.5  | -1.2 |
| <i>ALDH3B2</i>  | aldehyde dehydrogenase 3 family member B2                | 204942_s_at | -1.867 | 0.001 | 1352 | 391 | -3.5 | -1.0 | 1.1  |
| <i>DAAM1</i>    | dishevelled associated activator of morphogenesis 1      | 216060_s_at | -1.866 | 0.001 | 570  | 278 | -2.1 | -1.3 | -1.2 |
| <i>PPP2CA</i>   | protein phosphatase 2 catalytic subunit alpha            | 238719_at   | -1.865 | 0.001 | 263  | 142 | -1.8 | -1.2 | -1.1 |
| <i>TINCR</i>    | TINCR ubiquitin domain containing                        | 229385_s_at | -1.865 | 0.001 | 464  | 155 | -3.0 | -2.2 | -1.1 |
| <i>ARL4A</i>    | ADP ribosylation factor like GTPase 4A                   | 205020_s_at | -1.864 | 0.001 | 800  | 505 | -1.6 | -1.0 | 2.0  |
| <i>MCC</i>      | MCC regulator of WNT signaling pathway                   | 226225_at   | -1.862 | 0.001 | 476  | 225 | -2.1 | -1.7 | -2.8 |
| <i>MIER1</i>    | MIER1 transcriptional regulator                          | 225475_at   | -1.862 | 0.001 | 344  | 205 | -1.7 | 1.8  | -1.1 |
| <i>EPHB6</i>    | EPH receptor B6                                          | 204718_at   | -1.860 | 0.001 | 511  | 178 | -2.9 | -2.1 | -1.2 |
| <i>BICD2</i>    | BICD cargo adaptor 2                                     | 213154_s_at | -1.857 | 0.001 | 1183 | 668 | -1.8 | -1.1 | -1.2 |
| <i>CLIC3</i>    | chloride intracellular channel 3                         | 219529_at   | -1.856 | 0.001 | 632  | 218 | -2.9 | -1.0 | 1.1  |
| <i>VSNL1</i>    | visinin like 1                                           | 203797_at   | -1.854 | 0.001 | 570  | 241 | -2.4 | 1.1  | 1.1  |
| <i>KDSR</i>     | 3-ketodihydrosphingosine reductase                       | 229850_at   | -1.854 | 0.001 | 344  | 195 | -1.8 | -1.5 | -2.2 |
| <i>SERBP1</i>   | SERPINE1 mRNA binding protein 1                          | 227369_at   | -1.851 | 0.001 | 477  | 252 | -1.9 | -1.2 | 2.4  |
| <i>CCND2</i>    | cyclin D2                                                | 200953_s_at | -1.851 | 0.001 | 950  | 486 | -2.0 | -1.5 | -1.1 |
| <i>SPTSSA</i>   | serine palmitoyltransferase small subunit A              | 213508_at   | -1.850 | 0.001 | 759  | 485 | -1.6 | -1.3 | -1.8 |
| <i>ACAP2</i>    | ArfGAP with coiled-coil, ankyrin repeat and PH domains 2 | 212476_at   | -1.850 | 0.001 | 550  | 357 | -1.5 | 1.1  | -1.2 |
| <i>FGL2</i>     | fibrinogen like 2                                        | 227265_at   | -1.850 | 0.001 | 1393 | 655 | -2.1 | 1.7  | 1.1  |
| <i>KITLG</i>    | KIT ligand                                               | 226534_at   | -1.849 | 0.001 | 557  | 286 | -1.9 | 1.2  | 5.0  |
| <i>REEP3</i>    | receptor accessory protein 3                             | 225785_at   | -1.849 | 0.001 | 472  | 300 | -1.6 | 1.2  | 1.9  |
| <i>SOX7</i>     | SRY-box 7                                                | 228698_at   | -1.849 | 0.001 | 760  | 328 | -2.3 | 1.1  | 1.2  |
| <i>C1orf116</i> | chromosome 1 open reading frame 116                      | 219476_at   | -1.848 | 0.001 | 523  | 196 | -2.7 | -1.5 | 1.1  |
| <i>BNIP1</i>    | BCL2 interacting protein like                            | 236534_at   | -1.848 | 0.001 | 479  | 163 | -2.9 | -1.3 | 1.0  |
| <i>SPTBN2</i>   | spectrin beta, non-erythrocytic 2                        | 231311_at   | -1.846 | 0.001 | 409  | 147 | -2.8 | -2.0 | 1.0  |
| <i>UBLCP1</i>   | ubiquitin like domain containing CTD phosphatase 1       | 227413_at   | -1.845 | 0.001 | 558  | 315 | -1.8 | 1.9  | 1.1  |



|                 |                                                       |              |        |       |      |      |      |      |      |
|-----------------|-------------------------------------------------------|--------------|--------|-------|------|------|------|------|------|
| <i>HLA-DQB2</i> | major histocompatibility complex, class II, DQ beta 2 | 215536_at    | -1.844 | 0.001 | 614  | 249  | -2.5 | -1.6 | -1.6 |
| <i>CBR4</i>     | carbonyl reductase 4                                  | 213626_at    | -1.844 | 0.001 | 277  | 146  | -1.9 | -1.4 | -2.9 |
| <i>SOX9</i>     | SRY-box 9                                             | 202935_s_at  | -1.842 | 0.001 | 978  | 318  | -3.1 | -1.9 | -1.1 |
| <i>DOCK9</i>    | dedicator of cytokinesis 9                            | 212538_at    | -1.842 | 0.001 | 847  | 435  | -1.9 | 1.3  | -1.1 |
| <i>GPR87</i>    | G protein-coupled receptor 87                         | 219936_s_at  | -1.841 | 0.001 | 499  | 150  | -3.3 | 1.2  | -1.1 |
| <i>LMBRD2</i>   | LMBR1 domain containing 2                             | 226779_at    | -1.841 | 0.001 | 453  | 230  | -2.0 | 1.4  | 1.0  |
| <i>PRPS2</i>    | phosphoribosyl pyrophosphate synthetase 2             | 230352_at    | -1.841 | 0.001 | 394  | 222  | -1.8 | 1.0  | 1.0  |
| <i>SORD</i>     | sorbitol dehydrogenase                                | 201563_at    | -1.839 | 0.001 | 823  | 371  | -2.2 | -1.2 | -1.3 |
| <i>ZHX1</i>     | zinc fingers and homeoboxes 1                         | 223214_s_at  | -1.838 | 0.001 | 331  | 154  | -2.2 | 1.3  | -2.4 |
| <i>GALNT1</i>   | polypeptide N-acetylgalactosaminyltransferase 1       | 201724_s_at  | -1.837 | 0.001 | 623  | 364  | -1.7 | 1.2  | -1.6 |
| <i>MOSPD1</i>   | motile sperm domain containing 1                      | 1557455_s_at | -1.837 | 0.001 | 331  | 198  | -1.7 | 1.2  | ND   |
| <i>LYSMD3</i>   | LysM domain containing 3                              | 226321_at    | -1.833 | 0.001 | 255  | 117  | -2.2 | 1.3  | 1.0  |
| <i>PDZK1IP1</i> | PDZK1 interacting protein 1                           | 219630_at    | -1.832 | 0.001 | 685  | 323  | -2.1 | 1.2  | 1.1  |
| <i>ASF1A</i>    | anti-silencing function 1A histone chaperone          | 203427_at    | -1.831 | 0.001 | 333  | 164  | -2.0 | -1.1 | -1.2 |
| <i>CALML5</i>   | calmodulin like 5                                     | 220414_at    | -1.830 | 0.001 | 4377 | 1908 | -2.3 | 1.4  | -1.1 |
| <i>KRT2</i>     | keratin 2                                             | 207908_at    | -1.829 | 0.001 | 5680 | 2068 | -2.7 | -2.1 | -1.1 |
| <i>ACER1</i>    | alkaline ceramidase 1                                 | 1553929_at   | -1.829 | 0.001 | 381  | 142  | -2.7 | -1.3 | ND   |
| <i>PIAS1</i>    | protein inhibitor of activated STAT 1                 | 217862_at    | -1.828 | 0.001 | 516  | 340  | -1.5 | 1.1  | -1.9 |
| <i>FBXO45</i>   | F-box protein 45                                      | 225099_at    | -1.826 | 0.001 | 708  | 372  | -1.9 | 1.9  | 1.5  |
| <i>IL1RN</i>    | interleukin 1 receptor antagonist                     | 212657_s_at  | -1.825 | 0.001 | 1035 | 620  | -1.7 | -1.1 | 1.3  |
| <i>MAP7</i>     | microtubule associated protein 7                      | 202890_at    | -1.824 | 0.001 | 454  | 179  | -2.5 | 1.1  | 1.0  |
| <i>ABCA12</i>   | ATP binding cassette subfamily A member 12            | 215465_at    | -1.823 | 0.001 | 528  | 153  | -3.5 | 1.3  | -1.0 |
| <i>USP31</i>    | ubiquitin specific peptidase 31                       | 226035_at    | -1.821 | 0.001 | 621  | 396  | -1.6 | -1.1 | 1.4  |
| <i>TRPS1</i>    | transcriptional repressor GATA binding 1              | 222651_s_at  | -1.816 | 0.001 | 642  | 389  | -1.7 | 1.2  | 1.3  |
| <i>ATL2</i>     | atlastin GTPase 2                                     | 222700_at    | -1.815 | 0.001 | 930  | 516  | -1.8 | 1.6  | 2.5  |
| <i>CERS3</i>    | ceramide synthase 3                                   | 1554252_a_at | -1.814 | 0.001 | 407  | 140  | -2.9 | -1.4 | ND   |
| <i>MIB1</i>     | mindbomb E3 ubiquitin protein ligase 1                | 224720_at    | -1.811 | 0.001 | 444  | 227  | -2.0 | 1.1  | -1.1 |
| <i>JMJD1C</i>   | jumonji domain containing 1C                          | 221763_at    | -1.810 | 0.001 | 487  | 307  | -1.6 | 1.2  | 1.5  |

|                |                                                    |             |        |       |      |      |      |      |      |
|----------------|----------------------------------------------------|-------------|--------|-------|------|------|------|------|------|
| <i>ZNF644</i>  | zinc finger protein 644                            | 222580_at   | -1.810 | 0.001 | 436  | 288  | -1.5 | 1.3  | -1.1 |
| <i>BTBD11</i>  | BTB domain containing 11                           | 228570_at   | -1.809 | 0.001 | 248  | 110  | -2.3 | -1.4 | 1.2  |
| <i>AEBP2</i>   | AE binding protein 2                               | 225889_at   | -1.809 | 0.001 | 486  | 237  | -2.0 | 1.1  | 1.2  |
| <i>AFDN</i>    | afadin, adherens junction formation factor         | 224685_at   | -1.808 | 0.001 | 848  | 505  | -1.7 | 1.1  | 2.0  |
| <i>FAM110C</i> | family with sequence similarity 110 member C       | 226863_at   | -1.806 | 0.001 | 316  | 100  | -3.2 | 1.4  | -1.3 |
| <i>CNIH1</i>   | cornichon family AMPA receptor auxiliary protein 1 | 225553_at   | -1.804 | 0.001 | 556  | 370  | -1.5 | -1.5 | 1.1  |
| <i>CHP2</i>    | calcineurin like EF-hand protein 2                 | 206149_at   | -1.802 | 0.001 | 320  | 112  | -2.9 | -4.5 | -1.1 |
| <i>STAM2</i>   | signal transducing adaptor molecule 2              | 209649_at   | -1.802 | 0.001 | 345  | 190  | -1.8 | 1.4  | 1.2  |
| <i>SGPL1</i>   | sphingosine-1-phosphate lyase 1                    | 212321_at   | -1.801 | 0.001 | 468  | 298  | -1.6 | -1.4 | -1.6 |
| <i>PPP4R3A</i> | protein phosphatase 4 regulatory subunit 3A        | 220368_s_at | -1.800 | 0.001 | 399  | 255  | -1.6 | 1.1  | 1.0  |
| <i>CDKN2B</i>  | cyclin dependent kinase inhibitor 2B               | 236313_at   | -1.800 | 0.001 | 442  | 134  | -3.3 | 1.6  | 1.9  |
| <i>CD24</i>    | CD24 molecule                                      | 209771_x_at | -1.799 | 0.001 | 2616 | 1295 | -2.0 | 2.0  | -1.0 |
| <i>IFFO2</i>   | intermediate filament family orphan 2              | 225615_at   | -1.798 | 0.001 | 895  | 489  | -1.8 | -1.5 | 1.9  |
| <i>CDK7</i>    | cyclin dependent kinase 7                          | 211297_s_at | -1.797 | 0.001 | 375  | 244  | -1.5 | 1.4  | 1.5  |
| <i>NDFIP1</i>  | Nedd4 family interacting protein 1                 | 222423_at   | -1.797 | 0.001 | 634  | 421  | -1.5 | -1.1 | -2.8 |
| <i>FAM83B</i>  | family with sequence similarity 83 member B        | 232202_at   | -1.797 | 0.001 | 599  | 205  | -2.9 | -1.5 | 1.1  |
| <i>EPHX3</i>   | epoxide hydrolase 3                                | 220013_at   | -1.795 | 0.001 | 611  | 261  | -2.3 | -1.1 | -1.2 |
| <i>LYRM7</i>   | LYR motif containing 7                             | 228841_at   | -1.794 | 0.001 | 412  | 234  | -1.8 | -1.1 | -1.3 |
| <i>NFAT5</i>   | nuclear factor of activated T cells 5              | 224984_at   | -1.792 | 0.001 | 1001 | 618  | -1.6 | -1.2 | 1.1  |
| <i>ZRANB1</i>  | zinc finger RANBP2-type containing 1               | 225138_at   | -1.792 | 0.001 | 312  | 190  | -1.6 | -1.1 | -2.3 |
| <i>LAMP2</i>   | lysosomal associated membrane protein 2            | 226671_at   | -1.792 | 0.001 | 396  | 208  | -1.9 | -1.8 | -2.5 |
| <i>DDI2</i>    | DNA damage inducible 1 homolog 2                   | 225780_at   | -1.791 | 0.001 | 445  | 272  | -1.6 | 1.2  | -1.4 |
| <i>YAP1</i>    | Yes associated protein 1                           | 224894_at   | -1.788 | 0.001 | 1058 | 686  | -1.5 | -1.1 | 1.6  |
| <i>DENND2C</i> | DENN domain containing 2C                          | 230769_at   | -1.788 | 0.001 | 279  | 110  | -2.5 | -1.1 | -1.0 |
| <i>AKAP11</i>  | A-kinase anchoring protein 11                      | 203156_at   | -1.787 | 0.001 | 693  | 434  | -1.6 | 1.1  | -1.2 |
| <i>UEVLD</i>   | UEV and lactate/malate dehydrogenase domains       | 220775_s_at | -1.787 | 0.001 | 249  | 145  | -1.7 | -1.0 | -1.5 |

|                 |                                                               |             |        |       |      |      |      |      |      |
|-----------------|---------------------------------------------------------------|-------------|--------|-------|------|------|------|------|------|
| <i>MOB3B</i>    | MOB kinase activator 3B                                       | 226844_at   | -1.786 | 0.001 | 279  | 168  | -1.7 | -2.2 | -4.4 |
| <i>ELOVL4</i>   | ELOVL fatty acid elongase 4                                   | 219532_at   | -1.785 | 0.001 | 788  | 153  | -5.2 | 1.4  | -1.0 |
| <i>UCHL3</i>    | ubiquitin C-terminal hydrolase L3                             | 204616_at   | -1.785 | 0.001 | 1328 | 783  | -1.7 | 1.5  | -1.1 |
| <i>SLC18B1</i>  | solute carrier family 18 member B1                            | 226301_at   | -1.784 | 0.001 | 802  | 291  | -2.8 | 1.5  | -9.1 |
| <i>CTNNBIP1</i> | catenin beta interacting protein 1                            | 203081_at   | -1.784 | 0.001 | 747  | 478  | -1.6 | -1.8 | 1.1  |
| <i>SPAG9</i>    | sperm associated antigen 9                                    | 225339_at   | -1.782 | 0.001 | 597  | 387  | -1.5 | -1.3 | -1.8 |
| <i>DICER1</i>   | dicer 1, ribonuclease III                                     | 212888_at   | -1.782 | 0.001 | 646  | 401  | -1.6 | 1.1  | -1.3 |
| <i>PPP1R13L</i> | protein phosphatase 1 regulatory subunit 13 like              | 218849_s_at | -1.782 | 0.001 | 370  | 180  | -2.1 | -1.8 | 1.2  |
| <i>PPIC</i>     | peptidylprolyl isomerase C                                    | 204517_at   | -1.780 | 0.001 | 895  | 565  | -1.6 | 1.4  | 2.8  |
| <i>EMB</i>      | embigin                                                       | 226789_at   | -1.779 | 0.001 | 812  | 440  | -1.8 | -1.2 | 2.8  |
| <i>B3GNT5</i>   | UDP-GlcNAc:betaGal beta-1,3-N-acetylglucosaminyltransferase 5 | 225612_s_at | -1.778 | 0.001 | 454  | 198  | -2.3 | 1.7  | 3.0  |
| <i>BAZ2B</i>    | bromodomain adjacent to zinc finger domain 2B                 | 203080_s_at | -1.778 | 0.001 | 549  | 344  | -1.6 | 1.5  | -2.4 |
| <i>ZNF121</i>   | zinc finger protein 121                                       | 1553979_at  | -1.777 | 0.001 | 623  | 410  | -1.5 | 1.2  | ND   |
| <i>DYNLT3</i>   | dynein light chain Tctex-type 3                               | 203303_at   | -1.774 | 0.001 | 1096 | 706  | -1.6 | 1.5  | 1.6  |
| <i>LAMTOR3</i>  | late endosomal/lysosomal adaptor, MAPK and MTOR activator 3   | 217971_at   | -1.773 | 0.001 | 692  | 451  | -1.5 | 1.4  | -1.9 |
| <i>PDZD8</i>    | PDZ domain containing 8                                       | 213549_at   | -1.772 | 0.001 | 275  | 150  | -1.8 | -1.3 | -1.0 |
| <i>GULP1</i>    | GULP PTB domain containing engulfment adaptor 1               | 204237_at   | -1.768 | 0.001 | 492  | 234  | -2.1 | -1.0 | 3.1  |
| <i>KIF1B</i>    | kinesin family member 1B                                      | 226968_at   | -1.767 | 0.001 | 486  | 294  | -1.7 | 1.2  | 2.2  |
| <i>PPP4R3B</i>  | protein phosphatase 4 regulatory subunit 3B                   | 233759_s_at | -1.766 | 0.001 | 561  | 372  | -1.5 | 1.2  | 1.0  |
| <i>CCDC126</i>  | coiled-coil domain containing 126                             | 228087_at   | -1.766 | 0.001 | 220  | 115  | -1.9 | 1.1  | 1.6  |
| <i>MYO6</i>     | myosin VI                                                     | 203216_s_at | -1.765 | 0.001 | 511  | 221  | -2.3 | 1.4  | -1.8 |
| <i>CCNC</i>     | cyclin C                                                      | 201955_at   | -1.765 | 0.001 | 1156 | 726  | -1.6 | 1.4  | 1.9  |
| <i>TGFBR3</i>   | transforming growth factor beta receptor 3                    | 226625_at   | -1.765 | 0.001 | 674  | 406  | -1.7 | -1.6 | -1.7 |
| <i>TTC39C</i>   | tetratricopeptide repeat domain 39C                           | 238480_at   | -1.764 | 0.001 | 270  | 149  | -1.8 | -1.1 | 1.9  |
| <i>SFN</i>      | stratifin                                                     | 209260_at   | -1.763 | 0.001 | 1788 | 1033 | -1.7 | -1.4 | 1.1  |
| <i>EFNA3</i>    | ephrin A3                                                     | 210132_at   | -1.762 | 0.001 | 472  | 306  | -1.5 | -1.3 | 1.1  |

|                 |                                                    |              |        |       |      |     |      |      |      |
|-----------------|----------------------------------------------------|--------------|--------|-------|------|-----|------|------|------|
| <i>DNAJB14</i>  | DnaJ heat shock protein family (Hsp40) member B14  | 226399_at    | -1.757 | 0.001 | 360  | 220 | -1.6 | 1.4  | -1.7 |
| <i>CYP2R1</i>   | cytochrome P450 family 2 subfamily R member 1      | 227109_at    | -1.757 | 0.001 | 326  | 175 | -1.9 | 1.2  | 1.0  |
| <i>MBTD1</i>    | mbt domain containing 1                            | 226797_at    | -1.756 | 0.001 | 366  | 183 | -2.0 | 1.0  | -1.0 |
| <i>SLC35F5</i>  | solute carrier family 35 member F5                 | 225872_at    | -1.756 | 0.001 | 560  | 316 | -1.8 | 1.6  | -1.3 |
| <i>RNF6</i>     | ring finger protein 6                              | 203403_s_at  | -1.754 | 0.001 | 768  | 464 | -1.7 | 1.6  | -2.1 |
| <i>RAB11A</i>   | RAB11A, member RAS oncogene family                 | 200864_s_at  | -1.753 | 0.001 | 654  | 413 | -1.6 | -1.1 | -1.6 |
| <i>C5orf46</i>  | chromosome 5 open reading frame 46                 | 1554195_a_at | -1.752 | 0.001 | 1007 | 264 | -3.8 | -1.8 | ND   |
| <i>SRPK1</i>    | SRSF protein kinase 1                              | 202200_s_at  | -1.752 | 0.001 | 855  | 475 | -1.8 | 1.3  | 1.6  |
| <i>CRABP2</i>   | cellular retinoic acid binding protein 2           | 202575_at    | -1.752 | 0.001 | 1562 | 779 | -2.0 | 1.3  | -1.1 |
| <i>PRSS8</i>    | serine protease 8                                  | 202525_at    | -1.751 | 0.001 | 440  | 156 | -2.8 | -1.2 | 1.2  |
| <i>KRT15</i>    | keratin 15                                         | 204734_at    | -1.750 | 0.001 | 2526 | 410 | -6.2 | -3.4 | 2.1  |
| <i>ATP6V1C2</i> | ATPase H+ transporting V1 subunit C2               | 1552532_a_at | -1.750 | 0.001 | 400  | 84  | -4.7 | 2.2  | ND   |
| <i>GOLGA4</i>   | golgin A4                                          | 201567_s_at  | -1.749 | 0.001 | 1059 | 662 | -1.6 | 1.7  | 1.1  |
| <i>ANK3</i>     | ankyrin 3                                          | 206385_s_at  | -1.748 | 0.001 | 543  | 185 | -2.9 | -1.4 | 5.5  |
| <i>CCL27</i>    | C-C motif chemokine ligand 27                      | 207955_at    | -1.747 | 0.001 | 327  | 68  | -4.8 | -3.8 | -1.1 |
| <i>PTPN11</i>   | protein tyrosine phosphatase non-receptor type 11  | 209896_s_at  | -1.746 | 0.001 | 482  | 293 | -1.6 | -1.0 | -1.3 |
| <i>CRYBG3</i>   | crystallin beta-gamma domain containing 3          | 214030_at    | -1.745 | 0.001 | 441  | 259 | -1.7 | -1.1 | -1.1 |
| <i>SERPINB7</i> | serpin family B member 7                           | 206421_s_at  | -1.744 | 0.001 | 1270 | 443 | -2.9 | -1.0 | 1.1  |
| <i>PPA2</i>     | pyrophosphatase (inorganic) 2                      | 1559496_at   | -1.743 | 0.001 | 353  | 147 | -2.4 | 1.4  | ND   |
| <i>SNAI2</i>    | snail family transcriptional repressor 2           | 213139_at    | -1.742 | 0.001 | 1427 | 855 | -1.7 | -1.8 | -5.7 |
| <i>EEF1A1</i>   | eukaryotic translation elongation factor 1 alpha 1 | 227708_at    | -1.739 | 0.001 | 630  | 390 | -1.6 | -1.9 | -1.2 |
| <i>SLC16A7</i>  | solute carrier family 16 member 7                  | 207057_at    | -1.738 | 0.001 | 558  | 282 | -2.0 | 1.0  | -2.2 |
| <i>ZNF185</i>   | zinc finger protein 185 with LIM domain            | 203585_at    | -1.737 | 0.001 | 493  | 262 | -1.9 | -1.4 | -1.2 |
| <i>COX11</i>    | cytochrome c oxidase copper chaperone COX11        | 211727_s_at  | -1.737 | 0.001 | 884  | 581 | -1.5 | 1.0  | 1.7  |
| <i>HACD2</i>    | 3-hydroxyacyl-CoA dehydratase 2                    | 212640_at    | -1.737 | 0.001 | 780  | 403 | -1.9 | -1.1 | 1.1  |
| <i>ARHGEF37</i> | Rho guanine nucleotide exchange factor 37          | 227717_at    | -1.737 | 0.001 | 483  | 189 | -2.6 | -2.7 | -3.9 |

|                 |                                                                                 |             |        |       |      |      |      |      |      |
|-----------------|---------------------------------------------------------------------------------|-------------|--------|-------|------|------|------|------|------|
| <i>SMPDL3A</i>  | sphingomyelin phosphodiesterase acid like 3A                                    | 213624_at   | -1.736 | 0.001 | 950  | 481  | -2.0 | -1.3 | -3.6 |
| <i>C11orf54</i> | chromosome 11 open reading frame 54                                             | 229851_s_at | -1.734 | 0.001 | 341  | 198  | -1.7 | 1.3  | 1.2  |
| <i>TSTD1</i>    | thiosulfate sulfurtransferase like domain containing 1                          | 226482_s_at | -1.733 | 0.001 | 634  | 287  | -2.2 | 1.0  | -2.6 |
| <i>CITED2</i>   | Cbp/p300 interacting transactivator with Glu/Asp rich carboxy-terminal domain 2 | 209357_at   | -1.733 | 0.001 | 638  | 334  | -1.9 | -1.4 | 1.1  |
| <i>STK26</i>    | serine/threonine kinase 26                                                      | 218499_at   | -1.733 | 0.001 | 289  | 108  | -2.7 | -1.8 | 2.3  |
| <i>HSPB1</i>    | heat shock protein family B (small) member 1                                    | 201841_s_at | -1.733 | 0.001 | 6475 | 4217 | -1.5 | -1.1 | -1.8 |
| <i>PHAX</i>     | phosphorylated adaptor for RNA export                                           | 235767_x_at | -1.732 | 0.001 | 316  | 195  | -1.6 | 1.1  | -1.5 |
| <i>FAM214A</i>  | family with sequence similarity 214 member A                                    | 225327_at   | -1.730 | 0.001 | 472  | 277  | -1.7 | 1.2  | -2.8 |
| <i>C19orf33</i> | chromosome 19 open reading frame 33                                             | 223631_s_at | -1.729 | 0.001 | 1005 | 288  | -3.5 | -1.2 | -1.0 |
| <i>PPM1A</i>    | protein phosphatase, Mg2+/Mn2+ dependent 1A                                     | 227728_at   | -1.729 | 0.001 | 352  | 196  | -1.8 | -1.2 | -1.4 |
| <i>SLC40A1</i>  | solute carrier family 40 member 1                                               | 223044_at   | -1.728 | 0.001 | 1546 | 806  | -1.9 | 1.9  | -1.4 |
| <i>PSORS1C2</i> | psoriasis susceptibility 1 candidate 2                                          | 220635_at   | -1.727 | 0.001 | 661  | 299  | -2.2 | -1.7 | 1.1  |
| <i>ZC3H12C</i>  | zinc finger CCCH-type containing 12C                                            | 231899_at   | -1.727 | 0.001 | 359  | 210  | -1.7 | -1.0 | 1.2  |
| <i>GRHL3</i>    | grainyhead like transcription factor 3                                          | 232116_at   | -1.726 | 0.001 | 379  | 158  | -2.4 | -1.1 | 1.2  |
| <i>TPPP3</i>    | tubulin polymerization promoting protein family member 3                        | 218876_at   | -1.725 | 0.001 | 312  | 145  | -2.1 | -3.1 | -1.2 |
| <i>ATF1</i>     | activating transcription factor 1                                               | 222103_at   | -1.725 | 0.001 | 402  | 258  | -1.6 | 1.1  | -1.2 |
| <i>PALLD</i>    | palladin, cytoskeletal associated protein                                       | 200907_s_at | -1.724 | 0.001 | 1412 | 823  | -1.7 | 1.7  | 3.1  |
| <i>RELCH</i>    | RAB11 binding and LisH domain, coiled-coil and HEAT repeat containing           | 225508_at   | -1.724 | 0.001 | 396  | 223  | -1.8 | 1.4  | -1.5 |
| <i>PELI1</i>    | pellino E3 ubiquitin protein ligase 1                                           | 218319_at   | -1.723 | 0.001 | 651  | 404  | -1.6 | 1.2  | 1.0  |
| <i>NTRK2</i>    | neurotrophic receptor tyrosine kinase 2                                         | 221796_at   | -1.723 | 0.001 | 306  | 126  | -2.4 | -1.3 | -1.1 |
| <i>PKP3</i>     | plakophilin 3                                                                   | 209873_s_at | -1.720 | 0.001 | 1004 | 500  | -2.0 | -1.5 | 1.1  |
| <i>ANKRD13C</i> | ankyrin repeat domain 13C                                                       | 223418_x_at | -1.719 | 0.001 | 262  | 138  | -1.9 | 1.4  | 1.1  |
| <i>GGT6</i>     | gamma-glutamyltransferase 6                                                     | 236225_at   | -1.718 | 0.001 | 263  | 87   | -3.0 | -1.5 | -1.3 |
| <i>MYLK</i>     | myosin light chain kinase                                                       | 224823_at   | -1.717 | 0.001 | 1485 | 907  | -1.6 | 1.2  | 1.3  |
| <i>CALML3</i>   | calmodulin like 3                                                               | 210020_x_at | -1.717 | 0.001 | 2746 | 954  | -2.9 | 1.7  | 1.2  |

|                 |                                                                                      |             |        |       |      |      |      |      |      |
|-----------------|--------------------------------------------------------------------------------------|-------------|--------|-------|------|------|------|------|------|
| <i>TMEM154</i>  | transmembrane protein 154                                                            | 238063_at   | -1.716 | 0.001 | 478  | 198  | -2.4 | -1.2 | 1.8  |
| <i>ARAP2</i>    | ArfGAP with RhoGAP domain, ankyrin repeat and PH domain 2                            | 213618_at   | -1.716 | 0.001 | 458  | 181  | -2.5 | 1.5  | -1.2 |
| <i>CTSV</i>     | cathepsin V                                                                          | 210074_at   | -1.715 | 0.001 | 1867 | 580  | -3.2 | 1.0  | 1.3  |
| <i>TUBA4A</i>   | tubulin alpha 4a                                                                     | 212242_at   | -1.714 | 0.001 | 2062 | 1043 | -2.0 | -1.1 | 1.5  |
| <i>SREK1IP1</i> | SREK1 interacting protein 1                                                          | 235390_at   | -1.714 | 0.001 | 319  | 173  | -1.8 | 1.1  | 1.1  |
| <i>ZBTB21</i>   | zinc finger and BTB domain containing 21                                             | 225539_at   | -1.714 | 0.001 | 301  | 151  | -2.0 | -1.0 | -1.1 |
| <i>PSMC6</i>    | proteasome 26S subunit, ATPase 6                                                     | 201699_at   | -1.714 | 0.001 | 704  | 464  | -1.5 | 1.8  | 1.2  |
| <i>KLC3</i>     | kinesin light chain 3                                                                | 239853_at   | -1.714 | 0.001 | 439  | 184  | -2.4 | -2.0 | -1.2 |
| <i>ASAP3</i>    | ArfGAP with SH3 domain, ankyrin repeat and PH domain 3                               | 222236_s_at | -1.711 | 0.001 | 391  | 249  | -1.6 | -1.3 | -1.2 |
| <i>EPS8L1</i>   | EPS8 like 1                                                                          | 218779_x_at | -1.711 | 0.001 | 337  | 173  | -1.9 | -1.2 | -1.5 |
| <i>ACVR2A</i>   | activin A receptor type 2A                                                           | 228416_at   | -1.710 | 0.001 | 280  | 123  | -2.3 | -1.6 | 1.4  |
| <i>RDH13</i>    | retinol dehydrogenase 13                                                             | 225467_s_at | -1.710 | 0.001 | 459  | 269  | -1.7 | 1.0  | -1.2 |
| <i>MIR205HG</i> | MIR205 host gene                                                                     | 226755_at   | -1.710 | 0.001 | 277  | 120  | -2.3 | -1.1 | -1.1 |
| <i>SH3D19</i>   | SH3 domain containing 19                                                             | 225162_at   | -1.709 | 0.001 | 498  | 257  | -1.9 | -1.5 | -1.2 |
| <i>SGMS2</i>    | sphingomyelin synthase 2                                                             | 227038_at   | -1.709 | 0.001 | 185  | 81   | -2.3 | 1.3  | 2.2  |
| <i>ARG1</i>     | arginase 1                                                                           | 206177_s_at | -1.709 | 0.001 | 1807 | 746  | -2.4 | 2.0  | -1.1 |
| <i>SNHG19</i>   | small nucleolar RNA host gene 19                                                     | 228049_x_at | -1.709 | 0.001 | 655  | 397  | -1.6 | -1.8 | 1.3  |
| <i>HPGD</i>     | 15-hydroxyprostaglandin dehydrogenase                                                | 203914_x_at | -1.708 | 0.001 | 1126 | 481  | -2.3 | -1.8 | -5.5 |
| <i>C21orf91</i> | chromosome 21 open reading frame 91                                                  | 226109_at   | -1.708 | 0.001 | 1104 | 488  | -2.3 | 2.0  | -9.3 |
| <i>CMTM4</i>    | CKLF like MARVEL transmembrane domain containing 4                                   | 225009_at   | -1.708 | 0.001 | 696  | 444  | -1.6 | -1.2 | -1.7 |
| <i>SLC10A3</i>  | solute carrier family 10 member 3                                                    | 204928_s_at | -1.707 | 0.001 | 324  | 215  | -1.5 | -1.1 | 1.4  |
| <i>TOPORS</i>   | TOP1 binding arginine/serine rich protein                                            | 204071_s_at | -1.706 | 0.001 | 322  | 205  | -1.6 | 1.4  | -1.1 |
| <i>BDP1</i>     | B double prime 1, subunit of RNA polymerase III transcription initiation factor IIIB | 226290_at   | -1.706 | 0.001 | 349  | 188  | -1.9 | 1.2  | 1.2  |
| <i>SCYL2</i>    | SCY1 like pseudokinase 2                                                             | 224961_at   | -1.706 | 0.001 | 439  | 266  | -1.6 | 1.1  | -1.1 |
| <i>PTGER3</i>   | prostaglandin E receptor 3                                                           | 213933_at   | -1.704 | 0.001 | 442  | 171  | -2.6 | 1.3  | 1.0  |
| <i>HLF</i>      | HLF transcription factor, PAR bZIP family member                                     | 204753_s_at | -1.703 | 0.001 | 180  | 68   | -2.7 | -2.1 | -1.3 |
| <i>IL22RA1</i>  | interleukin 22 receptor subunit alpha 1                                              | 220056_at   | -1.702 | 0.001 | 243  | 114  | -2.1 | -1.5 | -1.1 |

|                 |                                                                         |             |        |       |      |      |      |      |      |
|-----------------|-------------------------------------------------------------------------|-------------|--------|-------|------|------|------|------|------|
| <i>BAG4</i>     | BCL2 associated athanogene 4                                            | 228189_at   | -1.699 | 0.001 | 387  | 249  | -1.6 | -1.4 | 1.0  |
| <i>SLC22A23</i> | solute carrier family 22 member 23                                      | 223194_s_at | -1.698 | 0.001 | 398  | 238  | -1.7 | -1.2 | 1.1  |
| <i>CWH43</i>    | cell wall biogenesis 43 C-terminal homolog                              | 220723_s_at | -1.698 | 0.001 | 592  | 208  | -2.8 | 1.2  | 1.1  |
| <i>KDM5B</i>    | lysine demethylase 5B                                                   | 201548_s_at | -1.698 | 0.001 | 447  | 291  | -1.5 | -1.1 | -1.4 |
| <i>HMGCR</i>    | 3-hydroxy-3-methylglutaryl-CoA reductase                                | 202540_s_at | -1.698 | 0.001 | 775  | 342  | -2.3 | 1.1  | 1.0  |
| <i>CRIM1</i>    | cysteine rich transmembrane BMP regulator 1                             | 202551_s_at | -1.697 | 0.001 | 534  | 304  | -1.8 | -1.3 | 5.2  |
| <i>AIMP1</i>    | aminoacyl tRNA synthetase complex interacting multifunctional protein 1 | 202541_at   | -1.696 | 0.001 | 342  | 213  | -1.6 | 1.3  | 1.2  |
| <i>S100A7</i>   | S100 calcium binding protein A7                                         | 205916_at   | -1.695 | 0.001 | 9043 | 6010 | -1.5 | 4.6  | -1.0 |
| <i>EIF4E3</i>   | eukaryotic translation initiation factor 4E family member 3             | 225941_at   | -1.695 | 0.001 | 240  | 137  | -1.7 | -1.3 | -1.1 |
| <i>IRX5</i>     | iroquois homeobox 5                                                     | 210239_at   | -1.695 | 0.001 | 348  | 164  | -2.1 | -1.3 | -1.7 |
| <i>CYLD</i>     | CYLD lysine 63 deubiquitinase                                           | 213295_at   | -1.695 | 0.001 | 328  | 202  | -1.6 | -1.0 | -1.4 |
| <i>RANBP6</i>   | RAN binding protein 6                                                   | 213019_at   | -1.695 | 0.001 | 341  | 209  | -1.6 | 1.0  | -1.5 |
| <i>ZNF430</i>   | zinc finger protein 430                                                 | 206829_x_at | -1.694 | 0.001 | 543  | 355  | -1.5 | 1.3  | 1.0  |
| <i>STAP2</i>    | signal transducing adaptor family member 2                              | 221610_s_at | -1.693 | 0.001 | 450  | 208  | -2.2 | 1.0  | 1.0  |
| <i>RANGAP1</i>  | Ran GTPase activating protein 1                                         | 212125_at   | -1.692 | 0.001 | 375  | 242  | -1.5 | -1.1 | 2.1  |
| <i>ABHD5</i>    | abhydrolase domain containing 5                                         | 213805_at   | -1.692 | 0.001 | 567  | 133  | -4.3 | 1.5  | -1.1 |
| <i>ME1</i>      | malic enzyme 1                                                          | 204059_s_at | -1.692 | 0.001 | 1502 | 552  | -2.7 | 1.7  | 3.4  |
| <i>SLC30A4</i>  | solute carrier family 30 member 4                                       | 227193_at   | -1.691 | 0.001 | 326  | 196  | -1.7 | 1.1  | 1.0  |
| <i>C15orf48</i> | chromosome 15 open reading frame 48                                     | 223484_at   | -1.690 | 0.001 | 1002 | 381  | -2.6 | 1.0  | 1.1  |
| <i>TRIM13</i>   | tripartite motif containing 13                                          | 229943_at   | -1.686 | 0.001 | 570  | 343  | -1.7 | 1.1  | -1.2 |
| <i>SMPD3</i>    | sphingomyelin phosphodiesterase 3                                       | 219695_at   | -1.686 | 0.001 | 369  | 146  | -2.5 | 1.1  | -1.0 |
| <i>RDH12</i>    | retinol dehydrogenase 12                                                | 242998_at   | -1.684 | 0.001 | 485  | 246  | -2.0 | -1.3 | -1.0 |
| <i>RCOR3</i>    | REST corepressor 3                                                      | 222605_at   | -1.683 | 0.001 | 486  | 319  | -1.5 | -1.1 | -3.1 |
| <i>S100A2</i>   | S100 calcium binding protein A2                                         | 204268_at   | -1.682 | 0.001 | 4615 | 2728 | -1.7 | 1.8  | 1.6  |
| <i>DUOX1</i>    | dual oxidase 1                                                          | 219597_s_at | -1.682 | 0.001 | 519  | 201  | -2.6 | 1.0  | 1.1  |
| <i>ZBTB7C</i>   | zinc finger and BTB domain containing 7C                                | 227782_at   | -1.681 | 0.001 | 496  | 249  | -2.0 | -1.2 | 1.0  |

|                 |                                                              |              |        |       |      |     |      |      |       |
|-----------------|--------------------------------------------------------------|--------------|--------|-------|------|-----|------|------|-------|
| <i>ACSL1</i>    | acyl-CoA synthetase long chain family member 1               | 201963_at    | -1.680 | 0.001 | 2000 | 996 | -2.0 | -1.0 | -3.1  |
| <i>FEM1B</i>    | fem-1 homolog B                                              | 212367_at    | -1.678 | 0.001 | 434  | 258 | -1.7 | 1.2  | -3.1  |
| <i>FBXO28</i>   | F-box protein 28                                             | 202271_at    | -1.677 | 0.001 | 834  | 503 | -1.7 | 1.0  | 1.4   |
| <i>RECQL</i>    | RecQ like helicase                                           | 212917_x_at  | -1.676 | 0.001 | 624  | 407 | -1.5 | 2.5  | 2.0   |
| <i>FAT2</i>     | FAT atypical cadherin 2                                      | 208153_s_at  | -1.674 | 0.001 | 259  | 102 | -2.5 | -1.8 | -1.0  |
| <i>NIPAL4</i>   | NIPA like domain containing 4                                | 230188_at    | -1.674 | 0.001 | 460  | 270 | -1.7 | -1.4 | 1.2   |
| <i>ITM2A</i>    | integral membrane protein 2A                                 | 202746_at    | -1.672 | 0.001 | 554  | 276 | -2.0 | -1.3 | 1.1   |
| <i>IPO7</i>     | importin 7                                                   | 200995_at    | -1.672 | 0.001 | 306  | 176 | -1.7 | -1.1 | 1.6   |
| <i>IRX3</i>     | iroquois homeobox 3                                          | 229638_at    | -1.671 | 0.001 | 1561 | 702 | -2.2 | -1.4 | -1.3  |
| <i>AJUBA</i>    | ajuba LIM protein                                            | 225806_at    | -1.671 | 0.001 | 256  | 124 | -2.1 | -2.4 | 3.3   |
| <i>DDHD1</i>    | DDHD domain containing 1                                     | 225971_at    | -1.668 | 0.001 | 287  | 157 | -1.8 | 1.9  | -1.2  |
| <i>CHURC1</i>   | churchill domain containing 1                                | 223210_at    | -1.668 | 0.001 | 490  | 291 | -1.7 | 1.2  | -2.1  |
| <i>ATMIN</i>    | ATM interactor                                               | 201855_s_at  | -1.668 | 0.001 | 434  | 268 | -1.6 | -1.1 | -3.8  |
| <i>MTURN</i>    | maturin, neural progenitor differentiation regulator homolog | 226018_at    | -1.667 | 0.001 | 290  | 139 | -2.1 | -2.0 | -10.2 |
| <i>PAQR3</i>    | progesterone and adipoQ receptor family member 3             | 213372_at    | -1.666 | 0.001 | 216  | 93  | -2.3 | 1.4  | -1.1  |
| <i>FAM83C</i>   | family with sequence similarity 83 member C                  | 1556793_a_at | -1.665 | 0.001 | 630  | 240 | -2.6 | -1.3 | ND    |
| <i>TPD52L1</i>  | TPD52 like 1                                                 | 203786_s_at  | -1.664 | 0.001 | 1149 | 610 | -1.9 | -1.2 | 1.4   |
| <i>IL18</i>     | interleukin 18                                               | 206295_at    | -1.664 | 0.001 | 557  | 138 | -4.0 | -1.0 | 1.1   |
| <i>ITGA2</i>    | integrin subunit alpha 2                                     | 227314_at    | -1.664 | 0.001 | 325  | 154 | -2.1 | -1.1 | 3.5   |
| <i>HOOK3</i>    | hook microtubule tethering protein 3                         | 226395_at    | -1.663 | 0.001 | 389  | 213 | -1.8 | -1.0 | -1.1  |
| <i>LAD1</i>     | ladinin 1                                                    | 203287_at    | -1.660 | 0.001 | 749  | 395 | -1.9 | -1.3 | -1.1  |
| <i>MAOA</i>     | monoamine oxidase A                                          | 212741_at    | -1.659 | 0.001 | 472  | 208 | -2.3 | -1.6 | -1.2  |
| <i>TMOD3</i>    | tropomodulin 3                                               | 223077_at    | -1.659 | 0.001 | 466  | 284 | -1.6 | 1.2  | 1.2   |
| <i>ARHGAP29</i> | Rho GTPase activating protein 29                             | 203910_at    | -1.657 | 0.001 | 563  | 320 | -1.8 | 1.6  | 2.9   |
| <i>ALG13</i>    | ALG13 UDP-N-acetylglucosaminyltransferase subunit            | 222808_at    | -1.657 | 0.001 | 324  | 209 | -1.5 | 1.3  | 1.5   |
| <i>USP15</i>    | ubiquitin specific peptidase 15                              | 210681_s_at  | -1.656 | 0.001 | 481  | 315 | -1.5 | 2.1  | 1.5   |
| <i>PLXNB1</i>   | plexin B1                                                    | 215807_s_at  | -1.655 | 0.001 | 381  | 244 | -1.6 | -1.2 | -3.1  |
| <i>PRKCI</i>    | protein kinase C iota                                        | 209678_s_at  | -1.655 | 0.001 | 1191 | 757 | -1.6 | 1.3  | 1.2   |



|                |                                                                  |             |        |       |      |      |      |      |      |
|----------------|------------------------------------------------------------------|-------------|--------|-------|------|------|------|------|------|
| <i>TWF1</i>    | twinfilin actin binding protein 1                                | 201745_at   | -1.653 | 0.001 | 784  | 507  | -1.5 | 2.0  | -3.8 |
| <i>TMEM33</i>  | transmembrane protein 33                                         | 225492_at   | -1.653 | 0.001 | 673  | 435  | -1.5 | 1.1  | -1.1 |
| <i>TLE4</i>    | TLE family member 4, transcriptional corepressor                 | 204872_at   | -1.650 | 0.001 | 331  | 159  | -2.1 | -1.7 | 2.0  |
| <i>KRT77</i>   | keratin 77                                                       | 237120_at   | -1.649 | 0.001 | 729  | 166  | -4.4 | -4.1 | 1.1  |
| <i>PDCD6IP</i> | programmed cell death 6 interacting protein                      | 222394_at   | -1.647 | 0.001 | 460  | 276  | -1.7 | -1.3 | -1.8 |
| <i>ZDHHC13</i> | zinc finger DHHC-type containing 13                              | 219296_at   | -1.647 | 0.001 | 269  | 135  | -2.0 | 1.2  | 1.4  |
| <i>SGPP2</i>   | sphingosine-1-phosphate phosphatase 2                            | 226560_at   | -1.646 | 0.001 | 935  | 241  | -3.9 | -1.0 | 1.2  |
| <i>CAMSAP2</i> | calmodulin regulated spectrin associated protein family member 2 | 212765_at   | -1.644 | 0.001 | 678  | 401  | -1.7 | -1.0 | -1.4 |
| <i>TTC22</i>   | tetratricopeptide repeat domain 22                               | 235651_at   | -1.641 | 0.001 | 440  | 187  | -2.4 | -1.3 | 1.1  |
| <i>PRXL2A</i>  | peroxiredoxin like 2A                                            | 228155_at   | -1.641 | 0.001 | 2200 | 1229 | -1.8 | -1.4 | -1.6 |
| <i>GNA13</i>   | G protein subunit alpha 13                                       | 224761_at   | -1.641 | 0.001 | 2349 | 1524 | -1.5 | 1.3  | -1.4 |
| <i>ATP10D</i>  | ATPase phospholipid transporting 10D (putative)                  | 213238_at   | -1.638 | 0.001 | 500  | 267  | -1.9 | 1.2  | -1.6 |
| <i>MARCH3</i>  | membrane associated ring-CH-type finger 3                        | 213256_at   | -1.638 | 0.001 | 347  | 170  | -2.0 | 1.1  | -1.1 |
| <i>FBXW7</i>   | F-box and WD repeat domain containing 7                          | 229419_at   | -1.637 | 0.001 | 245  | 116  | -2.1 | -1.6 | -1.1 |
| <i>CHMP4C</i>  | charged multivesicular body protein 4C                           | 226803_at   | -1.633 | 0.001 | 347  | 132  | -2.6 | -1.2 | -1.0 |
| <i>EXOC8</i>   | exocyst complex component 8                                      | 227577_at   | -1.632 | 0.001 | 299  | 178  | -1.7 | 1.6  | 1.1  |
| <i>RCOR1</i>   | REST corepressor 1                                               | 212612_at   | -1.631 | 0.001 | 371  | 241  | -1.5 | 1.1  | -1.4 |
| <i>JAG2</i>    | jagged canonical Notch ligand 2                                  | 209784_s_at | -1.630 | 0.001 | 442  | 280  | -1.6 | -1.5 | -1.6 |
| <i>ELOVL1</i>  | ELOVL fatty acid elongase 1                                      | 57163_at    | -1.622 | 0.001 | 1050 | 646  | -1.6 | 1.2  | 1.5  |
| <i>TTC37</i>   | tetratricopeptide repeat domain 37                               | 203048_s_at | -1.622 | 0.001 | 466  | 310  | -1.5 | 1.4  | -1.5 |
| <i>MCEE</i>    | methylmalonyl-CoA epimerase                                      | 226238_at   | -1.621 | 0.001 | 249  | 148  | -1.7 | 1.2  | -1.2 |
| <i>TBL1XR1</i> | transducin beta like 1 X-linked receptor 1                       | 221428_s_at | -1.620 | 0.001 | 313  | 188  | -1.7 | -1.0 | 1.0  |
| <i>KLK10</i>   | kallikrein related peptidase 10                                  | 209792_s_at | -1.620 | 0.001 | 1287 | 589  | -2.2 | 1.1  | -1.1 |
| <i>GCH1</i>    | GTP cyclohydrolase 1                                             | 204224_s_at | -1.619 | 0.001 | 388  | 193  | -2.0 | 2.1  | -1.0 |
| <i>SLMAP</i>   | sarcolemma associated protein                                    | 225243_s_at | -1.619 | 0.001 | 440  | 262  | -1.7 | 1.1  | -1.3 |
| <i>PGGT1B</i>  | protein geranylgeranyltransferase type I subunit beta            | 235615_at   | -1.618 | 0.001 | 218  | 113  | -1.9 | 1.3  | -1.0 |

|                |                                                       |              |        |       |      |     |      |      |      |
|----------------|-------------------------------------------------------|--------------|--------|-------|------|-----|------|------|------|
| <i>PPP2R5E</i> | protein phosphatase 2 regulatory subunit B'epsilon    | 227630_at    | -1.617 | 0.001 | 296  | 194 | -1.5 | -1.5 | -1.1 |
| <i>LAMA3</i>   | laminin subunit alpha 3                               | 203726_s_at  | -1.617 | 0.001 | 304  | 185 | -1.6 | -1.3 | 1.2  |
| <i>FAR1</i>    | fatty acyl-CoA reductase 1                            | 224866_at    | -1.616 | 0.001 | 372  | 234 | -1.6 | 1.6  | -1.0 |
| <i>SLC46A2</i> | solute carrier family 46 member 2                     | 223816_at    | -1.616 | 0.001 | 183  | 66  | -2.8 | -1.5 | 1.2  |
| <i>COMMD8</i>  | COMM domain containing 8                              | 218351_at    | -1.616 | 0.001 | 937  | 622 | -1.5 | 2.0  | -1.5 |
| <i>OTUB2</i>   | OTU deubiquitinase, ubiquitin aldehyde binding 2      | 219369_s_at  | -1.615 | 0.001 | 298  | 134 | -2.2 | 1.1  | 1.1  |
| <i>TPRG1</i>   | tumor protein p63 regulated 1                         | 229764_at    | -1.614 | 0.001 | 457  | 180 | -2.5 | -1.2 | -1.0 |
| <i>SRSF11</i>  | serine and arginine rich splicing factor 11           | 200685_at    | -1.613 | 0.001 | 320  | 175 | -1.8 | 1.3  | -1.1 |
| <i>NCOA2</i>   | nuclear receptor coactivator 2                        | 212867_at    | -1.612 | 0.001 | 568  | 370 | -1.5 | -1.0 | -1.3 |
| <i>RAP2C</i>   | RAP2C, member of RAS oncogene family                  | 218668_s_at  | -1.612 | 0.001 | 319  | 200 | -1.6 | 2.0  | 1.2  |
| <i>SPPL2A</i>  | signal peptide peptidase like 2A                      | 227682_at    | -1.612 | 0.001 | 301  | 162 | -1.9 | -1.1 | 1.6  |
| <i>DEFB1</i>   | defensin beta 1                                       | 210397_at    | -1.612 | 0.001 | 909  | 263 | -3.5 | 1.0  | 1.1  |
| <i>PALMD</i>   | palmdelphin                                           | 218736_s_at  | -1.611 | 0.001 | 682  | 294 | -2.3 | -1.1 | 1.2  |
| <i>RC3H1</i>   | ring finger and CCCH-type domains 1                   | 225893_at    | -1.611 | 0.001 | 530  | 335 | -1.6 | 1.0  | -1.2 |
| <i>MPP7</i>    | membrane palmitoylated protein 7                      | 238778_at    | -1.610 | 0.001 | 183  | 46  | -4.0 | -1.4 | 1.0  |
| <i>SPTLC3</i>  | serine palmitoyltransferase long chain base subunit 3 | 227752_at    | -1.610 | 0.001 | 274  | 91  | -3.0 | 1.1  | -1.3 |
| <i>TGFA</i>    | transforming growth factor alpha                      | 205016_at    | -1.609 | 0.001 | 309  | 145 | -2.1 | 1.1  | 30.6 |
| <i>ACPP</i>    | acid phosphatase, prostate                            | 204393_s_at  | -1.608 | 0.001 | 625  | 274 | -2.3 | 1.4  | 1.9  |
| <i>BBOX1</i>   | gamma-butyrobetaine hydroxylase 1                     | 205363_at    | -1.608 | 0.001 | 482  | 174 | -2.8 | -1.3 | 1.2  |
| <i>CASZ1</i>   | castor zinc finger 1                                  | 243386_at    | -1.605 | 0.001 | 343  | 90  | -3.8 | 1.0  | -1.1 |
| <i>DAPL1</i>   | death associated protein like 1                       | 229290_at    | -1.604 | 0.001 | 1763 | 363 | -4.9 | 1.1  | 1.1  |
| <i>SPINT1</i>  | serine peptidase inhibitor, Kunitz type 1             | 202826_at    | -1.601 | 0.001 | 685  | 386 | -1.8 | -1.4 | -1.1 |
| <i>FKBP5</i>   | FKBP prolyl isomerase 5                               | 224840_at    | -1.597 | 0.001 | 1756 | 995 | -1.8 | 1.7  | 1.6  |
| <i>ERBIN</i>   | erbb2 interacting protein                             | 222473_s_at  | -1.597 | 0.001 | 425  | 278 | -1.5 | 1.2  | -2.4 |
| <i>PRDM1</i>   | PR/SET domain 1                                       | 228964_at    | -1.597 | 0.001 | 738  | 435 | -1.7 | 1.3  | 1.4  |
| <i>PSAPL1</i>  | prosaposin like 1 (gene/pseudogene)                   | 1564333_a_at | -1.597 | 0.001 | 1460 | 416 | -3.5 | -1.4 | ND   |
| <i>SRD5A1</i>  | steroid 5 alpha-reductase 1                           | 204675_at    | -1.596 | 0.001 | 862  | 210 | -4.1 | -1.1 | -1.2 |
| <i>MTF1</i>    | metal regulatory transcription factor 1               | 227150_at    | -1.596 | 0.001 | 344  | 218 | -1.6 | 1.3  | -1.0 |
| <i>CCL18</i>   | C-C motif chemokine ligand 18                         | 32128_at     | -1.595 | 0.001 | 4098 | 928 | -4.4 | 12.0 | -2.0 |
| <i>TSPAN13</i> | tetraspanin 13                                        | 217979_at    | -1.594 | 0.001 | 707  | 387 | -1.8 | 1.9  | 12.7 |

|                 |                                                          |             |        |       |      |     |      |      |      |
|-----------------|----------------------------------------------------------|-------------|--------|-------|------|-----|------|------|------|
| <i>MAP4K5</i>   | mitogen-activated protein kinase kinase kinase 5         | 203552_at   | -1.593 | 0.001 | 322  | 194 | -1.7 | 1.0  | -1.1 |
| <i>NCOA7</i>    | nuclear receptor coactivator 7                           | 225344_at   | -1.592 | 0.001 | 939  | 594 | -1.6 | 1.6  | 1.6  |
| <i>HIP1R</i>    | huntingtin interacting protein 1 related                 | 38340_at    | -1.591 | 0.001 | 542  | 357 | -1.5 | -1.2 | -1.1 |
| <i>FOXQ1</i>    | forkhead box Q1                                          | 227475_at   | -1.590 | 0.001 | 600  | 241 | -2.5 | -3.0 | -1.6 |
| <i>IL11RA</i>   | interleukin 11 receptor subunit alpha                    | 204773_at   | -1.589 | 0.001 | 314  | 200 | -1.6 | -1.7 | -2.4 |
| <i>EPN3</i>     | epsin 3                                                  | 223895_s_at | -1.589 | 0.001 | 182  | 73  | -2.5 | 1.2  | -1.4 |
| <i>SEC24A</i>   | SEC24 homolog A, COPII coat complex component            | 212900_at   | -1.589 | 0.001 | 588  | 358 | -1.6 | 1.4  | 2.5  |
| <i>PCGF5</i>    | polycomb group ring finger 5                             | 226326_at   | -1.587 | 0.001 | 260  | 155 | -1.7 | -1.1 | -1.0 |
| <i>PTK6</i>     | protein tyrosine kinase 6                                | 206482_at   | -1.587 | 0.001 | 374  | 157 | -2.4 | -1.1 | -1.0 |
| <i>ACOX1</i>    | acyl-CoA oxidase 1                                       | 227962_at   | -1.587 | 0.001 | 449  | 286 | -1.6 | -1.3 | -1.5 |
| <i>MANSC1</i>   | MANSC domain containing 1                                | 220945_x_at | -1.584 | 0.001 | 735  | 387 | -1.9 | 1.1  | 1.4  |
| <i>DNASE1L2</i> | deoxyribonuclease 1 like 2                               | 207192_at   | -1.584 | 0.001 | 371  | 134 | -2.8 | -1.0 | -1.0 |
| <i>WDR47</i>    | WD repeat domain 47                                      | 203855_at   | -1.584 | 0.001 | 420  | 266 | -1.6 | -1.3 | 1.1  |
| <i>CARD18</i>   | caspase recruitment domain family member 18              | 231733_at   | -1.582 | 0.001 | 857  | 241 | -3.6 | 1.6  | 1.3  |
| <i>FAM241A</i>  | family with sequence similarity 241 member A             | 227856_at   | -1.582 | 0.001 | 357  | 197 | -1.8 | 1.1  | 1.5  |
| <i>MBOAT2</i>   | membrane bound O-acyltransferase domain containing 2     | 213288_at   | -1.581 | 0.001 | 600  | 349 | -1.7 | -1.0 | 1.1  |
| <i>MARVELD2</i> | MARVEL domain containing 2                               | 235141_at   | -1.579 | 0.001 | 219  | 108 | -2.0 | -1.3 | 1.3  |
| <i>GLRX</i>     | glutaredoxin                                             | 206662_at   | -1.578 | 0.001 | 1504 | 905 | -1.7 | 1.9  | 1.4  |
| <i>IREB2</i>    | iron responsive element binding protein 2                | 225892_at   | -1.578 | 0.001 | 361  | 232 | -1.6 | 1.3  | 1.1  |
| <i>UBN2</i>     | ubiquitin 2                                              | 225444_at   | -1.576 | 0.001 | 323  | 206 | -1.6 | -1.1 | -1.1 |
| <i>EFNB2</i>    | ephrin B2                                                | 202669_s_at | -1.576 | 0.001 | 495  | 213 | -2.3 | -1.2 | 1.6  |
| <i>PHF20L1</i>  | PHD finger protein 20 like 1                             | 226942_at   | -1.575 | 0.001 | 390  | 237 | -1.6 | 1.7  | -1.1 |
| <i>MAPK13</i>   | mitogen-activated protein kinase 13                      | 210058_at   | -1.575 | 0.001 | 604  | 370 | -1.6 | -1.1 | 1.2  |
| <i>ABHD17B</i>  | abhydrolase domain containing 17B                        | 227551_at   | -1.572 | 0.001 | 395  | 246 | -1.6 | -1.2 | -1.6 |
| <i>TIFA</i>     | TRAF interacting protein with forkhead associated domain | 226117_at   | -1.572 | 0.001 | 387  | 249 | -1.6 | 1.3  | 1.8  |
| <i>GAB1</i>     | GRB2 associated binding protein 1                        | 226002_at   | -1.572 | 0.001 | 237  | 136 | -1.7 | -1.3 | -1.4 |

|                 |                                                       |             |        |       |      |     |       |      |      |
|-----------------|-------------------------------------------------------|-------------|--------|-------|------|-----|-------|------|------|
| <i>XIST</i>     | X inactive specific transcript                        | 224588_at   | -1.571 | 0.001 | 1418 | 38  | -37.7 | -2.1 | 1.0  |
| <i>ETNK1</i>    | ethanolamine kinase 1                                 | 242059_at   | -1.571 | 0.001 | 420  | 199 | -2.1  | 3.2  | -1.1 |
| <i>NCK1</i>     | NCK adaptor protein 1                                 | 211063_s_at | -1.570 | 0.001 | 626  | 410 | -1.5  | 1.5  | -1.4 |
| <i>TNS4</i>     | tensin 4                                              | 230398_at   | -1.570 | 0.001 | 365  | 215 | -1.7  | -1.6 | 1.1  |
| <i>TMEM159</i>  | transmembrane protein 159                             | 213272_s_at | -1.570 | 0.001 | 281  | 161 | -1.7  | -2.0 | -1.5 |
| <i>KIAA0513</i> | KIAA0513                                              | 204546_at   | -1.569 | 0.001 | 254  | 151 | -1.7  | 1.1  | -1.5 |
| <i>NFIL3</i>    | nuclear factor, interleukin 3 regulated               | 203574_at   | -1.569 | 0.001 | 378  | 246 | -1.5  | 1.1  | -2.0 |
| <i>PTN</i>      | pleiotrophin                                          | 211737_x_at | -1.568 | 0.001 | 522  | 284 | -1.8  | -6.1 | 4.7  |
| <i>DEPTOR</i>   | DEP domain containing MTOR interacting protein        | 218858_at   | -1.568 | 0.001 | 366  | 222 | -1.6  | -1.3 | -1.1 |
| <i>CPA4</i>     | carboxypeptidase A4                                   | 205832_at   | -1.567 | 0.001 | 449  | 240 | -1.9  | -1.1 | -1.1 |
| <i>TMPRSS13</i> | transmembrane serine protease 13                      | 223659_at   | -1.566 | 0.001 | 275  | 175 | -1.6  | -1.3 | -1.2 |
| <i>ACBD5</i>    | acyl-CoA binding domain containing 5                  | 225663_at   | -1.566 | 0.001 | 530  | 345 | -1.5  | 1.2  | -3.0 |
| <i>GRHL2</i>    | grainyhead like transcription factor 2                | 219388_at   | -1.564 | 0.001 | 283  | 118 | -2.4  | -1.6 | 1.0  |
| <i>MBNL3</i>    | muscleblind like splicing regulator 3                 | 229498_at   | -1.556 | 0.001 | 443  | 261 | -1.7  | -1.1 | 1.4  |
| <i>CUL4A</i>    | cullin 4A                                             | 201424_s_at | -1.556 | 0.001 | 510  | 333 | -1.5  | 1.3  | -1.3 |
| <i>EVPL</i>     | envoplakin                                            | 204503_at   | -1.555 | 0.001 | 311  | 163 | -1.9  | -1.6 | 1.1  |
| <i>ALDH5A1</i>  | aldehyde dehydrogenase 5 family member A1             | 203608_at   | -1.554 | 0.001 | 340  | 167 | -2.0  | 1.1  | -1.1 |
| <i>KCTD1</i>    | potassium channel tetramerization domain containing 1 | 226245_at   | -1.554 | 0.001 | 548  | 321 | -1.7  | -1.7 | 1.0  |
| <i>C16orf72</i> | chromosome 16 open reading frame 72                   | 225197_at   | -1.554 | 0.001 | 321  | 213 | -1.5  | -1.2 | 1.6  |
| <i>VANGL2</i>   | VANGL planar cell polarity protein 2                  | 226029_at   | -1.553 | 0.001 | 318  | 181 | -1.8  | -1.0 | -2.2 |
| <i>LRP11</i>    | LDL receptor related protein 11                       | 225060_at   | -1.550 | 0.001 | 574  | 344 | -1.7  | 1.1  | 1.2  |
| <i>GRB7</i>     | growth factor receptor bound protein 7                | 210761_s_at | -1.550 | 0.001 | 258  | 154 | -1.7  | -1.1 | -1.1 |
| <i>NFIA</i>     | nuclear factor I A                                    | 224970_at   | -1.546 | 0.001 | 614  | 401 | -1.5  | -1.5 | -1.3 |
| <i>BLNK</i>     | B cell linker                                         | 207655_s_at | -1.546 | 0.001 | 478  | 242 | -2.0  | 2.4  | -1.1 |
| <i>ESRP2</i>    | epithelial splicing regulatory protein 2              | 219395_at   | -1.546 | 0.001 | 344  | 168 | -2.1  | -1.0 | 1.1  |
| <i>C11orf80</i> | chromosome 11 open reading frame 80                   | 238593_at   | -1.545 | 0.001 | 185  | 71  | -2.6  | 1.5  | 1.5  |
| <i>NR1D2</i>    | nuclear receptor subfamily 1 group D member 2         | 225768_at   | -1.544 | 0.001 | 314  | 199 | -1.6  | 2.0  | -1.1 |
| <i>DR1</i>      | down-regulator of transcription 1                     | 209187_at   | -1.542 | 0.001 | 692  | 443 | -1.6  | 1.1  | -1.1 |
| <i>PRSS3</i>    | serine protease 3                                     | 207463_x_at | -1.541 | 0.001 | 543  | 254 | -2.1  | 1.2  | 1.1  |

|                 |                                                                                  |             |        |       |      |      |       |      |      |
|-----------------|----------------------------------------------------------------------------------|-------------|--------|-------|------|------|-------|------|------|
| <i>TRIM16</i>   | tripartite motif containing 16                                                   | 204341_at   | -1.540 | 0.001 | 365  | 227  | -1.6  | -1.1 | 2.6  |
| <i>TNFAIP8</i>  | TNF alpha induced protein 8                                                      | 208296_x_at | -1.537 | 0.001 | 604  | 389  | -1.6  | 1.8  | 1.5  |
| <i>TMEM30B</i>  | transmembrane protein 30B                                                        | 213285_at   | -1.537 | 0.001 | 223  | 109  | -2.0  | -1.2 | 1.0  |
| <i>CHMP2B</i>   | charged multivesicular body protein 2B                                           | 202536_at   | -1.535 | 0.001 | 453  | 298  | -1.5  | 1.5  | -2.1 |
| <i>DAPP1</i>    | dual adaptor of phosphotyrosine and 3-phosphoinositides 1                        | 222858_s_at | -1.535 | 0.001 | 380  | 216  | -1.8  | 1.6  | 1.1  |
| <i>SCIN</i>     | scinderin                                                                        | 1552365_at  | -1.534 | 0.001 | 322  | 29   | -11.1 | 5.0  | ND   |
| <i>PPP6R3</i>   | protein phosphatase 6 regulatory subunit 3                                       | 222467_s_at | -1.533 | 0.001 | 429  | 274  | -1.6  | 1.2  | -1.0 |
| <i>ZNF451</i>   | zinc finger protein 451                                                          | 212557_at   | -1.532 | 0.001 | 387  | 251  | -1.5  | 1.4  | -1.5 |
| <i>TFAP2C</i>   | transcription factor AP-2 gamma                                                  | 205286_at   | -1.531 | 0.001 | 854  | 537  | -1.6  | -1.4 | 4.2  |
| <i>PGRMC1</i>   | progesterone receptor membrane component 1                                       | 201121_s_at | -1.531 | 0.001 | 2041 | 1296 | -1.6  | 1.0  | 1.7  |
| <i>WFDC21P</i>  | WAP four-disulfide core domain 21, pseudogene                                    | 229566_at   | -1.531 | 0.001 | 524  | 272  | -1.9  | -1.1 | 1.1  |
| <i>IL1R2</i>    | interleukin 1 receptor type 2                                                    | 205403_at   | -1.531 | 0.001 | 342  | 215  | -1.6  | -1.6 | 1.1  |
| <i>YIPF5</i>    | Yip1 domain family member 5                                                      | 224953_at   | -1.531 | 0.001 | 454  | 280  | -1.6  | -1.3 | -1.4 |
| <i>STARD5</i>   | StAR related lipid transfer domain containing 5                                  | 213820_s_at | -1.530 | 0.001 | 320  | 188  | -1.7  | -1.5 | -1.2 |
| <i>FZD3</i>     | frizzled class receptor 3                                                        | 239082_at   | -1.526 | 0.001 | 285  | 154  | -1.9  | -1.2 | -1.9 |
| <i>DENND2D</i>  | DENN domain containing 2D                                                        | 221081_s_at | -1.526 | 0.001 | 412  | 228  | -1.8  | 1.8  | 1.1  |
| <i>APOOL</i>    | apolipoprotein O like                                                            | 213282_at   | -1.525 | 0.001 | 311  | 207  | -1.5  | -1.2 | -1.5 |
| <i>APPL1</i>    | adaptor protein, phosphotyrosine interacting with PH domain and leucine zipper 1 | 218158_s_at | -1.525 | 0.001 | 269  | 165  | -1.6  | 1.2  | 1.1  |
| <i>ATP9A</i>    | ATPase phospholipid transporting 9A (putative)                                   | 212062_at   | -1.522 | 0.001 | 443  | 281  | -1.6  | 1.2  | 3.5  |
| <i>CYB5A</i>    | cytochrome b5 type A                                                             | 215726_s_at | -1.522 | 0.001 | 1208 | 542  | -2.2  | 1.1  | 1.3  |
| <i>DDX5</i>     | DEAD-box helicase 5                                                              | 225886_at   | -1.522 | 0.001 | 400  | 267  | -1.5  | -1.1 | -1.9 |
| <i>C9orf16</i>  | chromosome 9 open reading frame 16                                               | 41047_at    | -1.521 | 0.001 | 1236 | 821  | -1.5  | -1.2 | -1.2 |
| <i>CACNA2D1</i> | calcium voltage-gated channel auxiliary subunit alpha2delta 1                    | 227623_at   | -1.520 | 0.001 | 231  | 110  | -2.1  | -1.2 | 1.1  |
| <i>BSPRY</i>    | B-box and SPRY domain containing                                                 | 222746_s_at | -1.519 | 0.001 | 274  | 128  | -2.1  | -1.3 | -1.0 |

|                 |                                                        |              |        |       |      |     |      |      |      |
|-----------------|--------------------------------------------------------|--------------|--------|-------|------|-----|------|------|------|
| <i>MALAT1</i>   | metastasis associated lung adenocarcinoma transcript 1 | 224558_s_at  | -1.518 | 0.001 | 1421 | 876 | -1.6 | 1.7  | -1.7 |
| <i>LYNX1</i>    | Ly6/neurotoxin 1                                       | 1554179_s_at | -1.517 | 0.001 | 1675 | 784 | -2.1 | 1.2  | ND   |
| <i>STARD10</i>  | StAR related lipid transfer domain containing 10       | 223103_at    | -1.517 | 0.001 | 358  | 223 | -1.6 | -1.3 | -4.1 |
| <i>TET2</i>     | tet methylcytosine dioxygenase 2                       | 227624_at    | -1.516 | 0.001 | 256  | 136 | -1.9 | 1.1  | -1.0 |
| <i>MBNL2</i>    | muscleblind like splicing regulator 2                  | 203640_at    | -1.515 | 0.001 | 1043 | 650 | -1.6 | -1.3 | 1.1  |
| <i>SLC16A10</i> | solute carrier family 16 member 10                     | 222939_s_at  | -1.515 | 0.001 | 269  | 138 | -2.0 | -1.7 | -2.0 |
| <i>AADA2L2</i>  | arylacetamide deacetylase like 2                       | 240420_at    | -1.513 | 0.001 | 511  | 124 | -4.1 | 1.7  | -1.0 |
| <i>PNLIPRP3</i> | pancreatic lipase related protein 3                    | 1558846_at   | -1.513 | 0.001 | 701  | 130 | -5.4 | 2.6  | ND   |
| <i>EGR2</i>     | early growth response 2                                | 205249_at    | -1.513 | 0.001 | 613  | 345 | -1.8 | 1.4  | -1.1 |
| <i>DUOX1A1</i>  | dual oxidase maturation factor 1                       | 1554648_a_at | -1.511 | 0.001 | 340  | 130 | -2.6 | 1.2  | ND   |
| <i>PER2</i>     | period circadian regulator 2                           | 205251_at    | -1.511 | 0.001 | 587  | 386 | -1.5 | -1.2 | 1.2  |
| <i>C18orf25</i> | chromosome 18 open reading frame 25                    | 226406_at    | -1.510 | 0.001 | 311  | 206 | -1.5 | 1.0  | 1.0  |
| <i>ALDH3A1</i>  | aldehyde dehydrogenase 3 family member A1              | 205623_at    | -1.510 | 0.001 | 212  | 97  | -2.2 | -1.7 | -1.0 |
| <i>IRF2BP2</i>  | interferon regulatory factor 2 binding protein 2       | 224571_at    | -1.509 | 0.001 | 528  | 352 | -1.5 | -1.2 | -1.4 |
| <i>FZD6</i>     | frizzled class receptor 6                              | 203987_at    | -1.508 | 0.001 | 698  | 462 | -1.5 | 1.3  | 5.7  |
| <i>ERMP1</i>    | endoplasmic reticulum metalloproteinase 1              | 222603_at    | -1.508 | 0.001 | 282  | 144 | -2.0 | -1.2 | -3.1 |
| <i>RHOT1</i>    | ras homolog family member T1                           | 218323_at    | -1.506 | 0.001 | 517  | 344 | -1.5 | 1.1  | -1.3 |
| <i>SLC39A10</i> | solute carrier family 39 member 10                     | 225295_at    | -1.504 | 0.001 | 413  | 236 | -1.7 | 1.2  | 3.0  |
| <i>UBE2D3</i>   | ubiquitin conjugating enzyme E2 D3                     | 240383_at    | -1.504 | 0.001 | 369  | 185 | -2.0 | 3.9  | -1.1 |
| <i>TMEM41B</i>  | transmembrane protein 41B                              | 212622_at    | -1.504 | 0.001 | 523  | 315 | -1.7 | -1.0 | 1.3  |
| <i>MSMO1</i>    | methylsterol monooxygenase 1                           | 209146_at    | -1.502 | 0.001 | 2250 | 780 | -2.9 | 1.4  | 2.7  |
| <i>CPD</i>      | carboxypeptidase D                                     | 201941_at    | -1.502 | 0.001 | 584  | 366 | -1.6 | 1.1  | 1.3  |
| <i>GOLT1B</i>   | golgi transport 1B                                     | 222552_at    | -1.500 | 0.001 | 750  | 463 | -1.6 | 1.8  | 2.8  |
| <i>LRRC8B</i>   | leucine rich repeat containing 8 VRAC subunit B        | 212978_at    | -1.499 | 0.001 | 300  | 188 | -1.6 | 1.1  | -1.1 |
| <i>ZNF292</i>   | zinc finger protein 292                                | 212368_at    | -1.499 | 0.001 | 824  | 531 | -1.6 | 1.2  | -1.1 |
| <i>MBLAC2</i>   | metallo-beta-lactamase domain containing 2             | 230298_at    | -1.498 | 0.001 | 256  | 148 | -1.7 | -1.3 | -1.1 |

|                 |                                                |              |        |       |      |      |      |      |      |
|-----------------|------------------------------------------------|--------------|--------|-------|------|------|------|------|------|
| <i>ABI3BP</i>   | ABI family member 3 binding protein            | 223395_at    | -1.497 | 0.001 | 725  | 441  | -1.6 | -1.0 | 1.5  |
| <i>IL37</i>     | interleukin 37                                 | 221470_s_at  | -1.496 | 0.001 | 218  | 56   | -3.9 | -2.2 | 1.1  |
| <i>DLG1</i>     | discs large MAGUK scaffold protein 1           | 202514_at    | -1.495 | 0.001 | 315  | 189  | -1.7 | -1.1 | -3.2 |
| <i>LPCAT2</i>   | lysophosphatidylcholine acyltransferase 2      | 227889_at    | -1.495 | 0.001 | 368  | 180  | -2.0 | -1.5 | 2.2  |
| <i>ANK2</i>     | ankyrin 2                                      | 202920_at    | -1.495 | 0.001 | 654  | 433  | -1.5 | -1.9 | -2.7 |
| <i>ANXA9</i>    | annexin A9                                     | 210085_s_at  | -1.493 | 0.001 | 286  | 162  | -1.8 | -1.2 | 1.0  |
| <i>TST</i>      | thiosulfate sulfurtransferase                  | 209605_at    | -1.492 | 0.001 | 496  | 256  | -1.9 | 1.2  | -1.2 |
| <i>SPRR4</i>    | small proline rich protein 4                   | 1552620_at   | -1.492 | 0.001 | 2040 | 595  | -3.4 | -1.1 | ND   |
| <i>RABGAP1L</i> | RAB GTPase activating protein 1 like           | 203020_at    | -1.492 | 0.001 | 353  | 214  | -1.6 | 1.0  | -1.2 |
| <i>SPRR1A</i>   | small proline rich protein 1A                  | 214549_x_at  | -1.491 | 0.001 | 3550 | 1998 | -1.8 | 2.7  | -1.1 |
| <i>CYP4F22</i>  | cytochrome P450 family 4 subfamily F member 22 | 244692_at    | -1.489 | 0.001 | 390  | 116  | -3.3 | 1.3  | 1.3  |
| <i>RSF1</i>     | remodeling and spacing factor 1                | 235381_at    | -1.484 | 0.001 | 464  | 295  | -1.6 | 1.1  | 1.1  |
| <i>ANO1</i>     | anoctamin 1                                    | 218804_at    | -1.483 | 0.001 | 267  | 140  | -1.9 | -2.1 | 1.2  |
| <i>CD207</i>    | CD207 molecule                                 | 220428_at    | -1.483 | 0.001 | 381  | 175  | -2.2 | -1.8 | -1.0 |
| <i>SEH1L</i>    | SEH1 like nucleoporin                          | 221931_s_at  | -1.482 | 0.001 | 701  | 466  | -1.5 | -1.0 | 2.8  |
| <i>KIZ</i>      | kizuna centrosomal protein                     | 219961_s_at  | -1.482 | 0.001 | 317  | 191  | -1.7 | 1.0  | -1.8 |
| <i>SLC39A6</i>  | solute carrier family 39 member 6              | 202089_s_at  | -1.480 | 0.001 | 1479 | 918  | -1.6 | -1.2 | -4.8 |
| <i>CNFN</i>     | cornifelin                                     | 224329_s_at  | -1.478 | 0.001 | 2022 | 921  | -2.2 | 1.9  | -1.0 |
| <i>LYPD6B</i>   | LY6/PLAUR domain containing 6B                 | 228360_at    | -1.477 | 0.001 | 208  | 97   | -2.1 | -1.9 | 1.4  |
| <i>BICDL1</i>   | BICD family like cargo adaptor 1               | 228320_x_at  | -1.476 | 0.001 | 238  | 133  | -1.8 | -1.3 | -1.7 |
| <i>MYC</i>      | MYC proto-oncogene, bHLH transcription factor  | 202431_s_at  | -1.475 | 0.001 | 1751 | 1037 | -1.7 | -1.2 | -1.4 |
| <i>GRAMD2B</i>  | GRAM domain containing 2B                      | 218706_s_at  | -1.469 | 0.001 | 437  | 282  | -1.5 | -1.1 | -1.4 |
| <i>FOXP1</i>    | forkhead box N1                                | 1558687_a_at | -1.466 | 0.001 | 292  | 101  | -2.9 | -1.6 | ND   |
| <i>GRAMD1C</i>  | GRAM domain containing 1C                      | 219313_at    | -1.463 | 0.001 | 198  | 49   | -4.1 | 1.8  | 1.0  |
| <i>PMVK</i>     | phosphomevalonate kinase                       | 203515_s_at  | -1.459 | 0.001 | 637  | 343  | -1.9 | 1.0  | 1.2  |
| <i>LY75</i>     | lymphocyte antigen 75                          | 205668_at    | -1.456 | 0.001 | 279  | 134  | -2.1 | 1.3  | -1.1 |
| <i>TIAM1</i>    | T cell lymphoma invasion and metastasis 1      | 213135_at    | -1.455 | 0.001 | 923  | 536  | -1.7 | -1.1 | 2.1  |
| <i>ZBTB43</i>   | zinc finger and BTB domain containing 43       | 227991_x_at  | -1.455 | 0.001 | 310  | 193  | -1.6 | -1.1 | 1.1  |
| <i>KIAA1522</i> | KIAA1522                                       | 224746_at    | -1.454 | 0.001 | 626  | 392  | -1.6 | -1.5 | -1.2 |

|                 |                                                        |              |        |       |      |      |      |      |      |
|-----------------|--------------------------------------------------------|--------------|--------|-------|------|------|------|------|------|
| <i>CYSRT1</i>   | cysteine rich tail 1                                   | 1569144_a_at | -1.453 | 0.001 | 382  | 197  | -1.9 | 1.0  | ND   |
| <i>DPY19L4</i>  | dpy-19 like 4                                          | 226721_at    | -1.453 | 0.001 | 257  | 150  | -1.7 | -1.1 | 1.7  |
| <i>SLURP1</i>   | secreted LY6/PLAUR domain containing 1                 | 214536_at    | -1.452 | 0.001 | 1849 | 598  | -3.1 | 1.0  | 1.0  |
| <i>COL7A1</i>   | collagen type VII alpha 1 chain                        | 204136_at    | -1.452 | 0.001 | 322  | 195  | -1.7 | -1.1 | -1.1 |
| <i>LRRC1</i>    | leucine rich repeat containing 1                       | 218816_at    | -1.450 | 0.001 | 229  | 116  | -2.0 | -1.8 | 1.1  |
| <i>ALCAM</i>    | activated leukocyte cell adhesion molecule             | 201952_at    | -1.449 | 0.001 | 804  | 459  | -1.8 | 1.2  | 4.1  |
| <i>FAM167A</i>  | family with sequence similarity 167 member A           | 226614_s_at  | -1.449 | 0.001 | 279  | 148  | -1.9 | -1.4 | 1.6  |
| <i>DHCR24</i>   | 24-dehydrocholesterol reductase                        | 200862_at    | -1.448 | 0.001 | 2240 | 844  | -2.7 | -1.2 | 5.0  |
| <i>OCIAD2</i>   | OCIA domain containing 2                               | 225314_at    | -1.447 | 0.001 | 474  | 309  | -1.5 | 1.1  | 1.1  |
| <i>POU2F3</i>   | POU class 2 homeobox 3                                 | 207109_at    | -1.446 | 0.001 | 184  | 43   | -4.3 | -2.0 | 1.0  |
| <i>ZNF91</i>    | zinc finger protein 91                                 | 206059_at    | -1.445 | 0.001 | 1025 | 469  | -2.2 | 1.5  | -1.4 |
| <i>PPP1R14C</i> | protein phosphatase 1 regulatory inhibitor subunit 14C | 226907_at    | -1.443 | 0.001 | 592  | 372  | -1.6 | -1.8 | 1.1  |
| <i>KCTD12</i>   | potassium channel tetramerization domain containing 12 | 212192_at    | -1.442 | 0.001 | 1567 | 1042 | -1.5 | 1.3  | -1.2 |
| <i>SLC15A1</i>  | solute carrier family 15 member 1                      | 207254_at    | -1.442 | 0.001 | 243  | 84   | -2.9 | 1.5  | -1.1 |
| <i>NIBAN1</i>   | niban apoptosis regulator 1                            | 217967_s_at  | -1.441 | 0.001 | 885  | 581  | -1.5 | 1.2  | 10.4 |
| <i>DGAT2</i>    | diacylglycerol O-acyltransferase 2                     | 226064_s_at  | -1.441 | 0.001 | 1345 | 283  | -4.8 | -1.2 | 2.0  |
| <i>MTX3</i>     | metaxin 3                                              | 226528_at    | -1.441 | 0.001 | 360  | 235  | -1.5 | 1.2  | 1.6  |
| <i>MGST1</i>    | microsomal glutathione S-transferase 1                 | 224918_x_at  | -1.440 | 0.001 | 2607 | 1086 | -2.4 | 1.4  | 1.1  |
| <i>SOSTDC1</i>  | sclerostin domain containing 1                         | 213456_at    | -1.439 | 0.001 | 466  | 163  | -2.9 | -1.7 | 1.1  |
| <i>CPSF6</i>    | cleavage and polyadenylation specific factor 6         | 226934_at    | -1.437 | 0.001 | 229  | 114  | -2.0 | -1.0 | 1.5  |
| <i>PRDX2</i>    | peroxiredoxin 2                                        | 39729_at     | -1.436 | 0.001 | 2100 | 1377 | -1.5 | 1.1  | -1.9 |
| <i>ZNF662</i>   | zinc finger protein 662                                | 228538_at    | -1.433 | 0.001 | 216  | 89   | -2.4 | 1.2  | -1.1 |
| <i>PKN2</i>     | protein kinase N2                                      | 212628_at    | -1.432 | 0.001 | 290  | 179  | -1.6 | -1.0 | -1.0 |
| <i>ZEB2</i>     | zinc finger E-box binding homeobox 2                   | 228333_at    | -1.431 | 0.001 | 385  | 249  | -1.5 | -1.4 | -3.9 |
| <i>HOMER2</i>   | homer scaffold protein 2                               | 217080_s_at  | -1.430 | 0.001 | 335  | 178  | -1.9 | 1.0  | -1.1 |
| <i>EBP</i>      | EBP cholesterol delta-isomerase                        | 202735_at    | -1.429 | 0.001 | 458  | 288  | -1.6 | 1.1  | 1.2  |
| <i>PEX3</i>     | peroxisomal biogenesis factor 3                        | 203972_s_at  | -1.426 | 0.001 | 550  | 270  | -2.0 | 1.3  | 1.1  |
| <i>LPAR1</i>    | lysophosphatidic acid receptor 1                       | 204036_at    | -1.425 | 0.001 | 374  | 230  | -1.6 | -2.2 | 1.4  |



|                 |                                                                              |             |        |       |      |     |      |      |      |
|-----------------|------------------------------------------------------------------------------|-------------|--------|-------|------|-----|------|------|------|
| <i>DOP1A</i>    | DOP1 leucine zipper like protein A                                           | 213271_s_at | -1.424 | 0.001 | 297  | 196 | -1.5 | -1.0 | -1.9 |
| <i>EPB41L4B</i> | erythrocyte membrane protein band 4.1 like 4B                                | 220161_s_at | -1.423 | 0.001 | 310  | 151 | -2.1 | -1.5 | 1.2  |
| <i>RAB7B</i>    | RAB7B, member RAS oncogene family                                            | 230266_at   | -1.422 | 0.001 | 272  | 163 | -1.7 | -1.2 | 2.0  |
| <i>PPP4R2</i>   | protein phosphatase 4 regulatory subunit 2                                   | 226317_at   | -1.422 | 0.001 | 341  | 224 | -1.5 | 1.1  | -1.4 |
| <i>IFRD1</i>    | interferon related developmental regulator 1                                 | 202146_at   | -1.421 | 0.001 | 426  | 276 | -1.5 | 1.8  | -1.1 |
| <i>ZADH2</i>    | zinc binding alcohol dehydrogenase domain containing 2                       | 227049_at   | -1.420 | 0.001 | 381  | 252 | -1.5 | -1.3 | -1.7 |
| <i>RPS23</i>    | ribosomal protein S23                                                        | 227722_at   | -1.419 | 0.001 | 406  | 239 | -1.7 | -1.9 | -1.3 |
| <i>NOD2</i>     | nucleotide binding oligomerization domain containing 2                       | 220066_at   | -1.419 | 0.001 | 267  | 158 | -1.7 | 1.7  | 1.1  |
| <i>PREPL</i>    | prolyl endopeptidase like                                                    | 212215_at   | -1.418 | 0.001 | 413  | 275 | -1.5 | -1.2 | -2.3 |
| <i>SCOC</i>     | short coiled-coil protein                                                    | 223341_s_at | -1.418 | 0.001 | 296  | 190 | -1.6 | 1.9  | -1.1 |
| <i>FAM199X</i>  | family with sequence similarity 199, X-linked                                | 225216_at   | -1.418 | 0.001 | 344  | 227 | -1.5 | 1.0  | 1.1  |
| <i>ELL3</i>     | elongation factor for RNA polymerase II 3                                    | 219517_at   | -1.418 | 0.001 | 292  | 185 | -1.6 | -1.2 | -1.1 |
| <i>LTN1</i>     | listerin E3 ubiquitin protein ligase 1                                       | 215596_s_at | -1.417 | 0.001 | 489  | 322 | -1.5 | 1.3  | 1.1  |
| <i>RHOU</i>     | ras homolog family member U                                                  | 223168_at   | -1.417 | 0.001 | 331  | 194 | -1.7 | 2.4  | 1.3  |
| <i>PMAIP1</i>   | phorbol-12-myristate-13-acetate-induced protein 1                            | 204285_s_at | -1.417 | 0.001 | 728  | 419 | -1.7 | 1.9  | 4.1  |
| <i>MOB1B</i>    | MOB kinase activator 1B                                                      | 225997_at   | -1.412 | 0.001 | 429  | 267 | -1.6 | 1.2  | -1.3 |
| <i>LUC7L3</i>   | LUC7 like 3 pre-mRNA splicing factor                                         | 229193_at   | -1.412 | 0.001 | 244  | 111 | -2.2 | 1.9  | -1.1 |
| <i>GNPAT</i>    | glyceronephosphate O-acyltransferase                                         | 201956_s_at | -1.411 | 0.001 | 974  | 599 | -1.6 | 1.2  | -1.2 |
| <i>DYNC1LI1</i> | dynein cytoplasmic 1 light intermediate chain 1                              | 217976_s_at | -1.411 | 0.001 | 377  | 240 | -1.6 | 1.2  | -1.5 |
| <i>PCMTD2</i>   | protein-L-isoaspartate (D-aspartate) O-methyltransferase domain containing 2 | 212406_s_at | -1.411 | 0.001 | 1097 | 590 | -1.9 | -1.0 | -5.7 |
| <i>ECHDC2</i>   | enoyl-CoA hydratase domain containing 2                                      | 218552_at   | -1.409 | 0.001 | 782  | 424 | -1.8 | -1.1 | -1.3 |
| <i>ARHGAP5</i>  | Rho GTPase activating protein 5                                              | 217936_at   | -1.408 | 0.001 | 490  | 308 | -1.6 | 1.2  | -1.4 |
| <i>METTL7A</i>  | methyltransferase like 7A                                                    | 207761_s_at | -1.408 | 0.001 | 1370 | 825 | -1.7 | 1.0  | -1.3 |

|                  |                                                          |              |        |       |      |      |      |      |      |
|------------------|----------------------------------------------------------|--------------|--------|-------|------|------|------|------|------|
| <i>LINC00302</i> | long intergenic non-protein coding RNA 302               | 216935_at    | -1.408 | 0.001 | 469  | 182  | -2.6 | -1.3 | 1.0  |
| <i>HCAR3</i>     | hydroxycarboxylic acid receptor 3                        | 205220_at    | -1.405 | 0.001 | 460  | 235  | -2.0 | -1.0 | -1.1 |
| <i>TM7SF2</i>    | transmembrane 7 superfamily member 2                     | 210130_s_at  | -1.404 | 0.001 | 541  | 190  | -2.8 | -1.0 | 1.2  |
| <i>ALOX12B</i>   | arachidonate 12-lipoxygenase, 12R type                   | 207381_at    | -1.404 | 0.001 | 549  | 237  | -2.3 | 1.1  | -1.0 |
| <i>IGFL2</i>     | IGF like family member 2                                 | 231148_at    | -1.404 | 0.001 | 563  | 223  | -2.5 | 1.2  | 1.0  |
| <i>RNASE7</i>    | ribonuclease A family member 7                           | 234700_s_at  | -1.403 | 0.001 | 280  | 110  | -2.6 | 1.4  | -1.1 |
| <i>VSIG10L</i>   | V-set and immunoglobulin domain containing 10 like       | 238654_at    | -1.403 | 0.001 | 529  | 244  | -2.2 | 1.1  | -1.7 |
| <i>SERPINB3</i>  | serpin family B member 3                                 | 209719_x_at  | -1.402 | 0.001 | 3479 | 1979 | -1.8 | 6.3  | 1.1  |
| <i>LRIG1</i>     | leucine rich repeats and immunoglobulin like domains 1   | 211596_s_at  | -1.399 | 0.001 | 237  | 126  | -1.9 | -1.8 | 1.1  |
| <i>HMGCS1</i>    | 3-hydroxy-3-methylglutaryl-CoA synthase 1                | 221750_at    | -1.398 | 0.001 | 461  | 152  | -3.0 | 1.1  | 1.3  |
| <i>CSNK1G3</i>   | casein kinase 1 gamma 3                                  | 220768_s_at  | -1.398 | 0.001 | 371  | 239  | -1.6 | 1.4  | -1.3 |
| <i>ZNF493</i>    | zinc finger protein 493                                  | 1558486_at   | -1.397 | 0.001 | 297  | 136  | -2.2 | 1.5  | ND   |
| <i>VDR</i>       | vitamin D receptor                                       | 204254_s_at  | -1.394 | 0.001 | 366  | 240  | -1.5 | -1.1 | 1.2  |
| <i>TMEM254</i>   | transmembrane protein 254                                | 222545_s_at  | -1.394 | 0.001 | 409  | 230  | -1.8 | -1.3 | -1.1 |
| <i>PDLIM5</i>    | PDZ and LIM domain 5                                     | 212412_at    | -1.392 | 0.001 | 1137 | 753  | -1.5 | 1.3  | 1.5  |
| <i>FAM171B</i>   | family with sequence similarity 171 member B             | 227370_at    | -1.390 | 0.001 | 261  | 130  | -2.0 | 1.2  | -1.2 |
| <i>FBXL16</i>    | F-box and leucine rich repeat protein 16                 | 227641_at    | -1.388 | 0.001 | 294  | 175  | -1.7 | -1.6 | -1.7 |
| <i>ISOC1</i>     | isochorismatase domain containing 1                      | 218170_at    | -1.387 | 0.001 | 556  | 272  | -2.0 | -1.3 | 1.2  |
| <i>TMEM45B</i>   | transmembrane protein 45B                                | 226226_at    | -1.387 | 0.001 | 378  | 199  | -1.9 | 1.4  | 1.2  |
| <i>FAM185A</i>   | family with sequence similarity 185 member A             | 1556373_a_at | -1.385 | 0.001 | 350  | 194  | -1.8 | 1.7  | ND   |
| <i>GPSM2</i>     | G protein signaling modulator 2                          | 230002_at    | -1.379 | 0.001 | 481  | 244  | -2.0 | -1.2 | 1.5  |
| <i>PNISR</i>     | PNN interacting serine and arginine rich protein         | 212179_at    | -1.378 | 0.001 | 406  | 257  | -1.6 | 1.1  | -2.3 |
| <i>PPIF</i>      | peptidylprolyl isomerase F                               | 201490_s_at  | -1.378 | 0.001 | 634  | 412  | -1.5 | 1.7  | 2.2  |
| <i>CLIP4</i>     | CAP-Gly domain containing linker protein family member 4 | 226425_at    | -1.377 | 0.001 | 390  | 208  | -1.9 | 1.1  | -1.1 |
| <i>PSME4</i>     | proteasome activator subunit 4                           | 212222_at    | -1.376 | 0.001 | 285  | 181  | -1.6 | 1.2  | 1.1  |

|                 |                                                                  |             |        |       |      |      |      |      |       |
|-----------------|------------------------------------------------------------------|-------------|--------|-------|------|------|------|------|-------|
| <i>MUCL1</i>    | mucin like 1                                                     | 1553602_at  | -1.376 | 0.001 | 3555 | 1633 | -2.2 | 1.1  | ND    |
| <i>RBM47</i>    | RNA binding motif protein 47                                     | 218035_s_at | -1.376 | 0.001 | 587  | 248  | -2.4 | 1.3  | 1.1   |
| <i>FRY</i>      | FRY microtubule binding protein                                  | 204072_s_at | -1.375 | 0.001 | 273  | 166  | -1.6 | 1.2  | -2.4  |
| <i>NECTIN4</i>  | nectin cell adhesion molecule 4                                  | 223540_at   | -1.375 | 0.001 | 440  | 242  | -1.8 | -1.4 | 1.0   |
| <i>TRPM1</i>    | transient receptor potential cation channel subfamily M member 1 | 237070_at   | -1.374 | 0.001 | 710  | 296  | -2.4 | -1.5 | -10.3 |
| <i>CYB561A3</i> | cytochrome b561 family member A3                                 | 224735_at   | -1.374 | 0.001 | 786  | 499  | -1.6 | -1.5 | -11.0 |
| <i>TGM1</i>     | transglutaminase 1                                               | 206008_at   | -1.373 | 0.001 | 529  | 287  | -1.8 | 1.3  | -1.0  |
| <i>PXMP4</i>    | peroxisomal membrane protein 4                                   | 219428_s_at | -1.373 | 0.001 | 574  | 346  | -1.7 | -1.0 | -1.0  |
| <i>DUSP16</i>   | dual specificity phosphatase 16                                  | 224832_at   | -1.371 | 0.001 | 513  | 248  | -2.1 | 1.2  | -1.4  |
| <i>INTS6</i>    | integrator complex subunit 6                                     | 218819_at   | -1.371 | 0.001 | 594  | 393  | -1.5 | 1.7  | -1.1  |
| <i>DSC2</i>     | desmocollin 2                                                    | 226817_at   | -1.371 | 0.001 | 1454 | 906  | -1.6 | 2.9  | 1.0   |
| <i>CA2</i>      | carbonic anhydrase 2                                             | 209301_at   | -1.370 | 0.001 | 800  | 393  | -2.0 | -1.0 | -1.1  |
| <i>AHNAK</i>    | AHNAK nucleoprotein                                              | 220016_at   | -1.369 | 0.001 | 294  | 152  | -1.9 | -1.8 | -1.4  |
| <i>COBLL1</i>   | cordons-bleu WH2 repeat protein like 1                           | 203642_s_at | -1.369 | 0.001 | 265  | 153  | -1.7 | -1.1 | -1.2  |
| <i>PARD3</i>    | par-3 family cell polarity regulator                             | 210094_s_at | -1.368 | 0.001 | 346  | 227  | -1.5 | -1.4 | 1.4   |
| <i>C1orf68</i>  | chromosome 1 open reading frame 68                               | 217087_at   | -1.366 | 0.001 | 486  | 203  | -2.4 | -2.8 | 1.2   |
| <i>HS3ST6</i>   | heparan sulfate-glucosamine 3-sulfotransferase 6                 | 239547_at   | -1.365 | 0.001 | 166  | 64   | -2.6 | -1.5 | -1.3  |
| <i>CDA</i>      | cytidine deaminase                                               | 205627_at   | -1.365 | 0.001 | 330  | 148  | -2.2 | 2.0  | 1.3   |
| <i>SERPINB2</i> | serpin family B member 2                                         | 204614_at   | -1.365 | 0.001 | 774  | 496  | -1.6 | -1.0 | 17.6  |
| <i>DGKH</i>     | diacylglycerol kinase eta                                        | 227415_at   | -1.361 | 0.001 | 261  | 158  | -1.6 | 1.5  | 1.5   |
| <i>RNF39</i>    | ring finger protein 39                                           | 219916_s_at | -1.361 | 0.001 | 370  | 219  | -1.7 | -1.4 | 1.1   |
| <i>PANK1</i>    | pantothenate kinase 1                                            | 226649_at   | -1.361 | 0.001 | 331  | 97   | -3.4 | 1.1  | 1.2   |
| <i>AKR1C3</i>   | aldo-keto reductase family 1 member C3                           | 209160_at   | -1.360 | 0.001 | 348  | 214  | -1.6 | 1.5  | 1.1   |
| <i>IL20RA</i>   | interleukin 20 receptor subunit alpha                            | 219115_s_at | -1.357 | 0.001 | 168  | 37   | -4.6 | -1.6 | 1.0   |
| <i>CDC73</i>    | cell division cycle 73                                           | 235196_at   | -1.355 | 0.001 | 344  | 222  | -1.6 | 1.1  | 1.3   |
| <i>FNIP1</i>    | folliculin interacting protein 1                                 | 228250_at   | -1.354 | 0.001 | 329  | 202  | -1.6 | 1.4  | -1.0  |
| <i>ENDOU</i>    | endonuclease, poly(U) specific                                   | 206605_at   | -1.352 | 0.001 | 289  | 90   | -3.2 | -1.3 | -1.3  |
| <i>ELOVL5</i>   | ELOVL fatty acid elongase 5                                      | 208788_at   | -1.351 | 0.001 | 2511 | 1371 | -1.8 | 1.4  | 1.4   |
| <i>TFAP2A</i>   | transcription factor AP-2 alpha                                  | 204653_at   | -1.351 | 0.001 | 3089 | 2052 | -1.5 | -1.1 | -12.5 |
| <i>NMU</i>      | neuromedin U                                                     | 206023_at   | -1.349 | 0.001 | 515  | 178  | -2.9 | -1.5 | 1.0   |
| <i>SC5D</i>     | sterol-C5-desaturase                                             | 211423_s_at | -1.348 | 0.001 | 771  | 362  | -2.1 | 1.7  | 1.0   |

|                  |                                                          |              |        |       |      |      |      |      |      |
|------------------|----------------------------------------------------------|--------------|--------|-------|------|------|------|------|------|
| <i>SLC25A43</i>  | solute carrier family 25 member 43                       | 1557411_s_at | -1.348 | 0.001 | 339  | 220  | -1.5 | -1.1 | ND   |
| <i>SLC6A14</i>   | solute carrier family 6 member 14                        | 219795_at    | -1.347 | 0.001 | 192  | 57   | -3.4 | 2.6  | 1.0  |
| <i>CD1C</i>      | CD1c molecule                                            | 205987_at    | -1.346 | 0.001 | 342  | 196  | -1.7 | -1.3 | 1.1  |
| <i>DDX52</i>     | DExD-box helicase 52                                     | 213637_at    | -1.345 | 0.001 | 352  | 224  | -1.6 | 1.7  | -1.0 |
| <i>CLU</i>       | clusterin                                                | 208791_at    | -1.343 | 0.001 | 583  | 359  | -1.6 | -1.0 | -1.1 |
| <i>LYPD5</i>     | LY6/PLAUR domain containing 5                            | 236039_at    | -1.343 | 0.001 | 238  | 136  | -1.7 | -1.3 | 1.1  |
| <i>DMD</i>       | dystrophin                                               | 203881_s_at  | -1.341 | 0.001 | 251  | 127  | -2.0 | -2.0 | 1.3  |
| <i>RALGAPA1</i>  | Ral GTPase activating protein catalytic alpha subunit 1  | 213049_at    | -1.341 | 0.001 | 437  | 291  | -1.5 | -1.0 | -1.9 |
| <i>SERPINB13</i> | serpin family B member 13                                | 217272_s_at  | -1.340 | 0.001 | 1385 | 562  | -2.5 | 2.9  | 1.3  |
| <i>KRT17</i>     | keratin 17                                               | 212236_x_at  | -1.339 | 0.001 | 7348 | 4774 | -1.5 | 1.8  | 1.2  |
| <i>ANKRD44</i>   | ankyrin repeat domain 44                                 | 226641_at    | -1.337 | 0.001 | 308  | 197  | -1.6 | 2.2  | -3.3 |
| <i>ATP11B</i>    | ATPase phospholipid transporting 11B (putative)          | 212536_at    | -1.333 | 0.001 | 439  | 280  | -1.6 | 1.1  | -1.1 |
| <i>MAP2</i>      | microtubule associated protein 2                         | 225540_at    | -1.333 | 0.001 | 556  | 288  | -1.9 | -2.1 | 2.3  |
| <i>MYO5B</i>     | myosin VB                                                | 225301_s_at  | -1.332 | 0.001 | 491  | 283  | -1.7 | -1.1 | 1.2  |
| <i>CFD</i>       | complement factor D                                      | 205382_s_at  | -1.328 | 0.001 | 1262 | 674  | -1.9 | -1.3 | 1.1  |
| <i>CRYBG2</i>    | crystallin beta-gamma domain containing 2                | 220289_s_at  | -1.327 | 0.001 | 209  | 102  | -2.0 | 1.0  | -1.0 |
| <i>YOD1</i>      | YOD1 deubiquitinase                                      | 227309_at    | -1.327 | 0.001 | 838  | 370  | -2.3 | 1.5  | 1.2  |
| <i>AGL</i>       | amylo-alpha-1, 6-glucosidase, 4-alpha-glucanotransferase | 203566_s_at  | -1.326 | 0.001 | 449  | 276  | -1.6 | 1.6  | -1.3 |
| <i>FCGBP</i>     | Fc fragment of IgG binding protein                       | 203240_at    | -1.326 | 0.001 | 575  | 301  | -1.9 | -1.5 | -1.0 |
| <i>CD36</i>      | CD36 molecule                                            | 206488_s_at  | -1.325 | 0.001 | 859  | 516  | -1.7 | 7.0  | -2.6 |
| <i>SLC2A1</i>    | solute carrier family 2 member 1                         | 201250_s_at  | -1.325 | 0.001 | 520  | 340  | -1.5 | -1.4 | 1.8  |
| <i>ACADM</i>     | acyl-CoA dehydrogenase medium chain                      | 202502_at    | -1.325 | 0.001 | 1250 | 679  | -1.8 | 1.2  | -1.3 |
| <i>SLC44A1</i>   | solute carrier family 44 member 1                        | 224596_at    | -1.325 | 0.001 | 1522 | 997  | -1.5 | 1.1  | -2.7 |
| <i>NQO2</i>      | N-ribosyldihyronicotinamide:quinone reductase 2          | 203814_s_at  | -1.325 | 0.001 | 865  | 550  | -1.6 | 1.1  | -1.5 |
| <i>KCNK7</i>     | potassium two pore domain channel subfamily K member 7   | 224055_x_at  | -1.320 | 0.001 | 204  | 102  | -2.0 | -1.9 | 1.3  |
| <i>BOK</i>       | BCL2 family apoptosis regulator BOK                      | 223349_s_at  | -1.320 | 0.001 | 306  | 200  | -1.5 | 1.1  | -1.0 |

|              |                                            |             |        |       |      |     |      |     |      |
|--------------|--------------------------------------------|-------------|--------|-------|------|-----|------|-----|------|
| <i>ADTRP</i> | androgen dependent TFPI regulating protein | 229070_at   | -1.319 | 0.001 | 551  | 135 | -4.1 | 1.3 | -1.1 |
| <i>MPZL2</i> | myelin protein zero like 2                 | 203780_at   | -1.318 | 0.001 | 622  | 286 | -2.2 | 2.6 | -1.0 |
| <i>CDC42</i> | cell division cycle 42                     | 208727_s_at | -1.317 | 0.001 | 1593 | 952 | -1.7 | 1.4 | -1.1 |
| <i>HOOK1</i> | hook microtubule tethering protein 1       | 225792_at   | -1.316 | 0.001 | 301  | 115 | -2.6 | 1.4 | 1.0  |

---

Only probesets with unique annotations are shown.

ND, not determined
