# Supplementary material for: Prolyl 4‐hydroxylase subunit alpha 1 (P4HA1) is a biomarker of poor prognosis in primary melanomas, and its depletion inhibits melanoma cell invasion and disrupts tumor blood vessel walls
Source: PubMed Central journal article supplement (PMC7138405; doi:10.1002/1878-0261.12649), 2020-02-28
Supplement: MOL2-14-742-s019.pdf [file MOL2-14-742-s019.pdf]

**Table S4.** Gene Set Enrichment Analysis results for genes associated most significantly with patient survival.

|                                                          | Gene set collection   | Gene set                                                             | Normalized enrichment score | False discovery rate q-value |
|----------------------------------------------------------|-----------------------|----------------------------------------------------------------------|-----------------------------|------------------------------|
| Genes associated with short survival                     | HALLMARK              | EPITHELIAL_MESENCHYMAL_TRANSITION                                    | 3.454                       | 0.000                        |
|                                                          |                       | COAGULATION                                                          | 2.882                       | 0.000                        |
|                                                          |                       | COMPLEMENT                                                           | 2.083                       | 0.015                        |
|                                                          | KEGG                  | FOCAL_ADHESION                                                       | 2.316                       | 0.008                        |
|                                                          |                       | ECM_RECEPTOR_INTERACTION                                             | 2.314                       | 0.004                        |
|                                                          |                       | LYSOSOME                                                             | 2.038                       | 0.011                        |
|                                                          |                       | REGULATION_OF_ACTIN_CYTOSKELETON                                     | 1.920                       | 0.016                        |
|                                                          | REACTOME              | EXTRACELLULAR_MATRIX_ORGANIZATION                                    | 3.125                       | 0.000                        |
|                                                          |                       | COLLAGEN_FORMATION                                                   | 2.668                       | 0.001                        |
|                                                          |                       | DIABETES_PATHWAYS                                                    | 2.638                       | 0.000                        |
|                                                          |                       | METABOLISM_OF_CARBOHYDRATES                                          | 2.571                       | 0.000                        |
|                                                          |                       | PLATELET_ACTIVATION_SIGNALING_AND_AGGREGATION                        | 2.328                       | 0.002                        |
|                                                          |                       | RESPONSE_TO_ELEVATED_PLATELET_CYTOSOLIC_CA2                          | 2.154                       | 0.009                        |
|                                                          |                       | HEMOSTASIS                                                           | 1.896                       | 0.038                        |
|                                                          |                       | INTEGRIN_CELL_SURFACE_INTERACTIONS                                   | 1.837                       | 0.050                        |
|                                                          | GO BIOLOGICAL PROCESS | ANGIOGENESIS                                                         | 2.817                       | 0.002                        |
|                                                          |                       | PLATELET_DEGRANULATION                                               | 2.790                       | 0.002                        |
|                                                          |                       | SINGLE_ORGANISM_CATABOLIC_PROCESS                                    | 2.687                       | 0.003                        |
|                                                          |                       | EXTRACELLULAR_STRUCTURE_ORGANIZATION                                 | 2.589                       | 0.004                        |
|                                                          |                       | MULTICELLULAR_ORGANISM_METABOLIC_PROCESS                             | 2.505                       | 0.007                        |
| MULTICELLULAR_ORGANISMAL_MACROMOLECULE_METABOLIC_PROCESS |                       | 2.443                                                                | 0.011                       |                              |
| BLOOD_VESSEL_MORPHOGENESIS                               |                       | 2.404                                                                | 0.014                       |                              |
| RESPONSE_TO_TOPOLOGICALLY_INCORRECT_PROTEIN              |                       | 2.341                                                                | 0.021                       |                              |
| REGENERATION                                             |                       | 2.311                                                                | 0.024                       |                              |
| REGULATED_EXOCYTOSIS                                     |                       | 2.286                                                                | 0.025                       |                              |
| RECEPTOR_MEDIATED_ENDOCYTOSIS                            |                       | 2.215                                                                | 0.039                       |                              |
| EXOCYTOSIS                                               |                       | 2.207                                                                | 0.037                       |                              |
| Genes associated with long survival                      | HALLMARK              | ADIPOGENESIS                                                         | -2.037                      | 0.039                        |
|                                                          | GO BIOLOGICAL PROCESS | EPIDERMAL_CELL_DIFFERENTIATION                                       | -2.751                      | 0.002                        |
|                                                          |                       | SKIN_DEVELOPMENT                                                     | -2.683                      | 0.002                        |
|                                                          |                       | EPIDERMIS_DEVELOPMENT                                                | -2.681                      | 0.001                        |
|                                                          |                       | KERATINOCYTE_DIFFERENTIATION                                         | -2.681                      | 0.001                        |
|                                                          |                       | PROTEIN_LOCALIZATION_TO_CELL_PERIPHERY                               | -2.320                      | 0.021                        |
|                                                          |                       | POSITIVE_REGULATION_OF_TRANSCRIPTION_FROM_RNA_POLYMERASE_II_PROMOTER | -2.233                      | 0.032                        |
