# Supplementary material for: Prolyl 4‐hydroxylase subunit alpha 1 (P4HA1) is a biomarker of poor prognosis in primary melanomas, and its depletion inhibits melanoma cell invasion and disrupts tumor blood vessel walls
Source: PubMed Central journal article supplement (PMC7138405; doi:10.1002/1878-0261.12649), 2020-02-28
Supplement: MOL2-14-742-s020.pdf [file MOL2-14-742-s020.pdf]

**Table S5.** Kaplan-Meier survival analysis and mean survival times of patients with primary melanomas that show low and high mRNA expression of the top short survival marker genes in an independent RNA sequencing data set (GSE98394).

| <b>Gene</b>     |                      | <b>Mean survival time<br/>(months <math>\pm</math> SE)</b> | <b>Log rank test<br/>p-value</b> |
|-----------------|----------------------|------------------------------------------------------------|----------------------------------|
| <i>CNP</i>      | Low mRNA expression  | 102.2 $\pm$ 7.3                                            | 0.03                             |
|                 | High mRNA expression | 75.4 $\pm$ 9.7                                             |                                  |
| <i>P4HA1</i>    | Low mRNA expression  | 113.5 $\pm$ 4.8                                            | <0.001                           |
|                 | High mRNA expression | 64.0 $\pm$ 9.2                                             |                                  |
| <i>RHOC</i>     | Low mRNA expression  | 114.2 $\pm$ 4.2                                            | <0.001                           |
|                 | High mRNA expression | 63.2 $\pm$ 9.3                                             |                                  |
| <i>SORT1</i>    | Low mRNA expression  | 110.0 $\pm$ 5.5                                            | <0.001                           |
|                 | High mRNA expression | 67.5 $\pm$ 9.6                                             |                                  |
| <i>CD63</i>     | Low mRNA expression  | 113.7 $\pm$ 4.6                                            | <0.001                           |
|                 | High mRNA expression | 63.8 $\pm$ 9.3                                             |                                  |
| <i>CDK2AP1</i>  | Low mRNA expression  | 112.3 $\pm$ 4.5                                            | <0.001                           |
|                 | High mRNA expression | 65.3 $\pm$ 9.7                                             |                                  |
| <i>BIRC7</i>    | Low mRNA expression  | 107.6 $\pm$ 6.2                                            | 0.004                            |
|                 | High mRNA expression | 69.6 $\pm$ 9.6                                             |                                  |
| <i>BIN3</i>     | Low mRNA expression  | 106.0 $\pm$ 6.6                                            | 0.005                            |
|                 | High mRNA expression | 71.5 $\pm$ 9.7                                             |                                  |
| <i>ARHGEF40</i> | Low mRNA expression  | 104.1 $\pm$ 6.7                                            | 0.025                            |
|                 | High mRNA expression | 73.4 $\pm$ 9.9                                             |                                  |
| <i>SHC1</i>     | Low mRNA expression  | 105.6 $\pm$ 6.8                                            | 0.006                            |
|                 | High mRNA expression | 72.0 $\pm$ 9.6                                             |                                  |
| <i>FN1</i>      | Low mRNA expression  | 107.7 $\pm$ 6.6                                            | 0.001                            |
|                 | High mRNA expression | 69.8 $\pm$ 9.4                                             |                                  |
| <i>TLNRD1</i>   | Low mRNA expression  | 105.0 $\pm$ 6.5                                            | 0.022                            |
|                 | High mRNA expression | 72.0 $\pm$ 9.8                                             |                                  |
| <i>ARPC1B</i>   | Low mRNA expression  | 110.7 $\pm$ 6.4                                            | <0.001 <sup>†</sup>              |
|                 | High mRNA expression | 66.9 $\pm$ 8.9                                             |                                  |
| <i>PSMB4</i>    | Low mRNA expression  | 113.5 $\pm$ 5.3                                            | <0.001 <sup>†</sup>              |
|                 | High mRNA expression | 63.7 $\pm$ 8.9                                             |                                  |
| <i>FKBP11</i>   | Low mRNA expression  | 107.5 $\pm$ 6.7                                            | 0.001                            |
|                 | High mRNA expression | 70.0 $\pm$ 9.3                                             |                                  |
| <i>COL9A3</i>   | Low mRNA expression  | 107.5 $\pm$ 6.0                                            | 0.004                            |
|                 | High mRNA expression | 70.0 $\pm$ 9.8                                             |                                  |
| <i>GNG5</i>     | Low mRNA expression  | 103.8 $\pm$ 6.9                                            | 0.024                            |
|                 | High mRNA expression | 73.7 $\pm$ 9.8                                             |                                  |
| <i>ETV5</i>     | Low mRNA expression  | 101.3 $\pm$ 7.7                                            | 0.039                            |
|                 | High mRNA expression | 76.2 $\pm$ 9.5                                             |                                  |
| <i>TYR</i>      | Low mRNA expression  | 109.0 $\pm$ 5.9                                            | 0.001                            |
|                 | High mRNA expression | 68.4 $\pm$ 9.5                                             |                                  |
| <i>SOX10</i>    | Low mRNA expression  | 101.6 $\pm$ 7.5                                            | 0.034                            |
|                 | High mRNA expression | 75.9 $\pm$ 9.6                                             |                                  |
| <i>PSRC1</i>    | Low mRNA expression  | 104.5 $\pm$ 6.7                                            | 0.029                            |
|                 | High mRNA expression | 73.1 $\pm$ 9.8                                             |                                  |
| <i>DUSP4</i>    | Low mRNA expression  | 110.4 $\pm$ 5.4                                            | 0.001                            |
|                 | High mRNA expression | 67.2 $\pm$ 9.6                                             |                                  |
| <i>BACE2</i>    | Low mRNA expression  | 105.5 $\pm$ 6.9                                            | 0.007                            |
|                 | High mRNA expression | 72.1 $\pm$ 9.5                                             |                                  |

<sup>†</sup>curves cross
