# Supplementary material for: Prolyl 4‐hydroxylase subunit alpha 1 (P4HA1) is a biomarker of poor prognosis in primary melanomas, and its depletion inhibits melanoma cell invasion and disrupts tumor blood vessel walls
Source: PubMed Central journal article supplement (PMC7138405; doi:10.1002/1878-0261.12649), 2020-02-28
Supplement: MOL2-14-742-s022.pdf [file MOL2-14-742-s022.pdf]

**Table S7.** Expression levels of genes encoding collagen domain-containing proteins in 62 melanoma cell lines (E-GEOD-7127).

| Gene                  | Gene description                                                                    | Probe set ID | Mean $\pm$ StDev                 | Fold                           |
|-----------------------|-------------------------------------------------------------------------------------|--------------|----------------------------------|--------------------------------|
|                       |                                                                                     |              | Melanoma cell lines ( $n = 62$ ) | Melanoma cells* vs melanocytes |
| <i>CTHRC1</i>         | Collagen triple helix repeat containing 1                                           | 225681_at    | 3759 $\pm$ 2908                  | 85.1                           |
| <i>COL4A2</i>         | Collagen, type IV, alpha 2                                                          | 211964_at    | 1587 $\pm$ 1573                  | 2.0                            |
| <i>COL1A2</i>         | Collagen, type I, alpha 2                                                           | 202403_s_at  | 1179 $\pm$ 2429                  | 1.0                            |
| <i>COL5A2</i>         | Collagen, type V, alpha 2                                                           | 221729_at    | 1013 $\pm$ 1353                  | 1.6                            |
| <i>COL4A1</i>         | Collagen, type IV, alpha 1                                                          | 211980_at    | 929 $\pm$ 1100                   | 2.8                            |
| <i>COL9A3</i>         | Collagen, type IX, alpha 3                                                          | 204724_s_at  | 844 $\pm$ 999                    | 11.4                           |
| <i>COL11A1</i>        | Collagen, type XI, alpha 1                                                          | 37892_at     | 768 $\pm$ 1532                   | -1.5                           |
| <i>WDR33</i>          | WD repeat domain 33                                                                 | 222763_s_at  | 656 $\pm$ 276                    | 1.1                            |
| <i>COL6A1</i>         | Collagen, type VI, alpha 1                                                          | 213428_s_at  | 650 $\pm$ 953                    | 1.9                            |
| <i>COL12A1</i>        | Collagen, type XII, alpha 1                                                         | 225664_at    | 487 $\pm$ 1519                   | 12.0                           |
| <i>COL15A1</i>        | Collagen, type XV, alpha 1                                                          | 203477_at    | 416 $\pm$ 1098                   | 8.5                            |
| <i>COL8A1</i>         | Collagen, type VIII, alpha 1                                                        | 226237_at    | 402 $\pm$ 956                    | 16.7                           |
| <i>COL6A2</i>         | Collagen, type VI, alpha 2                                                          | 209156_s_at  | 303 $\pm$ 474                    | 3.1                            |
| <i>COL18A1</i>        | Collagen, type XVIII, alpha 1                                                       | 209081_s_at  | 277 $\pm$ 266                    | -3.2                           |
| <i>EMILIN2</i>        | Elastin microfibril interfacier 2                                                   | 224374_s_at  | 273 $\pm$ 254                    | 1.1                            |
| <i>COL3A1</i>         | Collagen, type III, alpha 1                                                         | 215076_s_at  | 270 $\pm$ 1433                   | 1.0                            |
| <i>COL16A1</i>        | Collagen, type XVI, alpha 1                                                         | 204345_at    | 265 $\pm$ 238                    | -1.1                           |
| <i>COL27A1</i>        | Collagen, type XXVII, alpha 1                                                       | 225293_at    | 256 $\pm$ 335                    | -2.6                           |
| <i>COL1A1</i>         | Collagen, type I, alpha 1                                                           | 1556499_s_at | 240 $\pm$ 1103                   | ND                             |
| <i>COL13A1</i>        | Collagen, type XIII, alpha 1                                                        | 211343_s_at  | 221 $\pm$ 423                    | 4.6                            |
| <i>COL7A1</i>         | Collagen, type VII, alpha 1                                                         | 204136_at    | 195 $\pm$ 258                    | 1.0                            |
| <i>C1QTNF3</i>        | C1q and tumor necrosis factor related protein 3                                     | 220988_s_at  | 190 $\pm$ 623                    | 1.2                            |
| <i>C1QTNF1</i>        | C1q and tumor necrosis factor related protein 1                                     | 220975_s_at  | 146 $\pm$ 50                     | -1.1                           |
| <i>EMILIN1</i>        | Elastin microfibril interfacier 1                                                   | 204163_at    | 144 $\pm$ 210                    | 5.8                            |
| <i>COL5A1</i>         | Collagen, type V, alpha 1                                                           | 203325_s_at  | 128 $\pm$ 295                    | 1.3                            |
| <i>COL6A3</i>         | Collagen, type VI, alpha 3                                                          | 201438_at    | 120 $\pm$ 468                    | 1.1                            |
| <i>COL11A2</i>        | Collagen, type XI, alpha 2                                                          | 216993_s_at  | 119 $\pm$ 24                     | 1.0                            |
| <i>C1QTNF5 / MFRP</i> | C1q and tumor necrosis factor related protein 5 / membrane frizzled-related protein | 224286_at    | 112 $\pm$ 11                     | 1.0                            |
| <i>COL26A1</i>        | Collagen, type XXVI, alpha 1                                                        | 233894_x_at  | 105 $\pm$ 13                     | 1.0                            |
| <i>EDA</i>            | Ectodysplasin A                                                                     | 206217_at    | 85 $\pm$ 13                      | 1.0                            |

\*WM793 and WM239 melanoma cell lines.
