# Supplementary material for: Prolyl 4‐hydroxylase subunit alpha 1 (P4HA1) is a biomarker of poor prognosis in primary melanomas, and its depletion inhibits melanoma cell invasion and disrupts tumor blood vessel walls
Source: PubMed Central journal article supplement (PMC7138405; doi:10.1002/1878-0261.12649), 2020-02-28
Supplement: MOL2-14-742-s023.pdf [file MOL2-14-742-s023.pdf]

**Table S8.** Genes correlating with P4HA1 expression in a panel of 62 melanoma cell lines (E-GEOD-7127).

| Gene                              | Gene description                                                                | Probe set ID | Pearson correlation |
|-----------------------------------|---------------------------------------------------------------------------------|--------------|---------------------|
| <i>P4HA1</i>                      | Prolyl 4-hydroxylase subunit alpha 1                                            | 207543_s_at  | 1.000               |
| <i>MIR210HG</i>                   | MIR210 host gene                                                                | 230710_at    | 0.607               |
| <i>FUT11</i>                      | Fucosyltransferase 11                                                           | 226348_at    | 0.581               |
| <i>AK4</i>                        | Adenylate kinase 4                                                              | 230630_at    | 0.561               |
| <i>P4HA2</i>                      | Prolyl 4-hydroxylase subunit alpha 2                                            | 202733_at    | 0.558               |
| <i>TMEM263</i>                    | Transmembrane protein 263                                                       | 224759_s_at  | 0.553               |
| <i>TMEM45A</i>                    | Transmembrane protein 45A                                                       | 219410_at    | 0.551               |
| <i>BNIP3</i>                      | BCL2 interacting protein 3                                                      | 201849_at    | 0.536               |
| <i>ANGPTL4</i>                    | Angiopoietin-like 4                                                             | 221009_s_at  | 0.530               |
| <i>DDIT4</i>                      | DNA-damage-inducible transcript 4                                               | 202887_s_at  | 0.522               |
| <i>ITGB1</i>                      | Integrin subunit beta 1                                                         | 216178_x_at  | 0.513               |
| <i>HTR2A</i>                      | 5-hydroxytryptamine receptor 2A                                                 | 244130_at    | 0.512               |
| <i>ALDH18A1</i>                   | Aldehyde dehydrogenase 18 family, member A1                                     | 222416_at    | 0.508               |
| <i>VEGFA</i>                      | Vascular endothelial growth factor A                                            | 210512_s_at  | 0.504               |
| <i>PLOD1</i>                      | Procollagen-lysine, 2-oxoglutarate 5-dioxygenase 1                              | 200827_at    | 0.491               |
| <i>TWSG1</i>                      | Twisted gastrulation BMP signaling modulator 1                                  | 225406_at    | 0.485               |
| <i>UBTD1</i>                      | Ubiquitin domain containing 1                                                   | 219172_at    | 0.479               |
| <i>HYPK /// MIR1282 /// SERF2</i> | Huntingtin interacting protein K /// MicroRNA 1282 /// Small EDRK-rich factor 2 | 226692_at    | 0.476               |
| <i>HIF1A</i>                      | Hypoxia inducible factor 1, subunit alpha                                       | 200989_at    | 0.473               |
| <i>SLC22A3</i>                    | Solute carrier family 22, member 3                                              | 205421_at    | 0.473               |
| <i>RHCE /// RHD</i>               | Rh blood group, CcEe antigens /// Rh blood group, D antigen                     | 215819_s_at  | 0.468               |
| <i>RSPH3</i>                      | Radial spoke head 3 homolog                                                     | 229810_at    | 0.468               |
| <i>KGFLP2</i>                     | Fibroblast growth factor 7 pseudogene 3                                         | 231031_at    | 0.467               |
| <i>TAF9B</i>                      | TATA box binding protein associated factor 9b                                   | 228483_s_at  | 0.467               |
| <i>HSPA13</i>                     | Heat shock protein family A (Hsp70) member 13                                   | 202557_at    | 0.465               |
| <i>TNFAIP6</i>                    | TNF alpha induced protein 6                                                     | 206026_s_at  | 0.463               |
| <i>CNIH4</i>                      | Cornichon family AMPA receptor auxiliary protein 4                              | 228437_at    | 0.462               |
| <i>ANKRD37</i>                    | Ankyrin repeat domain 37                                                        | 227337_at    | 0.460               |
| <i>ZNF432</i>                     | Zinc finger protein 432                                                         | 219848_s_at  | 0.459               |
| <i>SLC35B3</i>                    | Solute carrier family 35, member B3                                             | 222691_at    | 0.459               |
| <i>REEP3</i>                      | Receptor accessory protein 3                                                    | 225785_at    | 0.455               |
| <i>PDK1</i>                       | Pyruvate dehydrogenase kinase 1                                                 | 226452_at    | 0.454               |
| <i>HTR7P1</i>                     | 5-hydroxytryptamine receptor 7 pseudogene 1                                     | 236115_at    | 0.450               |
| <i>SSR1</i>                       | signal sequence receptor subunit 1                                              | 200891_s_at  | 0.450               |
| <i>SGCB</i>                       | sarcoglycan, beta                                                               | 226112_at    | 0.449               |
| <i>SLC16A1</i>                    | solute carrier family 16, member 1                                              | 202234_s_at  | 0.448               |
| <i>SLC44A2</i>                    | solute carrier family 44, member 2                                              | 225175_s_at  | 0.448               |
| <i>IRAK3</i>                      | interleukin-1 receptor-associated kinase 3                                      | 213817_at    | 0.448               |
| <i>PLAGL1</i>                     | PLAG1 like zinc finger 1                                                        | 207943_x_at  | 0.445               |
| <i>ENC1</i>                       | ectodermal-neural cortex 1                                                      | 201341_at    | 0.444               |
| <i>ADAMTS1</i>                    | ADAM metalloproteinase with thrombospondin type 1 motif 1                       | 222162_s_at  | 0.444               |
| <i>THAP2</i>                      | THAP domain containing 2                                                        | 223588_at    | 0.444               |
| <i>ALDH1L2</i>                    | aldehyde dehydrogenase 1 family, member L2                                      | 231202_at    | 0.442               |
