# Supplementary material for: Prolyl 4‐hydroxylase subunit alpha 1 (P4HA1) is a biomarker of poor prognosis in primary melanomas, and its depletion inhibits melanoma cell invasion and disrupts tumor blood vessel walls
Source: PubMed Central journal article supplement (PMC7138405; doi:10.1002/1878-0261.12649), 2020-02-28
Supplement: MOL2-14-742-s024.pdf [file MOL2-14-742-s024.pdf]

**Table S9.** Gene Set Enrichment Analysis results for genes that correlate with P4HA1 expression in melanoma cell lines and primary melanoma tissues.

| <b>Gene set collection</b> | <b>Gene set</b>                   | <b>Normalized enrichment score</b> | <b>False discovery rate q-value</b> |
|----------------------------|-----------------------------------|------------------------------------|-------------------------------------|
| Melanoma cell lines        |                                   |                                    |                                     |
| HALLMARK                   | EPITHELIAL_MESENCHYMAL_TRANSITION | 3.839                              | <0.0001                             |
|                            | HYPOXIA                           | 3.285                              | <0.0001                             |
|                            | GLYCOLYSIS                        | 2.607                              | <0.0001                             |
|                            | MTORC1_SIGNALING                  | 2.014                              | 0.008                               |
|                            | INFLAMMATORY_RESPONSE             | 1.758                              | 0.024                               |
| Primary melanoma tissues   |                                   |                                    |                                     |
| HALLMARK                   | HYPOXIA                           | 3.049                              | <0.0001                             |
|                            | GLYCOLYSIS                        | 2.527                              | <0.0001                             |
|                            | MTORC1_SIGNALING                  | 2.439                              | <0.0001                             |
