# Supplementary material for: Prolyl 4‐hydroxylase subunit alpha 1 (P4HA1) is a biomarker of poor prognosis in primary melanomas, and its depletion inhibits melanoma cell invasion and disrupts tumor blood vessel walls
Source: PubMed Central journal article supplement (PMC7138405; doi:10.1002/1878-0261.12649), 2020-02-28
Supplement: MOL2-14-742-s025.pdf [file MOL2-14-742-s025.pdf]

**Table S10.** Gene expression changes in WM239 cells after knockdown of P4HA1 expression.

| Gene                                   | Gene description                                                 | Wald statistic | Adjusted p-value | Normalized counts $\pm$ StDev                      |                                         | Fold  |
|----------------------------------------|------------------------------------------------------------------|----------------|------------------|----------------------------------------------------|-----------------------------------------|-------|
|                                        |                                                                  |                |                  | WM239 parental and control shRNA cells ( $n = 4$ ) | WM239 P4HA1-knockdown cells ( $n = 4$ ) |       |
| Downregulated in P4HA1-knockdown cells |                                                                  |                |                  |                                                    |                                         |       |
| <i>P4HA1</i>                           | Prolyl 4-hydroxylase subunit alpha 1                             | -18.352        | 3.01E-71         | 2476 $\pm$ 457                                     | 474 $\pm$ 37                            | -5.23 |
| <i>LAMA5</i>                           | Laminin subunit alpha 5                                          | -5.582         | 7.51E-05         | 1096 $\pm$ 167                                     | 793 $\pm$ 179                           | -1.38 |
| <i>SPIRE1</i>                          | Spire type actin nucleation factor 1                             | -5.076         | 0.00074          | 608 $\pm$ 92                                       | 420 $\pm$ 15                            | -1.45 |
| <i>MT-RNR2</i>                         | Mitochondrially encoded 16S RNA                                  | -4.460         | 0.011            | 95597 $\pm$ 10123                                  | 68555 $\pm$ 9427                        | -1.39 |
| <i>LPL</i>                             | Lipoprotein lipase                                               | -4.336         | 0.017            | 4310 $\pm$ 1214                                    | 2993 $\pm$ 543                          | -1.44 |
| <i>RELN</i>                            | Reelin                                                           | -4.133         | 0.038            | 339 $\pm$ 130                                      | 197 $\pm$ 67                            | -1.72 |
| Upregulated in P4HA1-knockdown cells   |                                                                  |                |                  |                                                    |                                         |       |
| <i>KCNE4</i>                           | Potassium voltage-gated channel subfamily E regulatory subunit 4 | 8.844          | 4.38E-15         | 617 $\pm$ 75                                       | 1145 $\pm$ 240                          | 1.86  |
| <i>DKK1</i>                            | Dickkopf WNT signaling pathway inhibitor 1                       | 5.075          | 0.00074          | 1016 $\pm$ 192                                     | 1358 $\pm$ 277                          | 1.34  |
| <i>HERPUD1</i>                         | Homocysteine inducible ER protein with ubiquitin like domain 1   | 4.594          | 0.0069           | 1084 $\pm$ 72                                      | 1485 $\pm$ 308                          | 1.37  |
| <i>F2RL2</i>                           | Coagulation factor II thrombin receptor like 2                   | 4.059          | 0.047            | 1142 $\pm$ 165                                     | 1515 $\pm$ 175                          | 1.33  |
